# Supplementary material
Source: HighWire-hosted journal article supplement (https://err.ersjournals.com/content/27/149/180045)
Supplement: inline-supplementary-material-1 [file inline-supplementary-material-1.pdf]

## APPENDIX 1: Search strategies

### 1. EMBASE database search strategy performed 18.08.2017

Database: Embase <1974 to 2017 August 17>

Search Strategy:

- 
- 1 exp general practitioner/ (82004)
  - 2 exp general practice/ (76694)
  - 3 general practitioner.mp. (92535)
  - 4 family physician\*.mp. (16431)
  - 5 exp physician/ (578706)
  - 6 physician/ or hospital physician/ or oncologist/ or pulmonologist/ or surgeon/ (349327)
  - 7 ((cardiothoracic or thoracic) adj1 surgeon).mp. [mp=title, abstract, heading word, drug trade name, original title, device manufacturer, drug manufacturer, device trade name, keyword, floating subheading word] (1483)
  - 8 1 or 2 or 3 or 4 or 5 or 6 or 7 (654316)
  - 9 exp primary health care/ (139227)
  - 10 exp general practice/ (76694)
  - 11 general practi\*.mp. (177732)
  - 12 exp secondary health care/ (4521)
  - 13 exp health care delivery/ (2623537)
  - 14 secondary healthcare.mp. (304)
  - 15 exp tertiary care center/ (28587)

16 exp health care availability/ (10866)

17 hospital/ or community hospital/ or field hospital/ or general hospital/ or high volume hospital/ or hospital bed capacity/ or hospital building/ or "hospital subdivisions and components"/ or low volume hospital/ or magnet hospital/ or private hospital/ or public hospital/ or safety net hospital/ or teaching hospital/ (521219)

18 gp\*.mp. (206264)

19 9 or 10 or 11 or 12 or 13 or 14 or 15 or 16 or 17 (3112911)

20 8 or 18 (832934)

21 exp lung cancer/ (238284)

22 exp lung tumor/ (294205)

23 exp non small cell lung cancer/ or exp lung carcinoma/ (90376)

24 lung carcinoma/ or lung adenocarcinoma/ (58973)

25 exp respiratory tract tumor/ (374198)

26 lung cancer.mp. (233992)

27 21 or 22 or 23 or 24 or 25 or 26 (425912)

28 exp time factor/ (13292)

29 exp time to treatment/ (9223)

30 timeliness.mp. (4772)

31 (interval\* adj5 (primary or secondary or diagnostic or treatment)).mp. [mp=title, abstract, heading word, drug trade name, original title, device manufacturer, drug manufacturer, device trade name, keyword, floating subheading word] (20028)

32 diagnosis/ or diagnostic procedure/ or delayed diagnosis/ or diagnostic test/ or early diagnosis/ or tumor diagnosis/ (1460853)

33 exp early cancer diagnosis/ (1989)

34 exp patient referral/ (84518)

35 exp consultation/ (91634)

36 28 or 29 or 30 or 31 or 32 or 33 or 34 or 35 (1659975)

37 19 and 20 and 27 and 36 (1635)

38 limit to EMBASE status (347)

\*\*\*\*\*

## 2. MEDLINE database search strategy performed 18.08.2017

Database: Ovid MEDLINE(R) 1946 to Present with Daily Update

Search Strategy:

- 
- 1 General Practitioners/ (5744)
  - 2 general practitioners/ or physicians, family/ (21713)
  - 3 Physicians, Primary Care/ (2390)
  - 4 Pulmonologists/ (19)
  - 5 exp Oncologists/ (131)
  - 6 exp Thoracic Surgery/ (12219)
  - 7 thoracic physician\*.mp. (24)
  - 8 exp Primary Health Care/ (135392)
  - 9 exp General Practice/ (72298)
  - 10 (family adj5 (physician\* or doctor\*)).mp. [mp=title, abstract, original title, name of substance word, subject heading word, keyword heading word, protocol supplementary concept word, rare disease supplementary concept word, unique identifier, synonyms] (31644)

- 11 Health Services Accessibility/ (64505)
- 12 secondary healthcare.mp. (171)
- 13 exp Secondary Care centers/ or exp tertiary care centers/ (7596)
- 14 hospitals/ or hospitals, community/ or hospitals, general/ or hospitals, group practice/ or hospitals, high-volume/ or hospitals, low-volume/ or hospitals, private/ or hospitals, public/ or hospitals, rural/ or hospitals, satellite/ or hospitals, special/ or hospitals, teaching/ or hospitals, urban/ (151114)
- 15 GP\*.mp. (153136)
- 16 cardiothoracic surgeon.mp. (138)
- 17 thoracic surgeon\*.mp. (2778)
- 18 cardiothoracic surgeon\*.mp. (471)
- 19 oncologist\*.mp. (12981)
- 20 1 or 2 or 3 or 4 or 5 or 6 or 7 or 8 or 9 or 10 or 11 or 12 or 13 or 14 or 15 or 16 or 17 or 18 or 19 (591332)
- 21 "referral and consultation"/ or gatekeeping/ or remote consultation/ or distance counseling/ or Secondary Care/ or tertiary healthcare/ (66926)
- 22 Time Factors/ (1141931)
- 23 Time-to-Treatment/ (3199)
- 24 time factor\*.mp. (1143534)
- 25 referral\*.mp. (123754)
- 26 exp "Early Detection of Cancer"/ (17856)
- 27 timeliness.mp. (3117)
- 28 (interval\* adj5 (primary or secondary or diagnostic or treatment)).mp. [mp=title, abstract, original title, name of substance word, subject heading word, keyword heading word, protocol supplementary concept word, rare disease supplementary concept word, unique identifier, synonyms] (12451)
- 29 "appointments and schedules"/ or waiting lists/ (18109)
- 30 diagnosis/ or clinical decision-making/ or delayed diagnosis/ or "diagnostic techniques and procedures"/ or diagnostic imaging/ or early diagnosis/ or "early detection of cancer"/ or incidental findings/ (112976)
- 31 (diagnosis adj5 (early or delayed or late)).mp. [mp=title, abstract, original title, name of substance word, subject heading word, keyword heading word, protocol supplementary concept word, rare disease supplementary concept word, unique identifier, synonyms] (107865)
- 32 diagnostic imaging/ or diagnostic techniques, respiratory system/ or diagnostic tests, routine/ (49275)
- 33 21 or 22 or 23 or 24 or 25 or 26 or 27 or 28 or 29 or 30 or 31 or 32 (1475517)

- 34 lung cancer\*.mp. (113369)
- 35 lung neoplasm\*.mp. (197003)
- 36 exp Respiratory Tract Neoplasms/ (266452)
- 37 lung carcinoma.mp. (17722)
- 38 bronchial neoplasms/ or carcinoma, bronchogenic/ or carcinoma, non-small-cell lung/ or small cell lung carcinoma/ (66572)
- 39 Carcinoma, Squamous Cell/ or lung adenocarcinoma.mp. (130292)
- 40 lung neoplasms/ or bronchial neoplasms/ or carcinoma, bronchogenic/ (207606)
- 41 34 or 35 or 36 or 37 or 38 or 39 or 40 (384328)
- 42 20 and 33 and 41 (929)

\*\*\*\*\*

### 3. SCOPUS database search strategy performed 18.08.2017

- 1 TITLE-ABS-KEY ("lung cancer\*" OR "lung carcinoma" OR "lung neoplasm\*")
- 2 TITLE-ABS-KEY ( "time factor\*" OR "time delay\*" OR "time interval\*" OR "timeliness" OR "diagnostic delay\*" OR "treatment delay\*" OR "waiting time\*" OR "waiting list\*")
- 3 TITLE-ABS-KEY ("Primary Care" OR "Secondary Care" OR "referral pattern\*" OR "tertiary care" OR "health service\*")
- 4 1 and 2 and 3 (233 results)

## APPENDIX 2: Data extraction chart

| #  | BIBLIOMETRIC<br>S          | STUDY<br>DESIGN<br><br>Region, Year                                                                                                              | DATA<br>SOURCE                                                                                                                                     | AIMS                                                                                                                                                                                     | OUTCOME<br>MEASURES<br>OF INTEREST<br>/ DEFINITIONS                                                                                                             | RESULTS:<br>Patient<br>Demographics                                                                                              | Time Intervals in lung cancer pathway by Olesen's definitions <sup>1</sup> or equivalent |                    |                    |                                             |     |                         |                    |                                                                                                     | SUGGESTED<br>FACTORS<br>RESPONSIBL<br>E FOR DELAY  | Guidelines applied on<br>target times?                                                                                                                                                                                                                             | Involvement of<br>Fast Track<br>System? |                                              |
|----|----------------------------|--------------------------------------------------------------------------------------------------------------------------------------------------|----------------------------------------------------------------------------------------------------------------------------------------------------|------------------------------------------------------------------------------------------------------------------------------------------------------------------------------------------|-----------------------------------------------------------------------------------------------------------------------------------------------------------------|----------------------------------------------------------------------------------------------------------------------------------|------------------------------------------------------------------------------------------|--------------------|--------------------|---------------------------------------------|-----|-------------------------|--------------------|-----------------------------------------------------------------------------------------------------|----------------------------------------------------|--------------------------------------------------------------------------------------------------------------------------------------------------------------------------------------------------------------------------------------------------------------------|-----------------------------------------|----------------------------------------------|
|    |                            |                                                                                                                                                  |                                                                                                                                                    |                                                                                                                                                                                          |                                                                                                                                                                 |                                                                                                                                  | GP-LCS<br>interval                                                                       | Doctor<br>Interval | System<br>Interval | PCI                                         | SCI | Diagnosti<br>c Interval | Treatment Interval | Total<br>interval                                                                                   |                                                    |                                                                                                                                                                                                                                                                    |                                         | Other<br>relevant<br>intervals /<br>findings |
| 1. | Zikovic et al.,<br>2014(1) | Retrospective<br>study<br><br>Montenegro,<br>2009-10                                                                                             | Medical<br>records                                                                                                                                 | Investigate whether<br>delays in<br>diagnosis and<br>treatment of<br>patients with lung<br>cancer impacts<br>prognosis and<br>survival.                                                  | Total interval<br><br>Other:<br><br>GP delay = first<br>consultation to<br>first LCS visit<br><br>Lung Specialist<br>delay = first<br>LCS visit to<br>diagnosis | N=206<br><br>M:F ratio 5:1<br><br>46% NSCLC                                                                                      |                                                                                          |                    |                    | MEAN 2.07<br>weeks<br>(range 1-20<br>weeks) |     |                         |                    | MEAN 4.22<br>weeks<br>(range 1-23<br>weeks)                                                         | LCS to Dx=<br>mean 2.37<br>weeks                   | 5.1<br>1.13                                                                                                                                                                                                                                                        | BTS(2)                                  | No                                           |
| 2. | Prades et al.,<br>2011(3)  | Mixed<br>methods study<br>including<br>prospective<br>quantitative +<br>qualitative<br>data collection<br><br>Catalonia,<br>Spain 2006 -<br>2009 | Hospital data<br>and<br>semistructured<br>interviews with<br>primary and<br>specialised<br>health<br>professionals<br>and health<br>administrators | To analyse the<br>implementation and<br>overall<br>effectiveness of the<br>Cancer Fast-track<br>Programme for<br>breast, colorectal<br>and lung cancer<br>annually over 4<br>year period | Total interval                                                                                                                                                  | N= 3841 for<br>2009<br><br>Qualitative<br>study based on<br>83 semi-<br>structured<br>interviews with<br>health<br>professionals |                                                                                          |                    |                    |                                             |     |                         |                    | Means(in<br>days)(for<br>different<br>years<br><br>2006 = 31<br>2007 = 39<br>2008 = 32<br>2009 = 37 | 2.4<br>3.3 (a)<br>2.3<br>1.15<br>5.6<br>5.5<br>5.3 | CFP 30 day policy<br>target from suspicious<br>presentation to<br>treatment start:<br><br>50% lung cancer<br>cases overall equally<br>divided between two<br>longest wait<br>categories<br><br>% <30 days:<br>2006 = 63%<br>2007 = 48%<br>2008 = 58%<br>2009 = 51% | Yes - Cancer<br>Fast-track<br>Programme |                                              |

| #  | BIBLIOMETRIC<br>S                       | STUDY<br>DESIGN<br><br>Region, Year                                                                                                                                             | DATA<br>SOURCE                                                      | AIMS                                                                                                                                                                                                                        | OUTCOME<br>MEASURES<br>OF INTEREST<br>/ DEFINITIONS                                                                                                | RESULTS:<br>Patient<br>Demographics                                                                                                                  | Time intervals in lung cancer pathway by Olesen's definitions <sup>1</sup> or equivalent |                    |                    |                                  |                                                                         |                            |                    |                                                                                                                                                                  | SUGGESTED<br>FACTORS<br>RESPONSIBL<br>E FOR DELAY                                                                                                                              | Guidelines applied on<br>target times?                                                                                                                                                                                                                                                                                                                                                                     | Involvement of<br>Fast Track<br>System?                    |
|----|-----------------------------------------|---------------------------------------------------------------------------------------------------------------------------------------------------------------------------------|---------------------------------------------------------------------|-----------------------------------------------------------------------------------------------------------------------------------------------------------------------------------------------------------------------------|----------------------------------------------------------------------------------------------------------------------------------------------------|------------------------------------------------------------------------------------------------------------------------------------------------------|------------------------------------------------------------------------------------------|--------------------|--------------------|----------------------------------|-------------------------------------------------------------------------|----------------------------|--------------------|------------------------------------------------------------------------------------------------------------------------------------------------------------------|--------------------------------------------------------------------------------------------------------------------------------------------------------------------------------|------------------------------------------------------------------------------------------------------------------------------------------------------------------------------------------------------------------------------------------------------------------------------------------------------------------------------------------------------------------------------------------------------------|------------------------------------------------------------|
|    |                                         |                                                                                                                                                                                 |                                                                     |                                                                                                                                                                                                                             |                                                                                                                                                    |                                                                                                                                                      | GP-LCS<br>interval                                                                       | Doctor<br>Interval | System<br>Interval | PCI                              | SCI                                                                     | Diagnosti<br>c Interval    | Treatment Interval | Total<br>interval                                                                                                                                                |                                                                                                                                                                                |                                                                                                                                                                                                                                                                                                                                                                                                            |                                                            |
| 3. | Murphy et al.,<br>2015(4)               | Prospective<br>cluster<br>randomised<br>controlled trial<br><br>Texas 2015                                                                                                      | Electronic<br>health records                                        | Evaluate whether<br>electronic health-<br>record based<br>trigger algorithms<br>could prevent<br>delays in diagnostic<br>evaluation for<br>cancer.                                                                          | Other:<br><br>First suspicious<br>investigation to<br>diagnostic<br>evaluation<br>(referral to<br>specialist/repea<br>t scan or lung<br>procedure) | N=19 (lung)<br>but 7 numbers<br>in each group<br><br>M 50% (control)<br><br>M 56% (trigger)<br>for all cancers<br>(lung,<br>colorectal,<br>prostate) |                                                                                          |                    |                    |                                  |                                                                         |                            |                    | First scan to<br>Dx (median<br>n=65<br>(trigger), 93<br>days<br>(control). No<br>sig<br>difference.                                                              | 2.7<br>1.6 (a)<br>1.6 (b)<br>3.8                                                                                                                                               |                                                                                                                                                                                                                                                                                                                                                                                                            | Prospective<br>electronic<br>trigger-based<br>intervention |
| 4. | 3<br>Mitchell et al.,<br>2013(5)        | Qualitative<br>synthesis of<br>significant<br>event audit<br>reports<br><br>North of<br>England<br>Cancer<br>Network 2003<br>- 2009                                             | Significant<br>event audits<br>(SEA) in<br>Primary Care<br>practice | Gain insights into<br>the diagnostic<br>process<br>for lung cancer                                                                                                                                                          | Primary Care<br>Interval                                                                                                                           | N=132<br>M=48.5%<br>mean age 68yrs<br><br>North of<br>England Cancer<br>Network                                                                      |                                                                                          |                    |                    | >31days<br>(n=45)                |                                                                         |                            |                    |                                                                                                                                                                  | 4.2(a)<br>1.9<br>1.11<br>1.6b<br>1.6a<br>1.10<br>1.19a<br>2.3<br>4.4<br>2.1<br>1.10c<br>2.6                                                                                    | 2 week wait rule (6)                                                                                                                                                                                                                                                                                                                                                                                       | TWW                                                        |
| 5. | Mansson et al.,<br>1994(7)              | Retrospective<br>file review<br><br>Sweden<br>(1980-1984)                                                                                                                       | Swedish<br>Cancer<br>Registry                                       | To study role of GP<br>in the<br>diagnostic process<br>for lung cancer.                                                                                                                                                     | Diagnostic<br>interval                                                                                                                             | N=39<br>M=67%<br>Swedish pts                                                                                                                         |                                                                                          |                    |                    |                                  | Mean =<br>12.5<br>weeks<br>(87.5<br>days)<br>(range 0-<br>104<br>weeks) |                            |                    | No significant<br>difference in<br>diagnostic<br>intervals for<br>GPs versus<br>LCS                                                                              | 1.15<br>1.14                                                                                                                                                                   |                                                                                                                                                                                                                                                                                                                                                                                                            |                                                            |
| 6. | 4<br>Leiro Fernandez<br>et al., 2014(8) | Prospective<br>analysis of<br>impact<br>on rapid<br>diagnostic unit<br>on lung cancer<br>diagnostic<br>intervals;<br>Pontevedra,<br>Spain 2008 -<br>2010                        | Electronic<br>medical<br>records                                    | To assess Lung<br>Cancer Rapid<br>Diagnostic Unit<br>(LCRDU) system<br>for alerting<br>pulmonologists by<br>radiologists to a<br>radiological<br>suspicion of lung<br>cancer                                                | Other:<br><br>First alert of<br>suspicious<br>scan to<br>diagnosis                                                                                 | N = 47 (57%)<br>malignant<br>M 67%                                                                                                                   |                                                                                          |                    |                    |                                  |                                                                         |                            |                    | Median 13<br>days for all<br>patients (IQR<br>7.3 – 30)                                                                                                          | 1.13<br>3.1<br>4.5<br>3.7                                                                                                                                                      |                                                                                                                                                                                                                                                                                                                                                                                                            | Lung Cancer<br>Rapid<br>Diagnostic<br>Unit (LCRDU).        |
| 7. | Largey et al.,<br>2016(9)               | Retrospective<br>medical audit<br>in one<br>principal<br>referral<br>hospital in<br>Victoria AUS,<br>2013                                                                       | Medical<br>records                                                  | To compare lung<br>cancer diagnostic<br>and treatment<br>intervals with<br>agreed<br>target measures<br>across three large<br>public health<br>services in Victoria                                                         | Treatment<br>Interval<br><br>Secondary<br>Care interval<br><br>Other:<br><br>GP referral to<br>diagnosis                                           | N=78<br><br>Mean age was<br>68 years<br><br>Non-small cell<br>lung cancer<br>diagnosed in<br>76%                                                     |                                                                                          |                    |                    | Mean =<br>61.5 ±<br>58.2<br>days |                                                                         | Mean = 30.4 ± 45.3<br>days |                    | Mean interval<br>from GP<br>referral to<br>diagnosis<br>28.4 ± 56.5<br>days                                                                                      | 3.3 (a)<br>1.20<br>4.8<br>1.10<br>4.9<br>3.6<br>5.1<br>3.2                                                                                                                     | The Victorian Lung<br>Cancer Registry<br>(10)and Danish Lung<br>Cancer Group and<br>Registry(11): (1)<br>referral to-<br>diagnosis target = 28<br>days; (2) treatment<br>interval target<br>=14 days; and (3)<br>Secondary Care<br>interval target = 42<br>days. Mean SCI (44%<br>within target), mean<br>treatment interval<br>(45% within target),<br>mean GP referral to<br>Dx = (68% within<br>target) | No                                                         |
| 8. | Kaergaard Starr<br>et al., 2013(12)     | Cohort study<br>2001–2008<br><br>Denmark                                                                                                                                        | Danish Lung<br>Cancer<br>Registry                                   | To examine<br>possible<br>associations<br>between<br>socioeconomic<br>position and<br>surgical treatment<br>of patients with<br>early-stage NSCLC                                                                           | Other:<br><br>Time between<br>GP referral and<br>diagnosis                                                                                         | N = 5538<br>Stage I = 58%<br>Median age<br>(men) = 67<br>years, 69 years<br>(women)                                                                  |                                                                                          |                    |                    |                                  |                                                                         |                            |                    | 47%<br>(2585/5538)<br>took ≥ 28<br>days from<br>referral to<br>diagnosis<br>(49% in short<br>education<br>population,<br>45% in high<br>education<br>population) | 3.3 (a)<br>4.7                                                                                                                                                                 | Yes: Time from<br>referral to diagnosis ≤<br>28 days by national<br>guidelines                                                                                                                                                                                                                                                                                                                             |                                                            |
| 9. | Jwa et al.,<br>2004(13)                 | Review of<br>medical<br>records at one<br>urban group<br>practice<br>serving a<br>mixed<br>population of<br>deprived and<br>affluent<br>communities in<br>UK<br><br>1990 - 2003 | Primary Care<br>records                                             | To explore the<br>circumstances in<br>which the diagnosis<br>of cancer is delayed<br>with<br>reference to the<br>Primary Care<br>records and by a<br>structured<br>investigation of<br>clinical records in<br>one practice. | Primary Care<br>Interval<br><br>Diagnostic<br>Interval<br><br>Other:<br><br>GP referral to<br>Diagnosis                                            | N = 6                                                                                                                                                |                                                                                          |                    |                    | Mean = 40<br>days                |                                                                         | Mean =<br>95 days          |                    | Mean time<br>from referral<br>to diagnosis =<br>55 days                                                                                                          | 1.9<br>1.10<br>1.11<br>1.15<br>1.16<br>1.6<br>2.3<br>2.7<br>2.9<br>2.11<br>2.5 (a)<br>3.1<br>3.2 (a)<br>3.4<br>3.7<br>3.8<br>3.10 (b)<br>3.11 (b)<br>3.12<br>4.1<br>4.2<br>5.9 | Yes: NHS guidelines<br>on 2-week wait<br>criteria                                                                                                                                                                                                                                                                                                                                                          |                                                            |

| #   | BIBLIOMETRIC<br>S            | STUDY<br>DESIGN<br><br>Region, Year                                  | DATA<br>SOURCE                                                                                                                                    | AIMS                                                                                                                                                                                                                                                | OUTCOME<br>MEASURES<br>OF INTEREST<br>/ DEFINITIONS                                                                                     | RESULTS:<br>Patient<br>Demographics                                                                          | Time intervals in lung cancer pathway by Olesen's definitions <sup>1</sup> or equivalent |                                        |                                         |                                                                                                 |     |                         |                                        |                                                       | SUGGESTED<br>FACTORS<br>RESPONSIBL<br>E FOR DELAY                                                                                       | Guidelines applied on<br>target times?                     | Involvement of<br>Fast Track<br>System? |                                              |
|-----|------------------------------|----------------------------------------------------------------------|---------------------------------------------------------------------------------------------------------------------------------------------------|-----------------------------------------------------------------------------------------------------------------------------------------------------------------------------------------------------------------------------------------------------|-----------------------------------------------------------------------------------------------------------------------------------------|--------------------------------------------------------------------------------------------------------------|------------------------------------------------------------------------------------------|----------------------------------------|-----------------------------------------|-------------------------------------------------------------------------------------------------|-----|-------------------------|----------------------------------------|-------------------------------------------------------|-----------------------------------------------------------------------------------------------------------------------------------------|------------------------------------------------------------|-----------------------------------------|----------------------------------------------|
|     |                              |                                                                      |                                                                                                                                                   |                                                                                                                                                                                                                                                     |                                                                                                                                         |                                                                                                              | GP-LCS<br>interval                                                                       | Doctor<br>Interval                     | System<br>Interval                      | PCI                                                                                             | SCI | Diagnosti<br>c Interval | Treatment Interval                     | Total<br>interval                                     |                                                                                                                                         |                                                            |                                         | Other<br>relevant<br>intervals /<br>findings |
| 10. | Hsieh et al.,<br>2012(14)    | Retrospective<br>questionnaire                                       | Patient<br>questionnaires<br>and one-on-<br>one interviews<br>from patients<br>with lung<br>cancer in<br>medical centre<br>in Taiwan<br>2007-2011 | Understand delay in<br>the diagnosis of<br>lung cancer under<br>the referral-free<br>healthcare system<br>in Taiwan, and to<br>identify<br>the factors<br>associated with it                                                                        | Diagnostic<br>Interval                                                                                                                  | N=840<br>Mean age 63yrs<br>M 55.9%<br>Stage IV 40%                                                           |                                                                                          |                                        |                                         |                                                                                                 |     | Mean =<br>52.1 days     |                                        |                                                       | 3.7<br>4.5<br>5.3<br>5.7 (b)<br>1.7 (a)<br>1.2 (b)<br>1.1 (a)<br>1.22 (a)<br>1.23 (a)<br>1.24                                           | No                                                         | No                                      |                                              |
| 11. | Hall et al.,<br>2008(15)     | Retrospective<br>file review<br><br>Western<br>Australia<br><br>2005 | WACR<br>(Western<br>Australia<br>Cancer<br>Registry)                                                                                              | To compare<br>patterns of<br>diagnostic testing,<br>stage and specialist<br>referral between<br>rural and<br>metropolitan areas<br>and to exposure<br>barriers to quality<br>care                                                                   | Other:<br>First GP to first<br>LCS                                                                                                      | N Rural = 22<br>64% male<br>63.3 yrs<br>14% St IV<br><br>N metro = 21<br>57% male<br>Age 63.8yrs<br>5% St IV |                                                                                          |                                        |                                         | Rural:<br>Mean 24.7<br>days (SD<br>30.2)<br><br>Metropolita<br>n mean<br>19.1 days<br>(SD 18.4) |     |                         |                                        |                                                       | 1.18 (a)<br>3.2<br>3.10 (a)<br>5.6<br>3.4<br>1.15<br>2.3<br>2.8<br>4.1<br>4.4<br>3.5 (a)<br>4.6                                         |                                                            |                                         |                                              |
| 12. | Billing et al.,<br>1996(16)  | Retrospective<br>study<br><br>1993,<br>Papworth, UK                  | Medical<br>records                                                                                                                                | to assess the length<br>and cause of delay<br>from the first<br>presentation of lung<br>cancer to surgery<br>and to identify the<br>stages at which<br>such delay occurs.                                                                           | Total interval<br><br>PCI<br><br>Doctor interval<br><br>GPLCS interval                                                                  | N 38<br>Mean age 61<br>76% male                                                                              | Mean 15 days<br>(95%CI 11-<br>19)                                                        | Mean<br>26<br>days<br>(95%CI<br>14-38) |                                         | Mean 32<br>days<br>(95%CI 21-<br>42)                                                            |     |                         | Mean 109<br>days<br>(95%CI 92-<br>127) |                                                       | 3.1<br>4.1<br>3.6<br>2.3<br>4.7<br>5.1<br>4.8                                                                                           |                                                            |                                         |                                              |
| 13. | Dalton et al.,<br>2011(17)   | Denmark<br>2001-2008                                                 | Danish Lung<br>Cancer<br>Registry                                                                                                                 |                                                                                                                                                                                                                                                     | GP referral to<br>Dx                                                                                                                    | N 18103<br>54% male                                                                                          |                                                                                          |                                        |                                         |                                                                                                 |     |                         |                                        | Median GP<br>referral to Dx<br>= 20 days              | 1.2 (a)<br>1.7 (b)<br>1.1<br>1.13<br>1.10                                                                                               | Danish National<br>Cancer Plan: GP<br>referral to Dx < 28d |                                         |                                              |
| 14. | Iachina et al.,<br>2017 (18) | Retrospective<br>cohort study<br><br>Denmark 2008<br>- 2012          | Danish Lung<br>Cancer<br>Registry                                                                                                                 | To explore impact<br>of fast track transfer<br>pathways between<br>hospitals on times<br>to diagnosis and<br>treatment of Non-<br>Small Cell Lung<br>Cancer (NSCLC).                                                                                | Treatment<br>interval<br><br>Secondary<br>Care interval<br><br>Other: Referral<br>to Dx                                                 | N 11273 (total)<br>100% NSCLC<br>52% male<br><br>Transfer 4434<br><br>Not transferred<br>6839                |                                                                                          |                                        |                                         | Mean<br>38.38(S<br>D 15.42)                                                                     |     | Mean 16.9 (SD<br>10.64) |                                        | Referral to Dx<br>mean 21.47<br>(SD 12)               | 5.4<br>1.2 (a)<br>1.13<br>1.10 (c)<br>1.8                                                                                               | Danish National<br>Board of Health                         |                                         |                                              |
| 15. | Ringbaek et al.,<br>1999(19) | <br><br>Denmark 1991<br>- 1993                                       |                                                                                                                                                   | To examine the<br>diagnostic process<br>for suspected lung<br>cancer patients at<br>Bispebjerg Hospital                                                                                                                                             | GP LCS<br>interval<br><br>LCS to Dx                                                                                                     | N 467<br>Mean age 78<br>years<br>64% men                                                                     | Mean 7.6<br>days                                                                         |                                        |                                         |                                                                                                 |     |                         | 26 days                                |                                                       | LCS to Dx<br>Mean 43.1<br>days                                                                                                          | 1.2<br>3.8<br>1.19 (b)<br>4.7<br>1.6                       | 98% patients<br>GPLCS<1 month           |                                              |
| 16. | Cattaneo et al.,<br>2014(20) | Report<br><br>Annapolis,<br>Maryland,<br>USA<br><br>2010             | Medical<br>records                                                                                                                                | To assess effect of<br>Rapid Access<br>Chest and Lung<br>Assessment<br>Program (RACLAP)<br>at Anne Arundel<br>Medical Center<br>(AAMC) in<br>Annapolis.                                                                                             | Other:<br>Scan to<br>diagnosis                                                                                                          | N 72 (lung<br>cancer patients)<br>(N processed<br>through<br>RACLAP =121)<br>StIV 31%                        |                                                                                          |                                        |                                         |                                                                                                 |     |                         |                                        | Median time<br>from Scan to<br>diagnosis =<br>16 days | 5.6                                                                                                                                     |                                                            | Yes                                     |                                              |
| 17. | Yoshida et al.,<br>2012(21)  | Retrospective<br>study<br><br>1999 – 2000<br><br>Japan               | Radiology<br>information<br>system                                                                                                                | To identify the CT<br>characteristics of<br>early lung cancer in<br>relation to chronic<br>interstitial<br>pneumonia on<br>serial images<br>obtained from the<br>time of no<br>identifiable tumor to<br>clinical diagnosis of<br>overt lung cancer. | Other:<br>Scan to<br>diagnosis                                                                                                          | N 22<br>82% male<br>Age 70yrs<br>St IV 8.7%                                                                  |                                                                                          |                                        |                                         |                                                                                                 |     |                         |                                        |                                                       | Median time<br>from Other:<br>Scan to<br>diagnosis =<br>409 days<br>(range 0 –<br>1301)                                                 | 4.2                                                        |                                         |                                              |
| 18. | Bowen et al.,<br>2002(22)    | Prospective<br>pilot study<br><br>UK 2002                            | Patient<br>questionnaires                                                                                                                         | To document the<br>time between<br>occurrence of<br>symptoms and<br>presentation to GP<br>for patients<br>presenting with lung<br>cancer to two NHS<br>trusts with 'rapid<br>access clinics'.                                                       | Other:<br>GP visit to LCS<br>visit interval                                                                                             | N 37<br>Mean age 65<br>yrs<br>51% male                                                                       |                                                                                          |                                        |                                         |                                                                                                 |     |                         |                                        |                                                       | Other:<br>First GP visit<br>to LCS visit:<br>Median 8<br>weeks (56<br>days) range 0<br>to >25<br>weeks)                                 | 1.15<br>2.4<br>2.3<br>2.7                                  | NHS / DOH (23)                          | Yes: TWW                                     |
| 19. | Yorio et al.,<br>2009(24)    | Retrospective<br>analysis<br><br>Texas<br><br>2000 to 2005           | Medical<br>records and<br>hospital<br>tumour<br>registries                                                                                        | Examine the<br>predictors and<br>impact of lung<br>cancer diagnostic<br>and treatment<br>intervals in a setting<br>representative of<br>the diversity and<br>complexities of the<br>contemporary<br>American health<br>care system                  | Treatment<br>Interval<br><br>Other:<br>Time from initial<br>suspectious<br>imaging to<br>diagnosis<br>(image-<br>diagnosis<br>interval) | N=482<br><br>Mean age<br>63.6yrs<br>83% NSCLC<br>All Stage I-III                                             |                                                                                          |                                        | Median=5<br>9 days<br>(IQR 34 -<br>93 ) |                                                                                                 |     |                         | Median=33 days<br>(IQR 20 - 53)        |                                                       | Median<br>image-<br>diagnosis =<br>16 days<br>(IQR6 - 43 );<br>significantly<br>associated<br>with hospital<br>and<br>insurance<br>type | 1.2 (a)<br>1.3 (c) & (d)<br>3.5 (a)<br>3.1<br>4.1          |                                         | No                                           |



| #   | BIBLIOMETRIC<br>S                | STUDY<br>DESIGN<br><br>Region, Year                                                                                               | DATA<br>SOURCE                                                                              | AIMS                                                                                                                                                                                                                                              | OUTCOME<br>MEASURES<br>OF INTEREST<br>/ DEFINITIONS                                                                                                                                                                                                                                                                                                             | RESULTS:<br>Patient<br>Demographics                                                                                            | Time intervals in lung cancer pathway by Olesen's definitions <sup>1</sup> or equivalent |                    |                                     |                                       |                                         |                                                               |                                  |                                                                                                                                                                 | SUGGESTED<br>FACTORS<br>RESPONSIBL<br>E FOR DELAY                                                                                                                                                                                                                                                                                                            | Guidelines applied on<br>target times?                                                                                                                  | Involvement of<br>Fast Track<br>System?                                                                                                                                                                                                                                                     |                                              |
|-----|----------------------------------|-----------------------------------------------------------------------------------------------------------------------------------|---------------------------------------------------------------------------------------------|---------------------------------------------------------------------------------------------------------------------------------------------------------------------------------------------------------------------------------------------------|-----------------------------------------------------------------------------------------------------------------------------------------------------------------------------------------------------------------------------------------------------------------------------------------------------------------------------------------------------------------|--------------------------------------------------------------------------------------------------------------------------------|------------------------------------------------------------------------------------------|--------------------|-------------------------------------|---------------------------------------|-----------------------------------------|---------------------------------------------------------------|----------------------------------|-----------------------------------------------------------------------------------------------------------------------------------------------------------------|--------------------------------------------------------------------------------------------------------------------------------------------------------------------------------------------------------------------------------------------------------------------------------------------------------------------------------------------------------------|---------------------------------------------------------------------------------------------------------------------------------------------------------|---------------------------------------------------------------------------------------------------------------------------------------------------------------------------------------------------------------------------------------------------------------------------------------------|----------------------------------------------|
|     |                                  |                                                                                                                                   |                                                                                             |                                                                                                                                                                                                                                                   |                                                                                                                                                                                                                                                                                                                                                                 |                                                                                                                                | GP-LCS<br>interval                                                                       | Doctor<br>Interval | System<br>Interval                  | PCI                                   | SCI                                     | Diagnosti<br>c Interval                                       | Treatment Interval               | Total<br>interval                                                                                                                                               |                                                                                                                                                                                                                                                                                                                                                              |                                                                                                                                                         |                                                                                                                                                                                                                                                                                             | Other<br>relevant<br>intervals /<br>findings |
|     |                                  |                                                                                                                                   |                                                                                             |                                                                                                                                                                                                                                                   | Time from<br>image to<br>treatment<br>initiation<br>(image-<br>treatment<br>interval)                                                                                                                                                                                                                                                                           |                                                                                                                                |                                                                                          |                    |                                     |                                       |                                         |                                                               |                                  |                                                                                                                                                                 |                                                                                                                                                                                                                                                                                                                                                              |                                                                                                                                                         |                                                                                                                                                                                                                                                                                             |                                              |
| 20. | Shershneva M et<br>al., 2013(25) | Mixed-<br>methods study<br><br>Wisconsin,<br>2013                                                                                 | Patient,<br>physician<br>interviews and<br>medical<br>records                               | Measure delays in<br>lung cancer care<br>across multiple<br>health care systems                                                                                                                                                                   | Primary Care<br>interval<br>GP-LCS<br>interval<br><br>Other =<br>First to last<br>diagnostic test<br>delay<br><br>LCS visit to<br>treatment start<br>delay =<br>1. Specialist<br>delay = LCS<br>visit to referral<br>by LCS for<br>treatment<br>2. Specialist<br>treatment delay<br>= Referral by<br>LCS for<br>treatment to<br>treatment start                 | N= 36                                                                                                                          | Median 5<br>days (range 0<br>– 39)                                                       |                    |                                     | Median =14<br>days (range<br>0 – 800) |                                         |                                                               |                                  | Median =<br>50 (Range 5<br>– 2000)                                                                                                                              | Median LCS<br>to treatment<br>start delay =<br>27.5 days (2<br>– 96)<br><br>Median<br>Specialist<br>delay = 14<br>days<br><br>Median<br>Specialist<br>treatment<br>delay =14<br>days<br><br>Median first–<br>last<br>diagnostic<br>test = 15<br>days                                                                                                         | 1.6<br>1.11<br>1.14<br>2.1<br>2.3<br>2.5(a)<br>3.4<br>2.0<br>2.4                                                                                        | BTS(2)<br>RAND (26)                                                                                                                                                                                                                                                                         | No                                           |
| 21. | Winget M et al.,<br>2007(27)     | Stakeholder<br>workshop<br>consensus<br><br>Three<br>Canadian<br>provinces<br>(Alberta,<br>Saskatchewan<br>and Manitoba),<br>2004 | Provincial<br>/territorial<br>Deputy<br>Ministries<br>colorectal and<br>lung cancer<br>data | 1) Identify a set of<br>criteria and<br>variables needed to<br>create comparable<br>measures of<br>important time-to<br>cancer care<br>intervals<br>2) Compare time-<br>to-care across<br>provinces for lung<br>and colorectal<br>cancer patients | Treatment<br>interval<br><br>Other:<br>Diagnosis to<br>first LCS visit<br><br>First LCS visit<br>to treatment<br>start                                                                                                                                                                                                                                          | N = 2936<br><br>Alberta: N 1585,<br>53% male<br><br>Saska N 567,<br>54% male<br><br>Manitoba N<br>784, 52% male                |                                                                                          |                    |                                     |                                       |                                         | Medians = Alberta<br>31<br><br>Saska =41<br><br>Manitoba = 36 |                                  | Diagnosis to<br>first LCS visit:<br>Range of<br>medians =<br>25 – 30 days<br><br>First LCS visit<br>to treatment<br>start: Range of<br>medians =<br>8 – 10 days |                                                                                                                                                                                                                                                                                                                                                              | Health Council of<br>Canada(28)                                                                                                                         | No                                                                                                                                                                                                                                                                                          |                                              |
| 22. | Wang L et al.,<br>2009(29)       | Population<br>based<br>retrospective<br>study<br><br>Michigan<br><br>1992 - 2004                                                  | Medical<br>records                                                                          | To determine effect<br>of time to treatment<br>(TTT) on overall<br>survival (OS) in<br>patients with<br>unresectable Stage<br>III non-small cell<br>lung cancer<br>(NSCLC)                                                                        | Treatment<br>Interval                                                                                                                                                                                                                                                                                                                                           | N=237<br><br>32%<br>adenocarcinom<br>a<br>14% large cell<br>72% Male<br>Median age 65<br>years<br><br>All = Stage III<br>NSCLC |                                                                                          |                    |                                     |                                       |                                         | Median = 57 days<br>(range 0 – 377)                           |                                  |                                                                                                                                                                 | 1.2 (a)<br>1.7 (b)<br>1.8<br>3.5                                                                                                                                                                                                                                                                                                                             |                                                                                                                                                         | No                                                                                                                                                                                                                                                                                          |                                              |
| 23. | Vidaver R et al.,<br>2016(30)    | Mixed-<br>methods study<br><br>Wisconsin and<br>North Carolina<br><br>2012 - 2014                                                 | Patient reports<br>from<br>telephone<br>interviews,<br>questionnaires                       | To explore when<br>and why delays<br>occur and to<br>compare timeliness<br>between two states                                                                                                                                                     | Total interval<br><br>System interval<br><br>Primary Care<br>interval<br><br>GP-LCS<br>interval<br><br>Diagnostic<br>interval<br><br>Treatment<br>interval<br><br>Other:<br>LCS visit to<br>treatment<br><br>First to last<br>diagnostic test<br><br>Treatment<br>consultation to<br>treatment start<br><br>Patient<br>informed of<br>Diagnosis to<br>treatment | N=347<br><br>Age 30-92yrs<br>69% NSCLC                                                                                         | Median 4.5<br>days (0 – 119)                                                             |                    | Median<br>n=36.5<br>days (1-<br>69) | Median<br>n=9.5 days<br>(0 – 1183)    |                                         | Median<br>34 days<br>(0 – 1656)                               | Median 15 days (0<br>-180)       | Median 52<br>days (1 –<br>1687 )                                                                                                                                | Median LCS<br>visit to<br>treatment<br>= 27 days (0<br>– 47)<br><br>Median First<br>to last<br>diagnostic<br>test<br>= 13 days (0<br>– 1680)<br><br>Median time<br>from<br>treatment<br>consultation<br>to treatment<br>start = 16<br>days (0 –<br>1430)<br><br>Median time<br>from patient<br>being<br>informed of<br>Diagnosis to<br>treatment =15<br>days | 1.3<br>1.9<br>1.10<br>2.1<br>2.3<br>1.15<br>2.0<br>3.1<br>2.7<br>3.3<br>1.3<br>1.9<br>1.10<br>3.7<br>2.5<br>3.4<br>3.8<br>4.1<br>5.2<br>3.11 (a)<br>4.7 | -BTS(2)<br>-RAND Cooperation<br>(26): optimum<br>initiation of treatment<br>within 42 days of<br>NSCLC diagnosis<br>and within 14 days of<br>SCLC diagnosis =<br>21% of NSCLC and<br>5% of SCLC patients<br>in this study would be<br>defined as having<br>experienced<br>treatment delays. | No                                           |
| 24. | Evans S et al.,<br>2016(31)      | Retrospective<br>cohort study<br><br>Victoria, 2011-<br>2014                                                                      | Victorian Lung<br>Cancer Care<br>Registry<br>(VLCCR) with<br>data from 8                    | To assess factors<br>associated with<br>second-line delays<br>in the management<br>of patients                                                                                                                                                    | Treatment<br>interval<br><br>Secondary<br>Care interval                                                                                                                                                                                                                                                                                                         | N=1417<br>59% Male<br>18% Stage IV<br>Mean age 71<br>yrs.                                                                      |                                                                                          |                    |                                     |                                       | Median<br>=53 days<br>(IQR 25<br>– 106) |                                                               | Median n=30 days<br>(IQR 6 – 84) |                                                                                                                                                                 | Median time<br>from referral<br>to LCS to<br>diagnosis<br>= 15 days<br>3.5 (a)                                                                                                                                                                                                                                                                               | 1.11 (a)<br>1.12<br>1.13<br>1.20<br>3.5 (a)                                                                                                             | NHS(32): Secondary<br>interval target 62<br>days. This study =<br>median for public<br>patients was 61                                                                                                                                                                                      | No                                           |

| #   | BIBLIOMETRIC<br>S             | STUDY<br>DESIGN<br><br>Region, Year                                                          | DATA<br>SOURCE                                                             | AIMS                                                                                                                                                                    | OUTCOME<br>MEASURES<br>OF INTEREST<br>/ DEFINITIONS                                                                                                                                                                                         | RESULTS:<br>Patient<br>Demographics                                           | Time intervals in lung cancer pathway by Olesen's definitions <sup>1</sup> or equivalent |                    |                    |                                      |                                                                  |                                                        |                                                                                                   | SUGGESTED<br>FACTORS<br>RESPONSIBL<br>E FOR DELAY                                                   | Guidelines applied on<br>target times?                                                                   | Involvement of<br>Fast Track<br>System?                                                                                                                                                                                                                          |                                                                                                                                                                                                                                                                                                                                                                                                                                              |                                              |
|-----|-------------------------------|----------------------------------------------------------------------------------------------|----------------------------------------------------------------------------|-------------------------------------------------------------------------------------------------------------------------------------------------------------------------|---------------------------------------------------------------------------------------------------------------------------------------------------------------------------------------------------------------------------------------------|-------------------------------------------------------------------------------|------------------------------------------------------------------------------------------|--------------------|--------------------|--------------------------------------|------------------------------------------------------------------|--------------------------------------------------------|---------------------------------------------------------------------------------------------------|-----------------------------------------------------------------------------------------------------|----------------------------------------------------------------------------------------------------------|------------------------------------------------------------------------------------------------------------------------------------------------------------------------------------------------------------------------------------------------------------------|----------------------------------------------------------------------------------------------------------------------------------------------------------------------------------------------------------------------------------------------------------------------------------------------------------------------------------------------------------------------------------------------------------------------------------------------|----------------------------------------------|
|     |                               |                                                                                              |                                                                            |                                                                                                                                                                         |                                                                                                                                                                                                                                             |                                                                               | GP-LCS<br>interval                                                                       | Doctor<br>Interval | System<br>Interval | PCI                                  | SCI                                                              | Diagnosti<br>c Interval                                | Treatment Interval                                                                                |                                                                                                     |                                                                                                          |                                                                                                                                                                                                                                                                  | Total<br>interval                                                                                                                                                                                                                                                                                                                                                                                                                            | Other<br>relevant<br>intervals /<br>findings |
|     |                               |                                                                                              | Victorian<br>hospitals (6<br>public, 2<br>private)                         | diagnosed with<br>NSCLC                                                                                                                                                 | Other: Referral<br>to LCS to<br>diagnosis                                                                                                                                                                                                   |                                                                               |                                                                                          |                    |                    |                                      |                                                                  |                                                        |                                                                                                   | (IQR 5 – 36)                                                                                        | 1.18 (a)                                                                                                 | days , with 48%<br>waiting more than 62<br>days.                                                                                                                                                                                                                 |                                                                                                                                                                                                                                                                                                                                                                                                                                              |                                              |
| 25. | Torring M. et al,<br>2013(33) | Prospective<br>population<br>based study<br><br>Aarhus<br>County,<br>Denmark,<br>2004 - 2005 | County<br>Hospital<br>medical<br>database<br><br>Danish Cancer<br>Registry | To assess the<br>association<br>between the length<br>of the diagnostic<br>interval and five-<br>year mortality for<br>five common<br>cancers, including<br>lung cancer | Diagnostic<br>interval                                                                                                                                                                                                                      | N=262<br><br>90% Males<br>Mean 60yrs                                          |                                                                                          |                    |                    |                                      | Median<br>n=52<br>days (IQI<br>30 – 86)                          |                                                        |                                                                                                   |                                                                                                     | 2.3<br>1.15                                                                                              | None                                                                                                                                                                                                                                                             | No                                                                                                                                                                                                                                                                                                                                                                                                                                           |                                              |
| 26. | Sulu E et al.,<br>2011(34)    | Prospective<br>study<br><br>Istanbul,<br>Turkey 2009                                         | Patient clinical<br>files                                                  | To investigate<br>patterns of delays<br>among patients with<br>NSCLC and to<br>identify reasons for<br>the delays                                                       | Treatment<br>interval<br><br>Total Interval<br><br>Other:<br>"Diagnosis<br>delay" =<br>hospital<br>admission to<br>diagnosis<br><br>Referral delay<br>interval (First<br>GP visit to<br>hospital<br>admission for<br>further<br>assessment) | N= 101<br><br>90% Males<br>Mean 60yrs                                         |                                                                                          |                    |                    |                                      |                                                                  | Median = 21 days<br>(95% C.I. 20.8 –<br>28.6, SD 18.3) | Median =<br>98 days<br>(95% C.I.<br>103.7 –<br>135.5, SD<br>74.6)                                 | Median<br>referral delay<br>= 13 days<br><br>Median<br>Diagnosis<br>delays= 13<br>days              | 1.14<br>2.3<br>3.1<br>1.0<br>3.2<br>4.1<br>4.5<br>4.8<br>3.3 (c)<br>1.18 (a)<br>3.7                      | BTS, Swedish Lung<br>Cancer Study Group<br>(35) and Canadian<br>Study Group<br>(36) recommendations<br>: 46.5% met<br>recommended times<br>for total interval,<br>53.6% for GP-LCS,<br>63.4% for "diagnosis<br>delay", 43.6% for<br>Treatment interval<br>delay. | No                                                                                                                                                                                                                                                                                                                                                                                                                                           |                                              |
| 27. | Smith M et al.,<br>2013(37)   | Secondary<br>data analysis<br><br>Houston 2013                                               | Tumour<br>registry data-2<br>large public<br>healthcare<br>systems         | To explore system<br>barriers and<br>resilient actions of<br>Primary Care<br>providers in the<br>diagnostic<br>evaluation of<br>cancer                                  | Diagnostic<br>interval                                                                                                                                                                                                                      | N=12                                                                          |                                                                                          |                    |                    |                                      | Median<br>n= 7<br>weeks<br>(range 15<br>days to<br>>4<br>months) |                                                        |                                                                                                   |                                                                                                     | 1.6 (a)<br>2.5 (b)<br>3.1<br>3.2<br>4.1<br>4.5                                                           | No                                                                                                                                                                                                                                                               | No                                                                                                                                                                                                                                                                                                                                                                                                                                           |                                              |
| 28. | Sawicki M et al.,<br>2013(38) | Population<br>based cohort<br>study<br><br>Lublin, Poland,<br>2010 - 2011                    | Medical<br>records                                                         | Analyse differences<br>in periods of time<br>and reasons for<br>delays in diagnosis<br>and initiation of<br>treatment of lung<br>cancer                                 | Total interval                                                                                                                                                                                                                              | N= 150<br>Mean age 57<br>yrs<br><br>1:1 urban/rural<br>residents of<br>Lublin |                                                                                          |                    |                    |                                      |                                                                  |                                                        | Median<br>n=12 weeks<br>(range 6 –<br>17 weeks),<br>similar for<br>rural and<br>urban<br>patients |                                                                                                     | 2.3<br>3.1<br>4.1<br>4.7<br>2.7<br>3.1<br>4.1<br>4.6<br>1.15<br>2.11<br>2.0<br>2.4<br>5.6<br>3.7<br>3.12 | No                                                                                                                                                                                                                                                               | No                                                                                                                                                                                                                                                                                                                                                                                                                                           |                                              |
| 29. | Salomaa E et<br>al., 2005(39) | Retrospective<br>study of<br>patient records<br><br>Turku, Finland<br>2005                   | Medical<br>records-Turku<br>University<br>Hospital                         | To measure delays<br>of diagnosis and to<br>assess the causes<br>for those delays                                                                                       | Primary Care<br>Interval<br><br>GP-LCS<br>interval<br><br>Treatment<br>interval<br><br>Other:<br>"Specialist's<br>delay" =<br>First LCS visit<br>to diagnosis                                                                               | N=132<br><br>72% M<br>81% NSCLC<br>67% stage IIIB-<br>IV                      | Median 8<br>days                                                                         |                    |                    | Median 16<br>days                    |                                                                  |                                                        | Median 15 days                                                                                    |                                                                                                     | Median<br>Specialist's<br>Delay = 15<br>days                                                             | 1.11<br>2.3<br>3.1<br>4.1<br>3.3 (a)<br>1.2 (a)<br>1.19 (b)<br>4.7<br>1.13<br>5.3<br>5.6                                                                                                                                                                         | -BTS(2): About 50%<br>fulfilled BTS<br>guidelines. PCI target<br>is 7 days (Median PCI<br>in this study did not<br>meet target; a third<br>waited >30 days.)<br><br>-Swedish Lung<br>Cancer Study<br>Group(35): 66%<br>fulfilled Specialist's<br>Delay criteria of 4<br>weeks; 49% fulfilled<br>Treatment Interval<br>criteria<br><br>-Canadian<br>recommendations(36)<br>: Only 26% fulfilled<br>the 4-week<br>Diagnostic interval<br>limit | No                                           |
| 30. | Rolke H.B. et al,<br>2007(40) | Questionnaire-<br>based<br>prospective<br>study<br><br>Southern<br>Norway, 2002-<br>2005     | Medical<br>records,<br>Norwegian<br>Cancer<br>Registry                     | To evaluate the<br>delays in the<br>diagnostic<br>pathways for<br>primary lung cancer<br>in Southern<br>Norway, and to<br>compare results<br>with                       | Primary Care<br>Interval<br><br>GP-LCS<br>interval<br><br>Other:<br>"Specialist's<br>delay" =                                                                                                                                               | N= 479<br><br>72% Stage IIIB<br>or IV<br><br>79% NSCLC                        | Median 1 day<br>(IQR 0 – 7)                                                              |                    |                    | Median 22<br>days<br>(IQR 4 –<br>61) |                                                                  |                                                        |                                                                                                   | Median<br>Specialist's<br>delay = 8<br>days (IQR 3 –<br>19)<br><br>Median<br>Informed<br>diagnostic | 1.13<br>1.15<br>2.5(a)<br>2.7<br>5.3<br>4.5<br>1.10 (c)<br>1.17 (a)                                      | BTS(2)<br>Swedish Lung Cancer<br>Group (SLCG)(35)<br>Patients met BTS and<br>SLCG<br>recommendation:<br>– 71% cases met<br>GPLCSS2% met Dx<br>delay                                                                                                              | No                                                                                                                                                                                                                                                                                                                                                                                                                                           |                                              |

| #   | BIBLIOMETRIC<br>S              | STUDY<br>DESIGN<br><br>Region, Year                                         | DATA<br>SOURCE                                                                | AIMS                                                                                                                                                         | OUTCOME<br>MEASURES<br>OF INTEREST<br>/ DEFINITIONS                                                                                                                                                            | RESULTS:<br>Patient<br>Demographics                                                                                               | Time intervals in lung cancer pathway by Olesen's definitions <sup>1</sup> or equivalent |                    |                               |     |     |                                |                                                                             |                                                                                  | SUGGESTED<br>FACTORS<br>RESPONSIBL<br>E FOR DELAY                                                                                                                                                                                        | Guidelines applied on<br>target times?                                                       | Involvement of<br>Fast Track<br>System?                                                                                                                                                                                                                                                                                                                                                                                     |                                              |
|-----|--------------------------------|-----------------------------------------------------------------------------|-------------------------------------------------------------------------------|--------------------------------------------------------------------------------------------------------------------------------------------------------------|----------------------------------------------------------------------------------------------------------------------------------------------------------------------------------------------------------------|-----------------------------------------------------------------------------------------------------------------------------------|------------------------------------------------------------------------------------------|--------------------|-------------------------------|-----|-----|--------------------------------|-----------------------------------------------------------------------------|----------------------------------------------------------------------------------|------------------------------------------------------------------------------------------------------------------------------------------------------------------------------------------------------------------------------------------|----------------------------------------------------------------------------------------------|-----------------------------------------------------------------------------------------------------------------------------------------------------------------------------------------------------------------------------------------------------------------------------------------------------------------------------------------------------------------------------------------------------------------------------|----------------------------------------------|
|     |                                |                                                                             |                                                                               |                                                                                                                                                              |                                                                                                                                                                                                                |                                                                                                                                   | GP-LCS<br>interval                                                                       | Doctor<br>Interval | System<br>Interval            | PCI | SCI | Diagnosti<br>c Interval        | Treatment Interval                                                          | Total<br>interval                                                                |                                                                                                                                                                                                                                          |                                                                                              |                                                                                                                                                                                                                                                                                                                                                                                                                             | Other<br>relevant<br>intervals /<br>findings |
|     |                                |                                                                             |                                                                               | recommendations from the BTS and Swedish Lung Cancer Group (SLCG)                                                                                            | First LCS visit to diagnosis<br><br>"Informed diagnostic delay" – Decision to do diagnostic test to informing patient of diagnostic result<br><br>"Hospital delay" –first LCS visit to treatment start         |                                                                                                                                   |                                                                                          |                    |                               |     |     |                                |                                                                             | delay = 14 days (IQR 6 – 25)<br><br>Median Hospital delay = 25 days (IQR 13– 42) |                                                                                                                                                                                                                                          | 62% fell within LCs to Rx Target of 31d                                                      |                                                                                                                                                                                                                                                                                                                                                                                                                             |                                              |
| 31. | Redaniel et al., 2015(41)      | Review of medical records<br><br>UK, 1998 - 2009                            | UK Clinical Practice Research Datalink, cancer registries, HES and ONS        | To determine associations between diagnostic intervals for common cancers and five-year survival, stratified by NICE-qualifying alert and non-alert symptoms | Diagnostic interval                                                                                                                                                                                            | N=5737<br><br>M 59%                                                                                                               |                                                                                          |                    |                               |     |     | Median n=88 days(IQR 34 – 210) |                                                                             |                                                                                  | 1.16<br>1.0<br>3.1<br>4.1                                                                                                                                                                                                                | BTS(2)                                                                                       | No                                                                                                                                                                                                                                                                                                                                                                                                                          |                                              |
| 32. | Radzikowska E. et al, 2013(42) | Review of medical records<br><br>Warsaw, Poland, 1995 - 1998                | National Tuberculosis and Lung Diseases Research Institute, Warsaw, Poland    | To evaluate the influence on survival of delays in the diagnosis and treatment in an unselected population of SCLC                                           | Diagnostic interval<br><br>Treatment interval<br><br>Total interval<br><br>Other:<br>First clinical presentation to first LCS visit<br><br>First LCS visit to diagnosis<br><br>First LCS visit to bronchoscopy | N= 3,479<br>Mean age 60 yrs<br>68% extensive stage                                                                                |                                                                                          |                    |                               |     |     | Median 34 days (IQR 19 – 61)   | Median 6 days (IQR 6 – 21)                                                  | Median 42 days (IQR 15 – 84)                                                     | First clinical presentation to first LCS visit = median 19.5 days<br><br>First LCS visit to diagnosis = median 21 days (IQR 14 – 37)<br><br>First LCS visit to bronchoscopy = median 10 days                                             | 5.6<br>3.2<br>1.6<br>4.7<br>1.10<br>4.2 (a)<br>1.15                                          | BTS (2) with Joint Council for Oncology and ACCP (43, 44) – median diagnostic and treatment intervals meet targets                                                                                                                                                                                                                                                                                                          | No                                           |
| 33. | Powell A., et al., 2008(45)    | Retrospective chart review survey<br><br>USA, 2006                          | Medical records in 133 of Department of Veterans Affairs (DVA) cancer centres | Examine the timeliness of key events between initial radiograph and first treatment                                                                          | System interval<br><br>Secondary Care interval<br><br>Treatment interval                                                                                                                                       | N= 2463 (total)<br><br>Stage IV = 34%                                                                                             |                                                                                          |                    | Median=71 days (IQI 39 - 121) |     |     | Median = 12 days (IQR 5 – 29)  | Component median s = 2+7+12<br><br>Addition of means = 4.5+17.5+19.7 = 41.7 |                                                                                  |                                                                                                                                                                                                                                          | 1.6a<br>1.13<br>3.1<br>5.1<br>1.14<br>1.18 (a)<br>4.1<br>2.7<br>2.5<br>3.3 (a)<br>4.5<br>1.9 | No                                                                                                                                                                                                                                                                                                                                                                                                                          | No                                           |
| 34. | Ozlu T. et al, 2004(46)        | Retrospective analysys<br><br>Eastern Black Sea Region, Turkey, 1992 - 1999 | Medical Records                                                               | To determine time interval of symptom onset to diagnosis and treatment                                                                                       | Diagnostic interval<br><br>Treatment interval<br><br>Total interval                                                                                                                                            | 226 patients<br>96% male<br>NSCLC:<br>Stage I/II 11.9%<br>Stage IIIa 19%<br>Stage IIIb 34.5%<br>Stage IV 19.5%<br><br>SCLC: 15.6% |                                                                                          |                    |                               |     |     | Median 8 days (range 1- 210)   | Median 17.5 days (0-206).                                                   | Median 30 days (1 – 253)                                                         |                                                                                                                                                                                                                                          | 2.8<br>5.3<br>3.3 (b) & (c)<br>4.1<br>3.7                                                    | BTS(2) : Median diagnostic interval: 70% cases within target of 14 days                                                                                                                                                                                                                                                                                                                                                     | No                                           |
| 35. | O'Rourke et al, 2000(47)       | Single centre prospective audit<br><br>Glasgow, UK , 1999                   | Medical records                                                               | To investigate natural history of untreated (potentially curable) NSCLC while awaiting radical radiotherapy, as assessed by one consultant                   | Other:<br>First LCS visit to treatment<br><br>First LCS to diagnosis<br><br>First LCS request and treatment<br><br>Delay between diagnostic and planning CT                                                    | N = 29                                                                                                                            |                                                                                          |                    |                               |     |     |                                |                                                                             |                                                                                  | Median interval from first LCS visit to treatment 94 days (35 – 187).<br><br>Median time from first LCS to diagnosis = 20 days (1 – 104).<br><br>Median interval from request to treatment 44 days (23 – 61).<br><br>Median time between | 3.3 (a) & (c)<br>5.1<br>1.6<br>3.6                                                           | Joint Council for Clinical Oncology(48): Radical radiotherapy to commenced 14 – 28 days of LCS request; median interval in this study exceeded target.<br><br>Scottish Intercollegiate Guidelines Network (SIGN) (49): LCS to diagnosis target 14 days and LCS to treatment target = 42 days. Median time from first LCS to diagnosis of 20 days almost met this target. Only 7% of patients met SIGN treatment guidelines. |                                              |

| # | BIBLIOMETRICS | STUDY DESIGN<br>Region, Year | DATA SOURCE | AIMS | OUTCOME MEASURES OF INTEREST / DEFINITIONS | RESULTS: Patient Demographics | Time intervals in lung cancer pathway by Olesen's definitions <sup>1</sup> or equivalent |                 |                 |     |     |                     |                    |                | SUGGESTED FACTORS RESPONSIBLE FOR DELAY.                                                                                                    | Guidelines applied on target times? | Involvement of Fast Track System? |
|---|---------------|------------------------------|-------------|------|--------------------------------------------|-------------------------------|------------------------------------------------------------------------------------------|-----------------|-----------------|-----|-----|---------------------|--------------------|----------------|---------------------------------------------------------------------------------------------------------------------------------------------|-------------------------------------|-----------------------------------|
|   |               |                              |             |      |                                            |                               | GP-LCS interval                                                                          | Doctor Interval | System Interval | PCI | SCI | Diagnostic Interval | Treatment Interval | Total interval | Other relevant intervals / findings                                                                                                         |                                     |                                   |
|   |               |                              |             |      |                                            |                               |                                                                                          |                 |                 |     |     |                     |                    |                | diagnostic CT chest and planning scan = 54 days (18 – 131)<br><br>21% of potentially curable patients became incurable on the waiting list. |                                     |                                   |

| #   | BIBLIOMETRIC<br>S           | STUDY<br>DESIGN<br><br>Region, Year                                                                                                                                           | DATA<br>SOURCE                                                                         | AIMS                                                                                                                                                                                                                    | OUTCOME<br>MEASURES<br>OF INTEREST<br>/ DEFINITIONS                                                                                                                     | RESULTS:<br>Patient<br>Demographics                                                                                                                                                                           | Time intervals in lung cancer pathway by Olesen's definitions <sup>1</sup> or equivalent |                                                         |                    |     |     |                                                                                                                                   |                                                   |                                                                                                      | SUGGESTED<br>FACTORS<br>RESPONSIBL<br>E FOR DELAY                                                                              | Guidelines applied on<br>target times?                                                                                     | Involvement of<br>Fast Track<br>System?                                                                                                                                                                                                                                                                                        |                                                                              |
|-----|-----------------------------|-------------------------------------------------------------------------------------------------------------------------------------------------------------------------------|----------------------------------------------------------------------------------------|-------------------------------------------------------------------------------------------------------------------------------------------------------------------------------------------------------------------------|-------------------------------------------------------------------------------------------------------------------------------------------------------------------------|---------------------------------------------------------------------------------------------------------------------------------------------------------------------------------------------------------------|------------------------------------------------------------------------------------------|---------------------------------------------------------|--------------------|-----|-----|-----------------------------------------------------------------------------------------------------------------------------------|---------------------------------------------------|------------------------------------------------------------------------------------------------------|--------------------------------------------------------------------------------------------------------------------------------|----------------------------------------------------------------------------------------------------------------------------|--------------------------------------------------------------------------------------------------------------------------------------------------------------------------------------------------------------------------------------------------------------------------------------------------------------------------------|------------------------------------------------------------------------------|
|     |                             |                                                                                                                                                                               |                                                                                        |                                                                                                                                                                                                                         |                                                                                                                                                                         |                                                                                                                                                                                                               | GP-LCS<br>interval                                                                       | Doctor<br>Interval                                      | System<br>Interval | PCI | SCI | Diagnosti<br>c Interval                                                                                                           | Treatment Interval                                | Total<br>interval                                                                                    |                                                                                                                                |                                                                                                                            |                                                                                                                                                                                                                                                                                                                                | Other<br>relevant<br>intervals /<br>findings                                 |
| 36. | Neal et al.,<br>2014(50)    | Retrospective<br>review<br><br>UK<br><br>Cohort 1 =<br>patients<br>presenting<br>between 2001<br>– 2002<br><br>Cohort 1 =<br>patients<br>presenting<br>between 2007<br>- 2008 | UK Clinical<br>Practice<br>Research<br>datalink                                        | Compare diagnostic<br>intervals for 15<br>cancer streams in<br>separate cohorts<br>before and after<br>2005 NICE referral<br>guidelines for<br>suspected cancer<br>and by NICE-<br>qualifying<br>presenting<br>symptoms | Diagnostic<br>Interval                                                                                                                                                  | Cohort 1 (pre-<br>NICE): 1816<br>patients<br><br>Cohort 2 (post-<br>NICE): 2851<br>patients                                                                                                                   |                                                                                          |                                                         |                    |     |     | Cohort 1<br>(pre-<br>NICE):11<br>4 days<br>(IQR 48 –<br>238)<br><br>Cohort 2<br>(post-<br>NICE):11<br>2 days<br>(IQR 45 –<br>251) |                                                   | Difference<br>between two<br>years's<br>findings: $P =$<br>$0.47$ (95%CI:<br>$-4.1$ to $8.8$ )       | 1.15<br>1.13<br>5.9<br>5.3<br>2.4<br>2.3<br>2.7                                                                                | NHS (23) and NICE<br>2005 guideline for<br>urgent referral of<br>suspected cancer<br>based on qualifying<br>symptoms(51) . | Yes: NHS<br>urgent referral<br>pathway                                                                                                                                                                                                                                                                                         |                                                                              |
| 37. | Neal et al.,<br>2007(52)    | Retrospective<br>review<br><br>England<br><br>2000–2001                                                                                                                       | Hospital<br>records in one<br>hospital trust                                           | Compare outcomes<br>of cancer<br>patients referred<br>through the urgent<br>referral guidance<br>with those who<br>were not,                                                                                            | GP-LCS<br>interval<br><br>Other: First<br>LCS to Dx                                                                                                                     | N (urgent) = 96<br>St IV 28%<br><br>N (Other) = 313<br>St IV 18%                                                                                                                                              | Urgent:<br>Median 10<br>days (IQR 6 –<br>13)<br><br>Other: 10 (4 –<br>17)                |                                                         |                    |     |     |                                                                                                                                   |                                                   | Urgent:<br>Median : First<br>LCS to Dx =<br>18 days (IQR<br>8 – 36)<br><br>Other: 15 (4 –<br>28)     | 1.13<br>2.7                                                                                                                    | NHS(6): 89% urgent<br>referrals seen within 2<br>weeks vs 57% non-<br>urgent                                               | Yes: NHS<br>urgent referral<br>pathway                                                                                                                                                                                                                                                                                         |                                                                              |
| 38. | Din, N. et al.,<br>2015(53) | Retrospective<br>review<br><br>United<br>Kingdom<br><br>2007 - 2010                                                                                                           | UK Clinical<br>Practice<br>Research<br>datalink                                        | To quantify<br>differences in<br>cancer diagnostic<br>intervals in 15<br>cancers across<br>different patient<br>subgroups by<br>NICE-qualifying<br>alarm presenting<br>symptoms                                         | Diagnostic<br>Interval                                                                                                                                                  | N = 6552<br>57% M<br>Mean age 72yrs                                                                                                                                                                           |                                                                                          |                                                         |                    |     |     | Median<br>113 days<br>(IQR 45 –<br>249)                                                                                           |                                                   |                                                                                                      |                                                                                                                                | 1.2 (a)<br>1.7 (a)<br>1.15                                                                                                 | NICE 2005 guideline<br>(51)                                                                                                                                                                                                                                                                                                    |                                                                              |
| 39. | Nadpara et al.,<br>2015(54) | Retrospective<br>review<br><br>USA<br><br>2002 - 2007                                                                                                                         | SEER<br>Medicare –<br>linked<br>database                                               | Evaluate variations<br>in care and<br>prognosis amongst<br>elderly US patients                                                                                                                                          | GP-LCS<br>interval<br><br>Doctor Interval<br><br>Diagnostic<br>Interval<br><br>Treatment<br>Interval<br><br>Other:<br>LCS to<br>Diagnosis<br><br>CXR to LCS<br>interval | N =48,850<br>86% NSCLC<br><br>52% M<br>87% white<br>83%<br>metropolitan<br>19% aged 66 –<br>69<br>29% aged 80 or<br>more                                                                                      | Median 1 day<br>(0 – 7)<br>N = 14349                                                     | Median<br>15 d<br>(IQR 0 –<br>154)<br><br>N =<br>37,302 |                    |     |     | Median<br>187 days<br>(IQR 36 –<br>308)<br>N=43833                                                                                | Median 25 days<br>(IQR 12 – 45)<br>N = 32441      |                                                                                                      | LCS to<br>Diagnosis :<br>Median 14<br>days (5 – 63)<br>N = 19066<br><br>CXR to LCS:<br>Median 14<br>days (2 – 69)<br>N = 19066 | 3.3 (a)<br>1.17 (a)<br>1.13<br>1.2 (a)<br>1.7 (a)<br>1.4 (a)<br>1.18 (b)<br>1.10<br>1.5 (a)<br>4.1                         | BTS (2)<br>RAND (26)<br>77.5% patients<br>received timely care                                                                                                                                                                                                                                                                 |                                                                              |
| 40. | Myrdal et al.,<br>2004(35)  | Retrospective<br>review from 2<br>centres<br>Central<br>Sweden<br>between 1995<br>-1999                                                                                       | Medical<br>records of<br>patients<br>registered with<br>Regional<br>Cancer<br>Registry | To describe delays<br>and investigate<br>relationship<br>between delays and<br>survival for NSCLC<br>patients                                                                                                           | First LCS visit<br>to treatment<br>start                                                                                                                                | N = 466<br>M = 58%                                                                                                                                                                                            |                                                                                          |                                                         |                    |     |     |                                                                                                                                   |                                                   |                                                                                                      | First LCS visit<br>to treatment<br>start = 1.6<br>months (i.e.,<br>49.6 days)<br>(IQR 0.9 to<br>2.4 months)                    | 3.3 (a)<br>1.13<br>3.6<br>3.7<br>1.15                                                                                      | Swedish Lung Cancer<br>Study group: all<br>diagnostic tests<br>should be completed<br>within 4 weeks of<br>seeing LCS and<br>treatment should be<br>started within 2<br>weeks. Only 51% met<br>criteria. (Only 31% all<br>surgical pts)                                                                                        |                                                                              |
| 41. | Murray et al.,<br>2003(55)  | Multi-site<br>Prospective<br>Pilot<br>Randomised<br>Trial to test<br>feasibility 3<br>District<br>General<br>hospitals and<br>Royal<br>Marsden<br>(Surrey), UK<br>1998 - 2001 | Patient<br>records and<br>EORTC QLQ<br>questionnaires                                  | Randomised pilot<br>study to test<br>feasibility of<br>investigating Rapid<br>Diagnostic System<br>(RDS) compared to<br>conventional<br>diagnostic workup<br>in local chest clinics                                     | Total Interval =<br>Combined<br>Diagnostic +<br>Treatment<br>Interval                                                                                                   | N = 88<br>N for RDS<br>intervention =<br>45<br>60% male<br>Median age 70<br>yrs<br>80% NSCLC;<br>25% Stage IV<br>20% SCLC<br><br>Control = 43<br>M 70%<br>Med age 68<br>NSCLC 78%<br>Stage IV 24%<br>22% SCLC |                                                                                          |                                                         |                    |     |     |                                                                                                                                   |                                                   | RDS = 3<br>weeks<br>For<br>conventiona<br>l system = 7<br>weeks<br>(log rank p<br>value =<br>0.0025) | No significant<br>difference in<br>time from<br>diagnosis to<br>treatment in<br>patients<br>receiving<br>radical<br>therapy    | 5.6<br>5.7 (a)                                                                                                             | Whitehouse Report<br>(56) and National<br>Health Service (NHS)<br>Cancer Plan(6):<br>Urgent GP referral to<br>treatment = 2 months<br>Diagnosis to<br>Treatment for all<br>cancers = 1 month.<br>All conventional arm<br>patient met guidelines<br>on time to LCS and<br>time to treatment but<br>no median interval<br>given. | Two-Step<br>Rapid<br>Diagnostic<br>System at<br>Royal<br>Marsden<br>Hospital |
| 42. | Melling et al.,<br>2002(57) | Retrospective<br>case note<br>analysis<br><br>Yorkshire<br>Cancer<br>Registry<br>database<br>(1993)                                                                           | Lung cancer<br>cases<br>registered with<br>the former                                  | Determine referral<br>practice compared<br>with<br>recommended time<br>intervals                                                                                                                                        | Treatment<br>interval<br><br>GPLCS interval<br><br>Other:<br>LCS to Rx                                                                                                  | N=362<br>M=62.4%<br>Non-Small Cell<br>51.1%, small<br>17.1%, clinical<br>31.8%                                                                                                                                | Median 7<br>days                                                                         |                                                         |                    |     |     |                                                                                                                                   | Median in without<br>diagnosis group =<br>28 days |                                                                                                      | Median LCS<br>to Rx in with<br>diagnosis<br>group =<br>35 days<br><br>Median CXR<br>to LCS<br>referral= 7<br>days              | 4.1<br>3.3 (a)<br>3.3 (c)<br>2.4<br>2.3<br>3.8                                                                             | BTS (2)<br>SMAC (56)<br>SIGN (49)<br><br>Treatment interval =<br>8 weeks if no<br>histological diagnosis;<br>23% met target<br><br>First LCS visit<br>→ Treatment = 8<br>weeks if diagnosis                                                                                                                                    | No                                                                           |

| # | BIBLIOMETRIC<br>S | STUDY<br>DESIGN<br><br>Region, Year | DATA<br>SOURCE | AIMS | OUTCOME<br>MEASURES<br>OF INTEREST<br>/ DEFINITIONS | RESULTS:<br>Patient<br>Demographics | Time intervals in lung cancer pathway by Olesen's definitions <sup>1</sup> or equivalent |                    |                    |     |     |                         |                    |                   | SUGGESTED<br>FACTORS<br>RESPONSIBL<br>E FOR DELAY. | Guidelines applied on<br>target times? | Involvement of<br>Fast Track<br>System? |
|---|-------------------|-------------------------------------|----------------|------|-----------------------------------------------------|-------------------------------------|------------------------------------------------------------------------------------------|--------------------|--------------------|-----|-----|-------------------------|--------------------|-------------------|----------------------------------------------------|----------------------------------------|-----------------------------------------|
|   |                   |                                     |                |      |                                                     |                                     | GP-LCS<br>interval                                                                       | Doctor<br>Interval | System<br>Interval | PCI | SCI | Diagnosti<br>c Interval | Treatment Interval | Total<br>interval | Other<br>relevant<br>intervals /<br>findings       |                                        |                                         |
|   |                   |                                     |                |      |                                                     |                                     |                                                                                          |                    |                    |     |     |                         |                    |                   | Median CXR<br>to LCS visit =<br>17 days            | obtained; 38% within<br>8 weeks        |                                         |

| #   | BIBLIOMETRIC<br>S          | STUDY<br>DESIGN<br><br>Region, Year                                                                                                         | DATA<br>SOURCE                                                                                | AIMS                                                                                                                                                                                                                        | OUTCOME<br>MEASURES<br>OF INTEREST<br>/DEFINITIONS                                                                                                                                                                                                                                                                                 | RESULTS:<br>Patient<br>Demographics                                                                                                                                  | Time intervals in lung cancer pathway by Olesen's definitions <sup>1</sup> or equivalent                                                 |                    |                    |     |                                                                                                                                                                                       |                         |                    |                                                                                                                                                                                                                                                                                                                                                                                                                                                                                                                             | SUGGESTED<br>FACTORS<br>RESPONSIBL<br>E FOR DELAY | Guidelines applied on<br>target times?                                                                                                                                                                                                                                                                        | Involvement of<br>Fast Track<br>System?                                                                       |
|-----|----------------------------|---------------------------------------------------------------------------------------------------------------------------------------------|-----------------------------------------------------------------------------------------------|-----------------------------------------------------------------------------------------------------------------------------------------------------------------------------------------------------------------------------|------------------------------------------------------------------------------------------------------------------------------------------------------------------------------------------------------------------------------------------------------------------------------------------------------------------------------------|----------------------------------------------------------------------------------------------------------------------------------------------------------------------|------------------------------------------------------------------------------------------------------------------------------------------|--------------------|--------------------|-----|---------------------------------------------------------------------------------------------------------------------------------------------------------------------------------------|-------------------------|--------------------|-----------------------------------------------------------------------------------------------------------------------------------------------------------------------------------------------------------------------------------------------------------------------------------------------------------------------------------------------------------------------------------------------------------------------------------------------------------------------------------------------------------------------------|---------------------------------------------------|---------------------------------------------------------------------------------------------------------------------------------------------------------------------------------------------------------------------------------------------------------------------------------------------------------------|---------------------------------------------------------------------------------------------------------------|
|     |                            |                                                                                                                                             |                                                                                               |                                                                                                                                                                                                                             |                                                                                                                                                                                                                                                                                                                                    |                                                                                                                                                                      | GP-LCS<br>interval                                                                                                                       | Doctor<br>interval | System<br>interval | PCI | SCI                                                                                                                                                                                   | Diagnosti<br>c interval | Treatment Interval | Total<br>interval                                                                                                                                                                                                                                                                                                                                                                                                                                                                                                           |                                                   |                                                                                                                                                                                                                                                                                                               |                                                                                                               |
| 43. | Lo et al.,<br>2007(58)     | Ontario,<br>Canada.<br><br>2004- 2005                                                                                                       | Medical<br>records,<br>physician<br>surveys                                                   | Study waiting times<br>pre- and post-<br>implementation of<br>Time to Treat (TTT)<br>Program<br>streamlined referral<br>system from GPs<br>to LCS from first<br>'Suspicion' (clinical<br>OR radiological) of<br>lung cancer | GP-LCS<br>interval<br><br>Other:<br>'Suspicion' to<br>LCS referral<br><br>LCS visit to CT<br>scan<br><br>CT scan to<br>diagnosis<br><br>'Suspicion' to<br>diagnosis                                                                                                                                                                | N in 2004 pre-<br>TTT: 52<br><br>N in 2005 post-<br>TTT: 430<br>Mean age 66<br>yrs                                                                                   | Median pre-<br>TTT = 17<br><br>Median post -<br>TTT = 4                                                                                  |                    |                    |     |                                                                                                                                                                                       |                         |                    | Median<br>Times<br>BEFORE and<br>AFTER TTT<br>program:<br>1. From<br>suspicion to<br>referral to<br>LCS<br>decreased<br>from 20 days<br>to <u>6 days</u><br><br>3. Median<br>LCS visit to<br>CT scan<br>decreased<br>from 52 days<br>to <u>3 days</u> .<br><br>4. Median<br>time from CT<br>scan to<br>diagnosis<br>decreased<br>from<br>39 days to <u>6<br/>days</u> .<br><br>5. Median<br>time from<br>suspicion<br>to diagnosis<br>decreased<br>from 128<br>days to 20<br>days.                                          | 5.3<br>5.5<br>4.1                                 | For TTT program, the<br>target wait time<br>for referral for a LCS<br>consult was ≤ 5 days.<br>The target wait time<br>for CT scan was ≤10<br>days. Ontario<br>Provincial Wait Time<br>Strategy (59)<br>measures time from<br>diagnosis until<br>surgery. The same<br>wait time in this study<br>was 23 days. | Yes: Time to<br>Treat Program<br>implementatio<br>n                                                           |
| 44. | Lewis et al.,<br>2005(60)  | Retrospective<br>audit of<br>medical<br>records<br><br>1999 - 2002                                                                          | Medical<br>records from<br>one site<br>(Nottingham<br>City Hospital)<br>UK<br><br>1999 - 2002 | To examine the<br>impact of the 2-<br>week wait (TWW)<br>principle<br>process on the<br>urgent referral<br>pathway for lung<br>cancer                                                                                       | GP-LCS<br>interval<br><br>Secondary<br>Care interval<br><br>Other:<br>GP referral to<br>diagnosis<br><br>LCS to<br>diagnosis<br><br>All intervals<br>measured for<br>three different<br>time periods<br>(1999 – 2000<br>when DoH<br>guidelines were<br>introduced) and<br>subsequent 24<br>months (2000 –<br>2001, 2001 –<br>2002) | For all:<br>60% male<br>Median age 73<br>years<br>80% NSCLC<br>15% SCLC<br><br>1999 – 2000: N<br>= 286<br><br>2000 – 2001:<br>N = 352<br><br>2001 – 2002: N<br>= 404 | 1999 – 2000:<br>median 7<br>days (0 –<br>124); 2000 –<br>2001:<br>Median 8<br>days (0 –<br>101); 2001 –<br>2002: Median<br>9 days (0-98) |                    |                    |     | 1999 –<br>2000:<br>median<br>37 days<br>(2 –<br>228);<br>2000 –<br>2001:<br>Median<br>41 days<br>(2 –<br>307);<br>2001 –<br>2002:<br>Median<br>42 (0-<br>239)                         |                         |                    | Introduction<br>of TWW<br>principle<br>resulted in<br>patients<br>waiting<br>longer for<br>their first LCS<br>visit. 58%<br>patients<br>referred via<br>TWW<br>scheme.<br><br>GP referral to<br>diagnosis:<br>1999 – 2000:<br>median 26<br>days (0 –<br>228); 2000 –<br>2001:<br>Median 33<br>days (2 –<br>307); 2001 –<br>2002: Median<br>27 (0-300)<br><br>LCS to<br>diagnosis:<br>1999 – 2000:<br>median<br>15days (0 –<br>219); 2000 –<br>2001:<br>Median 21<br>days (0 –<br>294); 2001 –<br>2002: Median<br>15 (0-300) | 5.3<br>5.4<br>2.10                                | 1999 – 2000:<br>Department of Health<br>National Standards<br>Local Action '2-week<br>wait' scheme(6) and<br>NICE guidelines (51)                                                                                                                                                                             |                                                                                                               |
| 45. | Larsen et al.,<br>2013(61) | Retrospective<br>population-<br>based study,<br>in several<br>hospitals in<br>Southern<br>Denmark<br>including<br>Vejle.<br><br>2007 - 2009 | GP<br>Questionnaire<br>s                                                                      | To analyse how the<br>Secondary Care<br>interval<br>changed, in general<br>after the<br>introduction of<br>urgent referral for<br>specific cancers,<br>including lung.                                                      | Secondary<br>Care Interval                                                                                                                                                                                                                                                                                                         | N (Vejle) = 775<br>M 35%<br><br>N (Other) =<br>5743<br>M 51%                                                                                                         |                                                                                                                                          |                    |                    |     | Vejle:<br>SCI<br>before<br>system =<br>median<br>31 days<br>(IQR 20<br>– 41)<br><br>SCI after<br>= median<br>29 days<br>(IQR 23<br>– 65);<br>p=0.39<br><br>Other<br>hospitals<br>:SCI |                         |                    |                                                                                                                                                                                                                                                                                                                                                                                                                                                                                                                             | 5.3<br>1.15<br>2.5 (a)                            |                                                                                                                                                                                                                                                                                                               | Urgent referral<br>system based<br>on alarm<br>symptoms,<br>implemented<br>by Danish<br>government in<br>2008 |

| # | BIBLIOMETRIC<br>S | STUDY<br>DESIGN<br><br>Region, Year | DATA<br>SOURCE | AIMS | OUTCOME<br>MEASURES<br>OF INTEREST<br>/ DEFINITIONS | RESULTS:<br>Patient<br>Demographics | Time intervals in lung cancer pathway by Olesen's definitions <sup>1</sup> or equivalent |                    |                    |     |                                                                                                                      |                         |                    |                   | SUGGESTED<br>FACTORS<br>RESPONSIBL<br>E FOR DELAY. | Guidelines applied on<br>target times? | Involvement of<br>Fast Track<br>System? |
|---|-------------------|-------------------------------------|----------------|------|-----------------------------------------------------|-------------------------------------|------------------------------------------------------------------------------------------|--------------------|--------------------|-----|----------------------------------------------------------------------------------------------------------------------|-------------------------|--------------------|-------------------|----------------------------------------------------|----------------------------------------|-----------------------------------------|
|   |                   |                                     |                |      |                                                     |                                     | GP-LCS<br>interval                                                                       | Doctor<br>Interval | System<br>Interval | PCI | SCI                                                                                                                  | Diagnosti<br>c Interval | Treatment Interval | Total<br>interval | Other<br>relevant<br>intervals /<br>findings       |                                        |                                         |
|   |                   |                                     |                |      |                                                     |                                     |                                                                                          |                    |                    |     | before =<br>median<br>37 days<br>(IQR 21<br>– 64)<br>SCI after<br>= median<br>33 days<br>(IQR 16-<br>53);<br>p=0.008 |                         |                    |                   |                                                    |                                        |                                         |



| #   | BIBLIOMETRIC<br>S            | STUDY<br>DESIGN<br><br>Region, Year                                                                                    | DATA<br>SOURCE                                                                                                                       | AIMS                                                                                                                                                   | OUTCOME<br>MEASURES<br>OF INTEREST<br>/ DEFINITIONS                                                                                                                                                                   | RESULTS:<br>Patient<br>Demographics                                                                                                                                                                                                                                                                                  | Time intervals in lung cancer pathway by Olesen's definitions <sup>1</sup> or equivalent |                                  |                                                                                                                      |     |                                     |                                                                                             |                                    |                                                             | SUGGESTED<br>FACTORS<br>RESPONSIBL<br>E FOR DELAY                                                                                                                                                                                                         | Guidelines applied on<br>target times?                                                                                                                                                                                                                                                                                                                                            | Involvement of<br>Fast Track<br>System? |                                              |
|-----|------------------------------|------------------------------------------------------------------------------------------------------------------------|--------------------------------------------------------------------------------------------------------------------------------------|--------------------------------------------------------------------------------------------------------------------------------------------------------|-----------------------------------------------------------------------------------------------------------------------------------------------------------------------------------------------------------------------|----------------------------------------------------------------------------------------------------------------------------------------------------------------------------------------------------------------------------------------------------------------------------------------------------------------------|------------------------------------------------------------------------------------------|----------------------------------|----------------------------------------------------------------------------------------------------------------------|-----|-------------------------------------|---------------------------------------------------------------------------------------------|------------------------------------|-------------------------------------------------------------|-----------------------------------------------------------------------------------------------------------------------------------------------------------------------------------------------------------------------------------------------------------|-----------------------------------------------------------------------------------------------------------------------------------------------------------------------------------------------------------------------------------------------------------------------------------------------------------------------------------------------------------------------------------|-----------------------------------------|----------------------------------------------|
|     |                              |                                                                                                                        |                                                                                                                                      |                                                                                                                                                        |                                                                                                                                                                                                                       |                                                                                                                                                                                                                                                                                                                      | GP-LCS<br>interval                                                                       | Doctor<br>Interval               | System<br>Interval                                                                                                   | PCI | SCI                                 | Diagnosti<br>c Interval                                                                     | Treatment Interval                 | Total<br>interval                                           |                                                                                                                                                                                                                                                           |                                                                                                                                                                                                                                                                                                                                                                                   |                                         | Other<br>relevant<br>intervals /<br>findings |
| 46. | Largey et al.,<br>2015(62)   | Pilot study of retrospective audit in a single, public outer metropolitan hospital in Victoria, AUS<br><br>2009 - 2010 | Medical records                                                                                                                      | To describe diagnostic pathways undertaken by lung cancer patients and identify variations in referral intervals, in a Australian healthcare settings. | GP-LCS interval<br><br>Diagnostic interval<br><br>Other:<br>First LCS visit to diagnosis<br><br>First LCS visit and MDT                                                                                               | Total N = 25<br>Male 60%<br>Mean age 71 years<br>52% NSCLC<br>20% SCLC<br>28% St IV<br><br>Cohort 1:<br>Patients who presented to a GP and were subsequently referred to a private clinician (n = 12)<br>13<br>Cohort 2:<br>Patients who presented to a GP and were subsequently referred to a public hospital (n=5) | Cohort 1 =<br>Median 7 days (IQR 3 – 30)<br><br>Cohort 2 =<br>Median 0 days (IQR 0)      |                                  |                                                                                                                      |     |                                     | Cohort 1 =<br>Median 19 days (IQR 12 – 36)<br><br>Cohort 2 =<br>Median 20 days (IQR 7 – 47) |                                    |                                                             | LCS to diagnosis interval:<br>Cohort 1 =<br>median 7 days (IQR 1 – 13)<br><br>Cohort 2 =<br>Median 20 days (IQR 7 – 47)<br><br>Patients referred to MDT before diagnosis (n = 4, 16%) experienced the longest median interval to MDT (39 days, IQR 22–51) | 2.7<br>1.21<br>2.3<br>3.4<br>4.5<br>1.14<br>2.11<br>3.9                                                                                                                                                                                                                                                                                                                           | No                                      | No                                           |
| 47. | Krishnasamy et al., 2001(63) | Prospective, national study of patients from 24 hospitals in UK<br><br>2001                                            | Questionnaire survey to patients and carers                                                                                          | To describe patients' carers' perceptions of care following a diagnosis of primary lung cancer                                                         | Doctor Interval<br><br>Other:<br>LCS to diagnosis                                                                                                                                                                     | N = 209 respondents<br>Male = 65%<br>NSCLC = 65%<br><br>Age 61 – 70 years = 41%                                                                                                                                                                                                                                      |                                                                                          | Median 14 days                   |                                                                                                                      |     |                                     |                                                                                             |                                    |                                                             | LCS to diagnosis =<br>median 3 weeks<br><br>4.7<br>5.1<br>3.4<br>3.1<br>4.4<br>1.15<br>2.4<br>4.1<br>5.6                                                                                                                                                  | NHS(6), Yorkshire Thoracic Group (64)and BTS (2) guidelines:<br>First GP visit to CXR =<br>1 week, CXR to LCS visit and confirmation of diagnosis to patients within = 2 weeks.<br>Treatment interval = 4-6 weeks:<br><br>GPLCS: 45% within 2 weeks <u>but no median interval given</u> ,<br>9%within 1-3 months<br><br>Total interval: 14% within 3 weeks, 86% within 1-8 months |                                         |                                              |
| 48. | Koyl et al., 2002(65)        | Prospective study of timelines to diagnosis in 1 hospital in Gävle, Sweden<br><br>1997 -1998                           | Patient questionnaires                                                                                                               | To prospectively measure the delays from both patient and doctors' perspectives                                                                        | GP-LCS interval<br><br>"Specialist delay" / LCS referral receipt to diagnosis<br><br>First LCS visit to surgery / chemotherapy                                                                                        | N = 105<br>Stage IV = 43%<br>NSCLC = 62%<br>84 (62.7%) men and 50 (37.3%) women. Mean age in men was 71.6 years and in women 69.8 years                                                                                                                                                                              | 33 days (range 0 – 477)                                                                  |                                  |                                                                                                                      |     |                                     |                                                                                             |                                    |                                                             | LCS to Dx= 9 days (range 0-720)<br><br>Median LCS visit to surgery / chemotherapy = 31 days / 24 days respectively<br><br>1.9<br>3.1<br>4.7<br>1.6<br>2.8<br>2.3<br>2.2                                                                                   | None specified                                                                                                                                                                                                                                                                                                                                                                    | No                                      |                                              |
| 49. | Jiwa et al., 2010(66)        | Database survey, data linkage and postal survey<br><br>2006 - 2007                                                     | Western Australian Data Linkage System (WADLS), Lung Cancer Management System (LCMS) and Open Patient Administration System (TOPAS®) | To plot the trajectory of lung cancer patients by linking multiple data sources in Western Australia                                                   | PCI                                                                                                                                                                                                                   | 47 GPs                                                                                                                                                                                                                                                                                                               |                                                                                          |                                  | Median 1.2 weeks (range 1- 30weeks) (GP survey)                                                                      |     |                                     |                                                                                             |                                    |                                                             |                                                                                                                                                                                                                                                           | 1.11<br>1.14<br>1.15                                                                                                                                                                                                                                                                                                                                                              |                                         |                                              |
| 50. | Hansen et al., 2011(67)      | Population-based cohort study<br><br>Denmark, 2004 – 2005                                                              | Registries and GP questionnaires by GP, County of Aarhus, Denmark                                                                    | Explore patient-GP and system related delay in the interval from first cancer symptom to diagnosis and treatment                                       | Doctor Interval<br>System Interval<br>Secondary Care Interval<br>Treatment interval<br><br>'Delay encountered in the primary health care (PHC) sector' = GP-initiated investigation until referral<br><br>'Diagnostic | N=328                                                                                                                                                                                                                                                                                                                |                                                                                          | Median 0 days<br>IQI 0-9 (n=251) | Median 69 days<br>IQI 47-96 (n=182)<br><br>System interval when GP not involved = median 51 days<br>IQI 27-76 (n=40) |     | Median 55 days<br>IQI 36-79 (n=181) |                                                                                             | Median 23 days<br>IQI 8-36 (n=182) | Total system delay<br>median 108 days<br>IQI 82-167 (n=128) | Delay encountered in PHC = median 7 days<br>IQI 0-18 (n=250)<br><br>Diagnostic delay in SHC = median 27 days<br>IQI 14-46 (n=246)                                                                                                                         | 4.1<br>3.1<br>5.7 (a)                                                                                                                                                                                                                                                                                                                                                             |                                         |                                              |

| #   | BIBLIOMETRIC<br>S                           | STUDY<br>DESIGN<br><br>Region, Year                                                  | DATA<br>SOURCE                                                                                                                                 | AIMS                                                                                                                                                                                                     | OUTCOME<br>MEASURES<br>OF INTEREST<br>/ DEFINITIONS                                                                                                                      | RESULTS:<br>Patient<br>Demographics                                                                                          | Time intervals in lung cancer pathway by Olesen's definitions <sup>1</sup> or equivalent |                    |                    |                                       |                                      |                                      |                               |                                                                                                       | SUGGESTED<br>FACTORS<br>RESPONSIBL<br>E FOR DELAY                                                    | Guidelines applied on<br>target times?                                               | Involvement of<br>Fast Track<br>System?                                                                                                        |                                              |
|-----|---------------------------------------------|--------------------------------------------------------------------------------------|------------------------------------------------------------------------------------------------------------------------------------------------|----------------------------------------------------------------------------------------------------------------------------------------------------------------------------------------------------------|--------------------------------------------------------------------------------------------------------------------------------------------------------------------------|------------------------------------------------------------------------------------------------------------------------------|------------------------------------------------------------------------------------------|--------------------|--------------------|---------------------------------------|--------------------------------------|--------------------------------------|-------------------------------|-------------------------------------------------------------------------------------------------------|------------------------------------------------------------------------------------------------------|--------------------------------------------------------------------------------------|------------------------------------------------------------------------------------------------------------------------------------------------|----------------------------------------------|
|     |                                             |                                                                                      |                                                                                                                                                |                                                                                                                                                                                                          |                                                                                                                                                                          |                                                                                                                              | GP-LCS<br>interval                                                                       | Doctor<br>Interval | System<br>Interval | PCI                                   | SCI                                  | Diagnosti<br>c interval              | Treatment Interval            | Total<br>interval                                                                                     |                                                                                                      |                                                                                      |                                                                                                                                                | Other<br>relevant<br>intervals /<br>findings |
|     |                                             |                                                                                      |                                                                                                                                                |                                                                                                                                                                                                          | delay in<br>secondary<br>health care<br>(SHC) sector'<br>(Referral to<br>SHC to<br>Diagnosis)                                                                            |                                                                                                                              |                                                                                          |                    |                    |                                       |                                      |                                      |                               |                                                                                                       |                                                                                                      |                                                                                      |                                                                                                                                                |                                              |
| 51. | Gonzalez-<br>Barcala et al.,<br>2014(68)    | Observational<br>retrospective<br>study<br><br>Pontevedra,<br>Spain , 2005 -<br>2008 | Complexo<br>Hospitalario<br>de<br>Pontevedra,<br>(CHOP)<br>database                                                                            | To analyse the<br>delays in the<br>diagnosis and<br>treatment<br>of lung cancer,<br>factors associated<br>with the<br>timeliness of care<br>and possible<br>relationship with<br>survival.               | Treatment<br>interval<br><br>Other:<br>Diagnosis delay<br>= First LCS to<br>diagnosis<br><br>Hospital delay<br>= LCS to<br>treatment                                     | N=307<br>Male 87.1%                                                                                                          |                                                                                          |                    |                    |                                       |                                      | Median n=14 days                     |                               | Median<br>Diagnosis<br>delay =18<br>days<br><br>Median<br>hospital delay<br>=35 days                  | 1.2 (b)<br>1.5 (a)<br>1.7 (a)<br>1.13<br>1.10<br>1.15<br>3.3 (a)<br>3.5                              | BTS: median 18 days<br>exceeds the 2 weeks<br>delay recommended                      |                                                                                                                                                |                                              |
| 52. | Gonzalez et al.,<br>2003(69)                | Prospective<br>observational<br>study<br><br>2000 - 2001                             | Hospital<br>medical<br>records,<br>Hospital<br>Universitario<br>de<br>Salamanca,<br>Spain                                                      | To study the clinical<br>and demographic<br>factors<br>associated with<br>delays in the<br>diagnosis of lung<br>cancer                                                                                   | Diagnostic<br>interval<br><br>Other:<br>LCS to Dx<br>(Diagnostic<br>period)<br><br>First clinical<br>presentation to<br>first LCS visit<br>(defined as<br>Middle Period) | N= 113<br>Mean age 65yrs<br>Male 91.1%<br>93% smokers                                                                        |                                                                                          |                    |                    |                                       |                                      | Range =<br>5 – 377                   |                               | Middle Period<br>mean = 37.9<br>days (SD 63)<br><br>Diagnostic<br>period<br>mean=18.6<br>days (SD 19) | 1.10 (d)<br>2.3<br>2.7<br>4.1<br>4.5<br>1.18 (b)<br>2.0<br>3.7<br>2.12<br>5.6                        |                                                                                      |                                                                                                                                                |                                              |
| 53. | Gomez et al.,<br>2014(70)                   | Population<br>based study<br>US, 2004 -<br>2007                                      | Surveillance,<br>Epidemiology,<br>and End<br>Results<br>(SEER)-<br>Medicare and<br>Texas Cancer<br>Registry<br>(TCR)-<br>Medicare<br>databases | To determine if<br>predictors of<br>treatment delay<br>after diagnosis<br>were associated<br>with prognosis                                                                                              | Treatment<br>Interval                                                                                                                                                    | N= 28,732<br>diagnosed with<br>NSCLC in<br>2004–2007<br>Age ≥66yrs                                                           |                                                                                          |                    |                    |                                       |                                      |                                      | Median 27 days                |                                                                                                       | 1.1<br>1.2 (a)<br>1.4<br>1.7 (a)<br>1.10<br>3.3 (d)<br>4.8                                           | Yes: Treatment<br>interval should be <35<br>days (71) – 37%<br>patients faced delays |                                                                                                                                                |                                              |
| 54. | Forrest et al.,<br>2015(72)                 | UK,<br>2006 - 2010                                                                   | Northern and<br>Yorkshire<br>Cancer<br>Registry,<br>Hospital<br>Episode<br>Statistics and<br>lung cancer<br>audit data sets                    | Investigate the<br>factors that may<br>influence the<br>likelihood of post-<br>Primary Care<br>referral, diagnosis<br>and treatment<br>within target times.                                              | GP-LCS<br>interval<br><br>Treatment<br>interval<br><br>Secondary<br>Care<br><br>Other:<br>GPReferral to<br>Dx<br><br>LCS to Dx                                           | N = 28733<br>61% NSCLC<br>13% SCLC<br>54% male<br>16% Stage IV<br><br>No information<br>on proportion of<br>urgent referrals | Median 10<br>days, IQR 6 -<br>17                                                         |                    |                    |                                       | median<br>56 days<br>(IQR 39–<br>79) |                                      | median 35 days<br>(IQR 21–55) |                                                                                                       | GP referral to<br>Dx Median 13<br>days (IQR 7 –<br>24)<br><br>Median LCS<br>to Dx = 0<br>(IQR 0 – 0) | 1.5 (a) and (b)<br>1.13<br>1.17 (a)<br>1.15<br>1.2 (a)<br>3.3 (a)                    | NHS (6) 70% within<br>GPLCS interval, 43%<br>within Trmt Int target,<br>61% within SCI target<br><br>91% within LCS to Dx<br>target of 17 days |                                              |
| 55. | Fernandez de la<br>Vega et al.,<br>2015(73) | Retrospective<br>descriptive<br>stud<br>Havana, Cuba<br>2007 - 2010                  | Administrative<br>data                                                                                                                         | to assess lung<br>cancer diagnostic<br>delay and to identify<br>its various<br>components                                                                                                                | Other:<br>LCS to Dx<br><br>GP visit to LCS<br>visit                                                                                                                      | N 54<br>74% male                                                                                                             |                                                                                          |                    |                    |                                       |                                      |                                      |                               |                                                                                                       | LCS to Dx =<br>31.3 days<br><br>GP visit to<br>LCS visit =<br>16.2 days                              | 2.8<br>4.5<br>5.9<br>3.1                                                             | Yes but arbitrary and<br>set by authors.                                                                                                       |                                              |
| 56. | Emery et al.,<br>2013(74)                   | Mixed<br>methods study<br>2009 - 2010                                                | Patient<br>interviews and<br>medical<br>records                                                                                                | to explore factors<br>contributing to<br>longer diagnostic<br>intervals in rural<br>cancer patients in<br>Western Australia<br>(WA), comparing<br>intervals between<br>common cancers,<br>including lung | Primary Care<br>Interval<br><br>GPLCS interval<br><br>Diagnostic<br>interval<br><br>Other:<br>LCS to Dx                                                                  | N = 8<br><br>Mean age 60.5<br>years                                                                                          | 2(IQR -0 – 22)                                                                           |                    |                    | 9 (IQR 0 –<br>103)                    |                                      | Median<br>22 days<br>(IQR 0 –<br>38) |                               |                                                                                                       | Median LCS<br>to Dx = 11<br>days (IQR 7 –<br>15)                                                     | 1.15<br>4.2<br>4.5<br>3.11 (a)<br>1.13                                               |                                                                                                                                                |                                              |
| 57. | Ellis et al.,<br>2011(75)                   | Prospective<br>study<br><br>Ontario,<br>Canada<br><br>2010                           | Structured<br>telephone<br>interviews with<br>patients and<br>medical<br>records                                                               | to examine the<br>trajectory of<br>patients from onset<br>of symptoms, initial<br>presentation,<br>diagnostic work up<br>and referral to a<br>regional cancer<br>centre.                                 | Primary Care<br>Interval<br><br><br><br>Other:<br>LCS to Rx                                                                                                              | N = 56<br>Median age 68<br>yr<br>77% NSCLC<br>23% SCLC<br>6% Stage I<br>29% Stage IV<br>58% male                             |                                                                                          |                    |                    | Median 27<br>days<br>(IQR 12 –<br>49) |                                      |                                      |                               |                                                                                                       | Median LCS<br>to Rx = 11<br>days (IQR<br>2.5 – 28)                                                   | 1.15<br>2.12<br>4.1<br>3.7<br>2.4<br>5.6<br>4.4                                      |                                                                                                                                                |                                              |
| 58. | Dregan et al.,<br>2013(76)                  | Cohort study<br>UK2002 –<br>2006                                                     | UK Clinical<br>Practice<br>Research<br>Database<br>(CPRD) with<br>linked Cancer<br>Registry (CR)<br>data in 158<br>general<br>practices        | To evaluate<br>diagnostic time<br>intervals, and<br>consultation<br>patterns after<br>clinical presentation<br>with alarm<br>symptoms                                                                    | Diagnostic<br>interval                                                                                                                                                   | N = 215                                                                                                                      |                                                                                          |                    |                    |                                       |                                      | 35 (IQR<br>18 – 89)                  |                               |                                                                                                       | 2.4                                                                                                  |                                                                                      |                                                                                                                                                |                                              |

| #   | BIBLIOMETRIC<br>S              | STUDY<br>DESIGN<br><br>Region, Year                                                      | DATA<br>SOURCE                                                                                   | AIMS                                                                                                                                                                                        | OUTCOME<br>MEASURES<br>OF INTEREST<br>/ DEFINITIONS                                               | RESULTS:<br>Patient<br>Demographics                                                                                                                               | Time intervals in lung cancer pathway by Olesen's definitions <sup>1</sup> or equivalent |                                   |                    |                             |                                                          |                                                                  |                        |                                                                    | SUGGESTED<br>FACTORS<br>RESPONSIBL<br>E FOR DELAY                                          | Guidelines applied on<br>target times?                            | Involvement of<br>Fast Track<br>System?                                                                     |                                              |
|-----|--------------------------------|------------------------------------------------------------------------------------------|--------------------------------------------------------------------------------------------------|---------------------------------------------------------------------------------------------------------------------------------------------------------------------------------------------|---------------------------------------------------------------------------------------------------|-------------------------------------------------------------------------------------------------------------------------------------------------------------------|------------------------------------------------------------------------------------------|-----------------------------------|--------------------|-----------------------------|----------------------------------------------------------|------------------------------------------------------------------|------------------------|--------------------------------------------------------------------|--------------------------------------------------------------------------------------------|-------------------------------------------------------------------|-------------------------------------------------------------------------------------------------------------|----------------------------------------------|
|     |                                |                                                                                          |                                                                                                  |                                                                                                                                                                                             |                                                                                                   |                                                                                                                                                                   | GP-LCS<br>interval                                                                       | Doctor<br>Interval                | System<br>Interval | PCI                         | SCI                                                      | Diagnosti<br>c Interval                                          | Treatment Interval     | Total<br>interval                                                  |                                                                                            |                                                                   |                                                                                                             | Other<br>relevant<br>intervals /<br>findings |
| 59. | Devbhandari et al., 2008(77)   | Prospective tracking study<br><br>UK<br>2003 - 2005                                      | Medical records                                                                                  | To assess how bronchoscopy results affected waiting times to lung cancer treatment in patients referred by standard (via GP) and non-standard referral pathways                             | GP-LCS interval<br><br>Secondary Care interval<br><br>Treatment interval<br><br>Other: L CS to Dx | Mean age 68 years<br>N = 92 bronch pos (BP)<br>N = 94 bronch neg (BN)<br>BP:<br>73% male<br>25% SCLC<br>72% NSCLC<br><br>BN:<br>52% male<br>12% SCLC<br>51% NSCLC | BP: Median 1 day (IQR 0 – 5)<br><br>BN: Median 1 day (IQR 0 – 4)                         |                                   |                    |                             | BP: Median 45 (IQR 37 – 60)<br><br>BN: Med 75 (54 – 107) | BP: Median 8 (IQR 4 – 13)<br><br>BN: Med 12 (6 – 25)             |                        | Other: L CS to Dx:<br><br>BP: 33 (24 – 40)<br><br>BN: 57 (40 – 90) | 4.6<br>4.1<br>3.1<br>3.6<br>4.4<br>4.7                                                     | NHS (6)                                                           | Yes: 2-week wait for urgent referrals                                                                       |                                              |
| 60. | Devbhandari et al., 2007(78)   | Prospective tracking study<br>UK<br>2003 - 2005                                          | Medical records                                                                                  |                                                                                                                                                                                             | GPLCS interval<br>Secondary Care interval                                                         | N 247<br>64% male<br>69% NSCLC<br>13% SCLC<br>Stage IV 65%<br>Stage I 13.8%                                                                                       | Median 1 (IQ 0-5)                                                                        |                                   |                    |                             | Median 60 days (IQR 44 – 85)                             |                                                                  |                        |                                                                    | 4.1<br>4.6<br>4.8<br>3.3 (c)<br>1.6<br>4.7<br>1.18                                         | NHS (6)                                                           | Yes: 2-week wait for urgent referrals                                                                       |                                              |
| 61. | Comer et al., 2005(79)         | Exploratory retrospective study<br><br>UK<br>2005                                        | Patient interviews and medical records                                                           | to explore the pathway to diagnosis among a group of patients recently diagnosed with lung cancer.                                                                                          | Diagnostic interval                                                                               | N 22<br><br>55% Male<br>Median age 58 yrs<br>68% NSCLC<br>18% SCLC                                                                                                |                                                                                          |                                   |                    |                             |                                                          | Median 2 months (62 days), range 0.5 to 8 months (16 - 248 days) |                        |                                                                    | 1.0<br>1.15<br>1.16                                                                        |                                                                   |                                                                                                             |                                              |
| 62. | Comber et al., 2005(80)        | Exploratory study<br><br>1999<br>Ireland                                                 | Medical records                                                                                  | to test if there were significant differences in waiting times between health board administrative areas for four common cancers                                                            | GP LCS interval<br><br>Secondary Care interval<br><br>Other: LCS to Rx                            | NONE AVAILABLE                                                                                                                                                    | Median 1 (IQR 3 – 17)                                                                    |                                   |                    |                             | Median 54 (IQR 28 – 100)                                 |                                                                  |                        |                                                                    | LCS to Rx<br>Median 40 (IQR 17 – 85)                                                       | 1.10                                                              |                                                                                                             |                                              |
| 63. | Campbell et al., 2002(81)      | Historical cohort study<br>1995 – 1996<br>Scotland                                       | Cancer registry and medical records                                                              | To explore if variations in time to treatment of colorectal and lung cancer with socio-economic deprivation and urban/rural residence                                                       | Secondary Care                                                                                    | N 661<br>62% male<br>63% NSCLC<br>14% SCLC                                                                                                                        |                                                                                          |                                   |                    |                             | Median 34 days                                           |                                                                  |                        |                                                                    |                                                                                            | 1.18 (b)<br>1.0<br>2.0                                            | NHS (6)                                                                                                     |                                              |
| 64. | Bozcuk et al., 2001(82)        | Retrospective review<br><br>1998, UK                                                     | Medical records                                                                                  | To analyse survival in relation both to time to treatment (hospital delay) and other known prognosticators, in a cohort of NSCLC patients                                                   | GPLCS interval<br><br>Secondary Care                                                              | N 189<br>100% NSCLC<br>71% male<br>31% Stage IV<br>12% Stage I<br>Age 70 yrs                                                                                      | Median 11 days                                                                           |                                   |                    |                             | Median 48 days                                           |                                                                  |                        |                                                                    |                                                                                            | 1.15<br>3.7<br>3.1                                                |                                                                                                             |                                              |
| 65. | Bjerager et al., 2006(83)      | Population based observational case series<br><br><br>Denmark, 2003                      | Telephone interviews with GPs and patients                                                       | To explore diagnostic delay in primary health care among patients with lung cancer                                                                                                          | Primary Care interval<br><br>Doctor Interval (Doctor delay + system delay)                        | N = 84<br><br>Median age 66 years<br><br>64% male                                                                                                                 |                                                                                          | Median = 11 days + median 14 days |                    | Median 33 days (IQI 12–68). |                                                          |                                                                  |                        |                                                                    | Where the GP's first action did not lead to a diagnosis = 45-day median delay (IQI 28–111) | 4.2 (a)<br>4.1<br>3.4<br>4.4<br>2.4<br>4.3<br>2.1<br>1.10<br>2.12 | None specified                                                                                              | No                                           |
| 66. | Baughan et al., 2009(84)       | Scotland 2005 - 2008                                                                     | Primary Care audit of cancer referrals                                                           | to gain a better understanding of how quickly patients with cancer initially present to their GP, and how they are then referred to Secondary Care for further investigation and treatment. | PCI                                                                                               | N 981                                                                                                                                                             |                                                                                          |                                   |                    | Median 11 days (IQR 28)     |                                                          |                                                                  |                        |                                                                    |                                                                                            | 5.3<br>2.3<br>2.5 (a)<br>1.15                                     | NHS (85) and Scottish SEHD(86) for SCI.                                                                     |                                              |
| 67. | Barrett et al., 2008(87)       | Retrospective case control study<br><br><br>UK, 1998 - 2002                              | Medical records                                                                                  | To map pathways from first symptom to diagnosis                                                                                                                                             | Primary Care<br><br>Diagnostic interval                                                           | N 246<br><br>70% male<br>Mean age 72 years                                                                                                                        |                                                                                          |                                   |                    | Median 52 (IQR 7 – 243)     |                                                          | Median 121 (IQR 53 – 261)                                        |                        |                                                                    |                                                                                            | 3.1<br>3.7<br>5.3<br>2.3                                          | NICE (88)                                                                                                   |                                              |
| 68. | Aragoneses FG et al., 2002(89) | Retrospective study using prospectively registered data<br><br>1993 – 1997, Madrid Spain | Medical records in Bronchogenic Carcinoma Cooperative Group of the Spanish Society of Pneumology | To analyse the effect of therapeutic delay on the survival of patients with clinical stage I and II NSCLC carcinoma, who underwent surgical intervention                                    | Treatment interval                                                                                | 1082 patients<br><br>Median age 65 yrs<br><br>Stage I 61%                                                                                                         |                                                                                          |                                   |                    |                             |                                                          |                                                                  | Median 35 days (1–154) |                                                                    |                                                                                            | 3.3(a)<br>1.9<br>4.7<br>4.8<br>5.6                                | CHART steering committee (90): the sum of the diagnostic and therapeutic delay should not exceed 6–8 weeks. | No                                           |

| #   | BIBLIOMETRIC<br>S             | STUDY<br>DESIGN<br><br>Region, Year                                                                                                                                                        | DATA<br>SOURCE                                     | AIMS                                                                                                                                                                                                           | OUTCOME<br>MEASURES<br>OF INTEREST<br>/ DEFINITIONS                                        | RESULTS:<br>Patient<br>Demographics                                                                                                                                                                                                      | Time intervals in lung cancer pathway by Olesen's definitions <sup>1</sup> or equivalent |                                       |                                                                                             |     |                                       |                                                                                                 |                        |                                                                                                               |                                                                                 | SUGGESTED<br>FACTORS<br>RESPONSIBL<br>E FOR DELAY                                                                                                                              | Guidelines applied on<br>target times?                                                                                                                                                    | Involvement of<br>Fast Track<br>System? |
|-----|-------------------------------|--------------------------------------------------------------------------------------------------------------------------------------------------------------------------------------------|----------------------------------------------------|----------------------------------------------------------------------------------------------------------------------------------------------------------------------------------------------------------------|--------------------------------------------------------------------------------------------|------------------------------------------------------------------------------------------------------------------------------------------------------------------------------------------------------------------------------------------|------------------------------------------------------------------------------------------|---------------------------------------|---------------------------------------------------------------------------------------------|-----|---------------------------------------|-------------------------------------------------------------------------------------------------|------------------------|---------------------------------------------------------------------------------------------------------------|---------------------------------------------------------------------------------|--------------------------------------------------------------------------------------------------------------------------------------------------------------------------------|-------------------------------------------------------------------------------------------------------------------------------------------------------------------------------------------|-----------------------------------------|
|     |                               |                                                                                                                                                                                            |                                                    |                                                                                                                                                                                                                |                                                                                            |                                                                                                                                                                                                                                          | GP-LCS<br>interval                                                                       | Doctor<br>Interval                    | System<br>Interval                                                                          | PCI | SCI                                   | Diagnosti<br>c Interval                                                                         | Treatment Interval     | Total<br>interval                                                                                             | Other<br>relevant<br>intervals /<br>findings                                    |                                                                                                                                                                                |                                                                                                                                                                                           |                                         |
|     |                               |                                                                                                                                                                                            | and Thoracic<br>Surgery<br>(GCCB-S)<br>registry.   |                                                                                                                                                                                                                |                                                                                            |                                                                                                                                                                                                                                          |                                                                                          |                                       |                                                                                             |     |                                       |                                                                                                 |                        |                                                                                                               |                                                                                 |                                                                                                                                                                                |                                                                                                                                                                                           |                                         |
| 69. | Alsamarai et<br>al., 2013(91) | Retrospective<br>cohort analysis<br>Veteran Affairs<br>Connecticut<br>Healthcare<br>System<br><br>USA, 2005 –<br>2010<br><br>Before CCCP:<br>2005 – 2007<br><br>After CCCP:<br>2007 - 2010 | Medical<br>records                                 | Compare timeliness<br>and stage at<br>diagnosis before<br>and after<br>implementation of<br>Cancer Care<br>Coordination<br>Program (CCCP)                                                                      | System Interval<br><br>Treatment<br>Interval                                               | 352 patients<br>total<br><br><u>Before CCCP:</u><br>N 163<br>99% male<br>Average age 69<br>years<br>Stage I 23%<br>Stage IV 37%<br><br><u>After CCCP:</u><br>N 189<br>95% male<br>Average age 69<br>years<br>Stage I 41%<br>Stage IV 30% |                                                                                          |                                       | Median<br>78 days<br>(range 1 –<br>757)<br><br>Mean<br>before:126<br><br>Mean<br>after: 101 |     |                                       | Median 28 days (0<br>– 265)<br><br>Mean 40 for all<br><br>Mean before: 46<br><br>Mean after: 43 |                        | Image to<br>Diagnosis:<br>median 37d<br>(range 0 –<br>757)<br><br>Mean before:<br>76<br><br>Mean after:<br>53 | 1.10 (a)<br>1.10 (b)<br>1.15<br>1.13<br>1.4 (a)<br>5.5<br>5.6<br>5.1<br>3.3 (a) | RAND<br>cooperation                                                                                                                                                            | CCCP resulted<br>in significantly<br>reducing<br>disparities in<br>Treatment<br>Intervals for<br>white vs non-<br>white and<br>substance<br>abusers vs<br>non-abusers                     |                                         |
| 70. | Gulbrandt et<br>al., 2015(92) | Cluster<br>randomised,<br>controlled,<br>two-arm (1:1)<br>unblinded trial<br><br>Aarhus,<br>Denmark 2011<br>- 2013                                                                         | National<br>registries and<br>GP<br>questionnaires | to evaluate the<br>effect of direct<br>access to low-dose<br>computed<br>tomography (LDCT)<br>from general<br>practice in early<br>lung cancer<br>detection on time to<br>diagnosis and stage<br>at diagnosis. | Primary Care<br>interval<br><br>Diagnostic<br>interval                                     | N = 331<br><br>47.4% male<br>52.6% female<br>Mean age 69.6<br>years<br><br>58.6% Stage<br>IIIB/IV                                                                                                                                        |                                                                                          |                                       | Median<br>16 days<br>(IQI 4–56)                                                             |     | Median<br>39 days<br>(IQI 17 –<br>93) |                                                                                                 |                        |                                                                                                               | 2.3<br>2.4<br>4.5<br>4.2 (a)<br>5.6                                             |                                                                                                                                                                                | Direct access<br>to fast low-<br>dose chest CT<br>combined with<br>specific<br>training                                                                                                   |                                         |
| 71. | Gulbrandt et<br>al., 2015(93) | National<br>registry-based<br>cohort study<br><br>Aarhus,<br>Denmark,<br>2010                                                                                                              | National<br>registries and<br>GP<br>questionnaires | Describe the routes<br>to diagnosis, the<br>diagnostic activity<br>preceding diagnosis<br>and the diagnostic<br>intervals for lung<br>cancer                                                                   | Primary Care<br>interval<br><br>Diagnostic<br>interval                                     | N 971                                                                                                                                                                                                                                    |                                                                                          |                                       | Median<br>7 days (IQI<br>0–30)                                                              |     | Median<br>29 days<br>(IQI 12–<br>69)  |                                                                                                 |                        |                                                                                                               | 1.1<br>1.2 (a)<br>2.4<br>2.3<br>5.6<br>1.13<br>1.15                             |                                                                                                                                                                                | Yes: fast-track<br>system for<br>suspected<br>lung cancer<br>patients to be<br>dse within 3<br>days                                                                                       |                                         |
| 72. | Verma et al.,<br>2015(94)     | Retrospective<br>review<br><br>2012 – 2014<br><br>Singapore                                                                                                                                |                                                    | To assess<br>timeliness of lung<br>cancer<br>management, and<br>causes for delays.                                                                                                                             | System interval<br><br>Diagnostic<br>interval<br><br>Total interval<br><br>Doctor Interval | N 202<br>13% SCLC<br>60% NSCLC                                                                                                                                                                                                           |                                                                                          | Median<br>13<br>(range<br>1 –<br>399) | Mean 56<br>(6 – 192)                                                                        |     |                                       |                                                                                                 | Median 35 (1 –<br>150) | Median 74<br>(range 2 –<br>438)                                                                               |                                                                                 | 2.1<br>1.11<br>4.2<br>1.20<br>1.10<br>4.8<br>3.3 (a)<br>4.4<br>1.17 (a)<br>1.2 (a)<br>1.7 (b)<br>3.3 (c)<br>4.7<br>1.19 (b)<br>4.5<br>4.6<br>3.7<br>3.6<br>5.6<br>1.13<br>1.15 | Yes: NHS(6) , RAND<br>(26), Swedish Lung<br>Cancer Registry<br>(35)and Danish<br>quality indicators: if<br>System Interval <60<br>days, 36% waited > 8<br>weeks target System<br>Interval |                                         |
| 73. | Annakkaya et<br>al., 2007(95) | Peospective<br>tracking study<br><br>Turkey 2002 -<br>2005                                                                                                                                 | Medical<br>records and<br>patient<br>interviews    | to evaluate the<br>impact of the<br>delayed diagnosis<br>of lung cancer on<br>tumor stage and<br>patient survival and<br>to compare the<br>results with those of                                               | Diagnostic<br>interval<br><br>Treatment<br>interval                                        | N 103<br>63 years<br>93% male<br>76% NSCLC<br>26% SCLC<br>40% StIV                                                                                                                                                                       |                                                                                          |                                       |                                                                                             |     |                                       | Median<br>10 days                                                                               | Median 12 days         |                                                                                                               | 1.15<br>1.1<br>1.13<br>5.6<br>1.17 (a)<br>1.10                                  | No                                                                                                                                                                             | No                                                                                                                                                                                        |                                         |

| #   | BIBLIOMETRIC<br>S              | STUDY<br>DESIGN<br><br>Region, Year                                                                                         | DATA<br>SOURCE                                                                                                                                        | AIMS                                                                                                                                                                                                                                                                                                                                                                                                               | OUTCOME<br>MEASURES<br>OF INTEREST<br>/ DEFINITIONS                                                                                    | RESULTS:<br>Patient<br>Demographics                                                                                                                   | Time intervals in lung cancer pathway by Olesen's definitions <sup>1</sup> or equivalent |                    |                                     |              |                 |                                                      |                                               | SUGGESTED<br>FACTORS<br>RESPONSIBL<br>E FOR DELAY.                                                                                                                                           | Guidelines applied on<br>target times?                    | Involvement of<br>Fast Track<br>System?                                                                                                                                                                   |                                                                                                                                                                                        |                                                                                                         |
|-----|--------------------------------|-----------------------------------------------------------------------------------------------------------------------------|-------------------------------------------------------------------------------------------------------------------------------------------------------|--------------------------------------------------------------------------------------------------------------------------------------------------------------------------------------------------------------------------------------------------------------------------------------------------------------------------------------------------------------------------------------------------------------------|----------------------------------------------------------------------------------------------------------------------------------------|-------------------------------------------------------------------------------------------------------------------------------------------------------|------------------------------------------------------------------------------------------|--------------------|-------------------------------------|--------------|-----------------|------------------------------------------------------|-----------------------------------------------|----------------------------------------------------------------------------------------------------------------------------------------------------------------------------------------------|-----------------------------------------------------------|-----------------------------------------------------------------------------------------------------------------------------------------------------------------------------------------------------------|----------------------------------------------------------------------------------------------------------------------------------------------------------------------------------------|---------------------------------------------------------------------------------------------------------|
|     |                                |                                                                                                                             |                                                                                                                                                       |                                                                                                                                                                                                                                                                                                                                                                                                                    |                                                                                                                                        |                                                                                                                                                       | GP-LCS<br>interval                                                                       | Doctor<br>Interval | System<br>Interval                  | PCI          | SCI             | Diagnosti<br>c Interval                              | Treatment Interval                            |                                                                                                                                                                                              |                                                           |                                                                                                                                                                                                           | Total<br>interval                                                                                                                                                                      | Other<br>relevant<br>intervals /<br>findings                                                            |
|     |                                |                                                                                                                             |                                                                                                                                                       | previous studies.                                                                                                                                                                                                                                                                                                                                                                                                  |                                                                                                                                        |                                                                                                                                                       |                                                                                          |                    |                                     |              |                 |                                                      |                                               |                                                                                                                                                                                              |                                                           |                                                                                                                                                                                                           |                                                                                                                                                                                        |                                                                                                         |
| 74. | Bardell et al.,<br>2006(96)    | Retrospective<br>study<br>Denmark,<br>1994 - 1995                                                                           | Medical<br>records                                                                                                                                    | to study the<br>correlation between<br>diagnostic delay<br>and the stage of the<br>lung cancer at the<br>time of operation.                                                                                                                                                                                                                                                                                        | Total interval                                                                                                                         | N 172<br>65% male                                                                                                                                     |                                                                                          |                    |                                     |              |                 |                                                      | Median 60<br>days (IQR<br>28 – 620)           |                                                                                                                                                                                              | 1.0<br>1.15<br>1.13<br>2.2                                | No                                                                                                                                                                                                        | No                                                                                                                                                                                     |                                                                                                         |
| 75. | Diaconescu et<br>al., 2011(97) | Retrospective<br>analysis<br><br>Canada                                                                                     | Cancer<br>registry /<br>tumour board<br>and patient<br>charts<br>2005 – 2007                                                                          | To evaluating<br>several prognostic<br>factors, including<br>treatment delays in<br>lung cancer                                                                                                                                                                                                                                                                                                                    | System Interval                                                                                                                        | N 480<br>85% NSCLC<br>15% SCLC                                                                                                                        |                                                                                          |                    | Median 62<br>(IQR 30 –<br>108)      |              |                 |                                                      |                                               |                                                                                                                                                                                              | 1.13<br>3.4<br>4.1<br>3.1<br>4.6<br>4.7<br>4.8            |                                                                                                                                                                                                           |                                                                                                                                                                                        |                                                                                                         |
| 76. | Dische et al.,<br>1996(90)     | Prospective<br>study<br><br>10 UK and 3<br>non-UK<br>centres<br>1993 - 1994                                                 |                                                                                                                                                       | to determine the<br>interval between<br>first report<br>ofsymptoms and<br>first radiotherapy<br>treatment in<br>patients with<br>NSCLC                                                                                                                                                                                                                                                                             | Treatment<br>interval<br><br>Other:<br>First GP visit to<br>First LCS<br><br>LCS to Dx<br><br>LCS to Rx                                | 524 patients<br><br>74% male<br>80% Stage IV<br>100% NSCLC                                                                                            |                                                                                          |                    |                                     |              |                 | Median 5 weeks<br>(35 days)(IQR<br>21days – 63 days) |                                               | LCS to Dx:<br>median 21<br>days (7 to 42<br>days)<br><br>LCS to Rx =<br>median 7<br>days (7 to 21<br>days)<br><br>Median first<br>GP visit to<br>First LCS = 4<br>weeks (IQR 1<br>– 9 weeks) | 3.3 (d)                                                   | Yes: 25% > 9 weeks<br>between GP to LCS<br><br>Standard Medical<br>Advisory<br>Committee/Working<br>Group for GP to Rx<br>(total interval) = max<br>6-8 weeks                                             |                                                                                                                                                                                        |                                                                                                         |
| 77. | Dransfield et al.,<br>2006(98) | Retrospective<br>review<br>Birmingham<br>Veterans<br>Affairs Medical<br>Center<br>(BVAMC),<br>Alabama,<br>USA1999 -<br>2003 | Electronic<br>medical<br>records                                                                                                                      | To explore if the<br>resection rate at the<br>Birmingham VA<br>Medical Center<br>would be<br>comparable with<br>US benchmarks<br>since the<br>introduction of a<br>specialized Lung<br>Mass Clinic. We<br>also sought to<br>identify the medical<br>and nonmedical<br>factors that<br>influenced the use<br>of surgery.                                                                                            | Other:<br>LCS to Dx<br><br>LCS to Rx                                                                                                   | N 156 total<br><br>N Resected 31<br>Mean age 64.8,<br>97% male<br><br>N non resected<br>125<br>Mean age 66.8,<br>74% male<br>87% NSCLC<br>10% St IIIA |                                                                                          |                    |                                     |              |                 |                                                      |                                               | Median LCS<br>to Dx for<br>resected=70<br><br>For non-<br>resected = 8<br><br>Median LCS<br>to Rx in<br>resected =<br>104 days                                                               | 4.7<br>5.6<br>4.8<br>1.15                                 | Yes: Median<br>exceeded Total<br>Interval is<br>recommended to be<br>4- to 8-week period<br>recommended by the<br>American College of<br>Chest Physicians<br>(44) and the British<br>Thoracic Society (2) | Yes: a<br>specialized<br>Lung Mass<br>Clinic was<br>established to<br>provide rapid<br>evaluation and<br>triage of<br>possible lung<br>cancer cases.                                   |                                                                                                         |
| 78. | Faris et al.,<br>2015(99)      | Retrospective<br>review<br><br>USA 2009 -<br>2013                                                                           | Hospital and<br>clinical records                                                                                                                      | To examine<br>baseline<br>preoperative<br>evaluation of<br>suspected lung<br>cancer patients to<br>inform a quality<br>improvement<br>project                                                                                                                                                                                                                                                                      | System interval<br><br>Treatment<br>interval                                                                                           | N 614<br>Mean age 66<br>yrs<br>52% male<br>7% Stage IV<br>56% Stage I                                                                                 |                                                                                          |                    | Median 84<br>days (IQR<br>43 – 189) |              |                 |                                                      | Median 40 days<br>(IQR 26 – 69)               |                                                                                                                                                                                              | 5.10<br>3.3 (a)<br>4.4<br>4.1                             | No                                                                                                                                                                                                        | No                                                                                                                                                                                     |                                                                                                         |
| 79. | Brocken et al.,<br>2012(100)   | Retrospective<br>study in a<br>university<br>hospital<br><br>The<br>Netherlands<br>1999 - 2009                              | Medical<br>records                                                                                                                                    | To compare various<br>delays in a rapid<br>outpatient<br>diagnostic program<br>(RODP) (including<br>PET-CT) for<br>suspected lung<br>cancer patients with<br>those described in<br>literature and with<br>guideline<br>recommendations,<br>to investigate the<br>effects of referral<br>route and<br>symptoms on<br>delays, and to<br>establish whether<br>delays were related<br>to disease stage<br>and outcome. | GP LCS<br>interval<br><br>Primary Care<br>delay<br><br>Secondary<br>Care Delay<br><br>Treatment<br>interval<br><br>Other:<br>LCS to Dx | N 280<br>Mean age 66<br>yrs<br>67% male<br>90% NSCLC<br>9% SCLC                                                                                       | Median 7<br>(IQR 5-9)                                                                    |                    |                                     | 18 (6 – 46)  | 36 (26 –<br>46) |                                                      | 19 (6.5 – 27)                                 |                                                                                                                                                                                              | LCS to Dx: 2<br>(1 – 17.5)                                | 1.13<br>5.6<br>3.3 (a)<br>3.3 (e)<br>4.6<br>4.7<br>4.5                                                                                                                                                    | Median GPLCS<br>interval within BTS(2),<br>RAND(26), ACCP(44)<br>but falls short of<br>Dutch guidelines<br>(101): 80% less than<br>diagnostic +treatment<br>interval target 35<br>days | Yes: rapid<br>outpatient<br>diagnostic<br>program<br>(RODP) for<br>suspected<br>lung cancer<br>patients |
| 80. | Johnston et al.,<br>2004(102)  | Registry chart<br>review<br><br>Nova Scotia,<br>Canada<br>1992 - 2000                                                       | Oncology<br>Patient<br>Information<br>System<br>(OPIS), 1996<br>electronic<br>national<br>census data<br>file and a<br>postal code<br>conversion file | To study the wait<br>times for cancer<br>patients undergoing<br>radiotherapy                                                                                                                                                                                                                                                                                                                                       | Treatment<br>interval<br><br>Other:<br>LCS to Rx                                                                                       | N 2725<br>62% male<br>36% St IV                                                                                                                       |                                                                                          |                    |                                     |              |                 |                                                      | Median 42 days / 6<br>weeks (IQR 28 –<br>77d) |                                                                                                                                                                                              | Median LCS<br>to Rx 14 days<br>/ 6 weeks<br>(IQR 7 – 28d) | 1.18 (b)<br>1.13<br>3.12<br>3.3 (c)<br>3.3 (d)                                                                                                                                                            | CARO (103)                                                                                                                                                                             |                                                                                                         |
| 81. | Jones et al.,<br>1992(104)     | Retrospective<br>chart review                                                                                               | Medical<br>records                                                                                                                                    | To identify a large<br>number of people<br>who had a history                                                                                                                                                                                                                                                                                                                                                       | Primary Care<br>interval                                                                                                               | N 59                                                                                                                                                  | Median 7<br>days (range 0<br>– 80)                                                       |                    |                                     | 31 (0 – 713) | 37 (2 –<br>707) |                                                      |                                               | 70 (12 –<br>835)                                                                                                                                                                             | Other: LCS to<br>Rx<br>13 (2 – 704)                       | 2.3                                                                                                                                                                                                       |                                                                                                                                                                                        |                                                                                                         |

| #   | BIBLIOMETRIC<br>S             | STUDY<br>DESIGN<br><br>Region, Year                                                                                                   | DATA<br>SOURCE                                | AIMS                                                                                                                                                                                                                                                                      | OUTCOME<br>MEASURES<br>OF INTEREST<br>/ DEFINITIONS                                                                      | RESULTS:<br>Patient<br>Demographics                                                         | Time intervals in lung cancer pathway by Olesen's definitions <sup>1</sup> or equivalent |                    |                    |                                |                              |                                    |                    |                                                                                      | SUGGESTED<br>FACTORS<br>RESPONSIBL<br>E FOR DELAY            | Guidelines applied on<br>target times?                                                                                                                                     | Involvement of<br>Fast Track<br>System?       |                                              |
|-----|-------------------------------|---------------------------------------------------------------------------------------------------------------------------------------|-----------------------------------------------|---------------------------------------------------------------------------------------------------------------------------------------------------------------------------------------------------------------------------------------------------------------------------|--------------------------------------------------------------------------------------------------------------------------|---------------------------------------------------------------------------------------------|------------------------------------------------------------------------------------------|--------------------|--------------------|--------------------------------|------------------------------|------------------------------------|--------------------|--------------------------------------------------------------------------------------|--------------------------------------------------------------|----------------------------------------------------------------------------------------------------------------------------------------------------------------------------|-----------------------------------------------|----------------------------------------------|
|     |                               |                                                                                                                                       |                                               |                                                                                                                                                                                                                                                                           |                                                                                                                          |                                                                                             | GP-LCS<br>interval                                                                       | Doctor<br>Interval | System<br>Interval | PCI                            | SCI                          | Diagnosti<br>c Interval            | Treatment Interval | Total<br>interval                                                                    |                                                              |                                                                                                                                                                            |                                               | Other<br>relevant<br>intervals /<br>findings |
|     |                               | 4 districts in<br>Devon, UK<br>1986 - 1990                                                                                            |                                               | of one of six<br>common types of<br>cancer and to<br>determine the times<br>taken from a<br>patient's first<br>presentation at the<br>general practitioner<br>with a symptom or<br>sign of the disease<br>to the start of<br>treatment at the<br>hospital                 | GP LCS<br>interval<br><br>Secondary<br>Care interval<br><br>Total interval<br><br>Other: LCS to<br>Rx                    |                                                                                             |                                                                                          |                    |                    |                                |                              |                                    |                    |                                                                                      |                                                              |                                                                                                                                                                            |                                               |                                              |
| 82. | Kesson et al.,<br>1998(105)   | Retrospective<br>review<br><br>Glasgow, UK<br>1991 - 1992                                                                             | Case notes and cancer<br>registry             | To determine local<br>practice and identify<br>resources utilized<br>by this significant<br>group of patients.                                                                                                                                                            | Other:<br>LCS to Rx                                                                                                      | N 262<br>66% male<br>79% NSCLC                                                              |                                                                                          |                    |                    |                                |                              |                                    |                    |                                                                                      | Median LCS<br>to Rx 63 days                                  | 3.7<br>3.3 (c)<br>4.8<br>4.1<br>3.3 (a)<br>5.5                                                                                                                             |                                               |                                              |
| 83. | Knorst et al.,<br>2003(106)   | Prospective<br>study<br>Sao Paulo,<br>Brazil<br><br>1990 – 1998                                                                       | Medical<br>records                            | To evaluate the<br>time required for<br>diagnosis and<br>surgical treatment<br>of lung cancer in a<br>general university<br>hospital                                                                                                                                      | Treatment<br>interval<br><br>Diagnostic<br>interval<br><br>Other:<br><br>LCS to Dx                                       | N 69<br>NSCLC 96%<br>77% male<br>Mean age 62<br>yrs                                         |                                                                                          |                    |                    |                                | Median<br>18 (IQR 7<br>– 57) | Median 20 days<br>(IQR 0 -36)      |                    | Median LCS<br>to Dx 18 days                                                          | 3.12<br>3.3 (a)                                              | Whitehouse (56)45%<br>< 15 days target LCS<br>to Dx<br><br>30% < target<br>treatment interval of<br>30 days                                                                |                                               |                                              |
| 84. | Laroche et al.,<br>1998(107)  | Prospective<br>review<br><br>District<br>hospitals<br>1995, UK                                                                        | Medical<br>records                            | Time from<br>presentation to<br>definitive treatment<br>and surgical<br>resection rates in<br>first year of<br>implementation of a<br>new "two-stop"<br>multidisciplinary<br>service                                                                                      | Other:<br>LCS to Rx                                                                                                      | N 209<br>patients<br>Mean 69 years<br>62% male<br>10% SCLC<br>66% NSCLC<br>2% Stage IV      |                                                                                          |                    |                    |                                |                              |                                    |                    | Median 35<br>days (range 7<br>– 81 days)                                             | 5.6                                                          | a "two stop"<br>investigation<br>and<br>management<br>service<br>recently<br>established at<br>Papworth<br>Hospital, the<br>regional<br>centre.                            |                                               |                                              |
| 85. | Lee et al.,<br>2002(108)      | Retrospective<br>audit<br><br>Department of<br>Thoracic<br>Surgery at the<br>Royal<br>Brompton<br>Hospital (RBH)<br>UK<br>1997 - 1998 | Medical<br>records                            | To assess the<br>delays in their care<br>against BTS<br>guidelines                                                                                                                                                                                                        | Other<br>LCS to Rx                                                                                                       | N 90<br>Median age 65<br>57% male                                                           |                                                                                          |                    |                    |                                |                              |                                    |                    |                                                                                      | Median LCS<br>to Rx 80 days                                  | 3.3 (a)<br>5.6<br>5.3<br>3.2<br>1.0<br>1.15<br>1.11<br>5.7 (a)<br>2.7<br>4.5<br>3.4<br>2.3<br>2.2<br>5.9<br>5.6<br>3.7<br>2.5                                              | BTS (2) – only 29% <<br>56 days for LCS to Rx | No                                           |
| 86. | Liberman et al.,<br>2006(109) | Observational<br>retrospective<br>study<br>Montreal,<br>Canada<br>1993 - 2003                                                         | Clinical charts                               | To evaluate the<br>length of various<br>waiting times for<br>surgery as well as<br>their association<br>with surgical stage<br>in patients with                                                                                                                           | LCS to Rx<br><br>Total interval<br><br>Treatment<br>interval<br><br>Secondary<br>interval                                | N 256<br>Stage I 56%<br>Stage IV 9.4%<br>60% men<br>Mean age 65<br>years                    |                                                                                          |                    |                    | Median<br>38 days              |                              | Median 80 days                     | Median 109<br>days | LCS to Rx =<br>median 82<br>days                                                     | 3.3 (a)<br>4.1<br>3.7<br>3.4                                 | BTS (2)                                                                                                                                                                    |                                               |                                              |
| 87. | Loh et al.,<br>2006(110)      | Retrospective<br>chart study<br><br>1996 – 2004,<br>Malaysia                                                                          | Clinical charts<br><br>Two urban<br>hospitals | To investigate<br>patient and doctor-<br>related delays in<br>Malaysia                                                                                                                                                                                                    | LCS to Rx                                                                                                                | N 122<br>78% male<br>98% NSCLC                                                              |                                                                                          |                    |                    |                                |                              |                                    |                    |                                                                                      | Median LCS<br>to Rx = 34<br>days (IQR<br>18.6 to 74<br>days) | 5.1<br>3.2<br>1.13<br>1.15                                                                                                                                                 |                                               |                                              |
| 88. | Lovgren et al.,<br>2008(111)  | Retrospective<br>study<br><br>One hospital,<br>Sweden, 2003                                                                           | Medical<br>records                            | Explore<br>relationships<br>between lung<br>cancer patients'<br>symptoms<br>triggering health<br>care system (HCS)<br>contact,<br>demographic/clinical<br>characteristics,<br>and time spans in<br>the care trajectory<br>from first<br>symptom(s) to<br>treatment start. | GPLCS interval<br><br>Primary Care<br>interval<br><br>Secondary<br>Care interval<br><br>Other:<br>LCS to Dx<br>LCS to Rx | N 314<br>49% male<br>Mean age 69<br>yrs<br>11.5% SCLC<br>88% NSCLC<br>St I 23%<br>St IV 37% | Median 16<br>days<br>(range 0 -<br>105)                                                  |                    |                    | Median 28<br>days<br>(0 – 653) | Median<br>58 days            |                                    |                    | Median LCS<br>to Dx = 9<br>days<br>(0 – 573)<br><br>Median LCS<br>to Rx = 94<br>days | 1.15<br>1.16<br>1.2 (a)<br>3.4                               | All median intervals<br>exceed Swedish<br>national<br>recommendations<br>(112): 27% patients<br>within GPLCS target<br>7 days, 25 - 56%<br>within LCS-Rx target<br>31 days |                                               |                                              |
| 89. | Porta et al.,<br>1991(113)    | Retrospective<br>follow up study<br><br>Barcelona<br>Spain<br><br>?1990                                                               | Hospital based<br>tumour<br>registry          | To assess the<br>relationship<br>between survival,<br>tumour stage, and<br>the interval from<br>first documented<br>symptom to<br>diagnosis (SDI, or<br>duration of<br>symptoms)                                                                                          | Diagnostic<br>interval                                                                                                   | N 410<br>Mean Age 64<br>yrs<br>91.5% male<br>41% St IV                                      |                                                                                          |                    |                    |                                |                              | Median<br>62 days<br>(IQR<br>3.93) |                    |                                                                                      |                                                              |                                                                                                                                                                            |                                               |                                              |

| #   | BIBLIOMETRIC<br>S                  | STUDY<br>DESIGN<br><br>Region, Year                                                                                                                                                   | DATA<br>SOURCE                                                                                                                                                                                                                                             | AIMS                                                                                                                                                                                                                                                                                 | OUTCOME<br>MEASURES<br>OF INTEREST<br>/ DEFINITIONS                                                                                                                     | RESULTS:<br>Patient<br>Demographics                                                                                                                                                              | Time intervals in lung cancer pathway by Olesen's definitions <sup>1</sup> or equivalent |                    |                                                           |     |                                                                      |                                                            |                                                                                                                                                |                                                                                                                                                                                                                                       | SUGGESTED<br>FACTORS<br>RESPONSIBL<br>E FOR DELAY                                                                  | Guidelines applied on<br>target times?                                                                                                                 | Involvement of<br>Fast Track<br>System?                                                                                                                                                                 |                                              |  |
|-----|------------------------------------|---------------------------------------------------------------------------------------------------------------------------------------------------------------------------------------|------------------------------------------------------------------------------------------------------------------------------------------------------------------------------------------------------------------------------------------------------------|--------------------------------------------------------------------------------------------------------------------------------------------------------------------------------------------------------------------------------------------------------------------------------------|-------------------------------------------------------------------------------------------------------------------------------------------------------------------------|--------------------------------------------------------------------------------------------------------------------------------------------------------------------------------------------------|------------------------------------------------------------------------------------------|--------------------|-----------------------------------------------------------|-----|----------------------------------------------------------------------|------------------------------------------------------------|------------------------------------------------------------------------------------------------------------------------------------------------|---------------------------------------------------------------------------------------------------------------------------------------------------------------------------------------------------------------------------------------|--------------------------------------------------------------------------------------------------------------------|--------------------------------------------------------------------------------------------------------------------------------------------------------|---------------------------------------------------------------------------------------------------------------------------------------------------------------------------------------------------------|----------------------------------------------|--|
|     |                                    |                                                                                                                                                                                       |                                                                                                                                                                                                                                                            |                                                                                                                                                                                                                                                                                      |                                                                                                                                                                         |                                                                                                                                                                                                  | GP-LCS<br>interval                                                                       | Doctor<br>Interval | System<br>Interval                                        | PCI | SCI                                                                  | Diagnosti<br>c Interval                                    | Treatment Interval                                                                                                                             | Total<br>interval                                                                                                                                                                                                                     |                                                                                                                    |                                                                                                                                                        |                                                                                                                                                                                                         | Other<br>relevant<br>intervals /<br>findings |  |
| 90. | Riedel et al.,<br>2006(114)        | Retrospective<br>sequential<br>single -<br>institution<br>(Veterans<br>Affairs) cohort<br>study<br><br>MTOC: 1999 –<br>2002<br><br>Non-MTOC:<br>2002 - 2003<br><br>USA<br>1999 - 2003 |                                                                                                                                                                                                                                                            | To evaluate the<br>impact of a<br>multidisciplinary<br>clinic on sequential<br>cohorts of lung<br>cancer patients<br>evaluated during<br>the operation of a<br>multidisciplinary<br>thoracic oncology<br>clinic (MTOC) and a<br>subsequent period<br>when the MTOC did<br>not exist. | Diagnostic<br>interval<br><br>Treatment<br>interval<br><br>Other:<br>GP visit to first<br>LCS<br><br>LCS to Dx<br><br>LCS to Rx<br>(surgery)                            | MTOC sample:<br>N 244<br>Median age 68<br>81% NSCLC<br>10% SCLC<br>StIV 28%<br>St VII 42%<br><br>Non-MTOC<br>sample<br>N 101<br>Median age 65<br>81% NSCLC<br>13% SCLC<br>StIV 28%<br>St VII 36% |                                                                                          |                    |                                                           |     | MTOC:<br>Median<br>45 days<br><br>Non-<br>MTOC:<br>Median<br>47 days | MTOC:<br>Median 21 days<br><br>Non-MTOC:<br>Median 23 days |                                                                                                                                                | GP visit to<br>LCS visit:<br>MTOC:<br>Med 25 d<br><br>Non-MTOC:<br>Med 22 d<br><br>LCS to Dx:<br>MTOC:<br>Med 12 d<br>Non-MTOC:<br>Med 14 d<br><br>LCS to Rx<br>(surgery) LCS<br>to Dx:<br>MTOC:<br>Med 50 d<br>Non-MTOC:<br>Med 40 d |                                                                                                                    | BTS (2)                                                                                                                                                |                                                                                                                                                                                                         |                                              |  |
| 91. | Saint-Jacques et<br>al., 2008(115) | Retrospective<br>review<br><br>Nova Scotia,<br>Canada<br>2005                                                                                                                         | Medical<br>records                                                                                                                                                                                                                                         | To examine wait<br>times from<br>suspicious imaging<br>study (Detection) to<br>surgery and then<br>adjuvant<br>chemotherapy for<br>patients with early-<br>stage non-small cell<br>lung cancer<br>(NSCLC) who<br>undergo surgical<br>resection.                                      | System interval<br>(from first<br>suspicious scan<br>to first<br>treatment – for<br>this scoping<br>review: first<br>treatment =<br>surgery)<br><br>Other: LCS to<br>Rx | N 107<br>56% male<br>75% NSCLC                                                                                                                                                                   |                                                                                          |                    | Median<br>107 days<br>(IQR – 73<br>– 141)                 |     |                                                                      |                                                            |                                                                                                                                                |                                                                                                                                                                                                                                       | Median LCS<br>to Rx 52 days<br>(IQR 32 – 78)                                                                       | Factors<br>associate with<br>delay to<br>surgery (not<br>adjuvant<br>chemo):<br><br>1.8<br>3.3 (a)<br>3.7<br>1.10<br>3.5<br>3.2<br><br>1.5 (b) and (c) |                                                                                                                                                                                                         |                                              |  |
| 92. | Schultz et al.,<br>2009(116)       | Retrospective<br>cross-sectional<br>study<br><br>2002 – 2006<br><br>USA                                                                                                               | Merged data<br>from three<br>sources: (i) a<br>retrospective<br>chart review<br>conducted at<br>132VA<br>medical<br>centers (ii) an<br>independent<br>audit of VA<br>oncology<br>programs, and<br>(iii) information<br>collected from<br>the VA<br>website | To evaluate<br>timeliness of lung<br>cancer care and<br>identify institutional<br>characteristics<br>associated with<br>timely care within<br>the Veterans Affairs<br>(VA) health care<br>system.                                                                                    | System interval<br><br>Treatment<br>interval<br><br>Other:<br>First suspicious<br>scan to<br>diagnosis                                                                  | N 2033                                                                                                                                                                                           |                                                                                          |                    | Median 63<br>days (IQR<br>33 – 111,<br>range 23 –<br>182) |     |                                                                      |                                                            | Median 22 days<br>(IQR 6 – 45) for all<br>patient (adherence<br>in Table 1 was for<br>VA patient, had<br>med Tm tint of 22<br>from N 1910 pts) |                                                                                                                                                                                                                                       | Median time<br>from First<br>suspicious<br>scan to<br>diagnosis =<br>33 days (IQR<br>13 – 70,<br>range 9 -<br>146) | 1.13<br>5.10<br>5.3<br>3.5 (c) and (d)<br>3.7<br>3.8<br>4.7<br>5.1                                                                                     | BTS(2), RAND(26)<br>(Table 1):<br>BTS – Scan to LCS<br>45% adherence<br><br>LCS to Rx (surgery)<br>46% adherence<br><br>RAND:<br>Scan to Dx 69%<br>adherence<br><br>Treatment interval<br>63% adherence |                                              |  |
| 93. | Finlay et al.,<br>2002 (117)       | Retrospective<br>case-control<br>study<br><br>USA 1992 -<br>1996                                                                                                                      | the New<br>England<br>Medical<br>Center cancer<br>center<br>database.                                                                                                                                                                                      | To determine if<br>Asian immigrants to<br>the United States<br>present with more<br>advanced lung<br>cancer compared to<br>non-Asians                                                                                                                                                | Treatment<br>interval                                                                                                                                                   | Asians:<br>N42<br>Age 71 yrs<br>79% male<br>SCLC 9.5%<br>NSCLC 88%<br><br>Non-Asian<br>SCLC 21%<br>NSCLC 76%<br>N 42<br>Age 71<br>79% male                                                       |                                                                                          |                    |                                                           |     |                                                                      |                                                            | Asians:<br>31 days<br><br>Non-Asians 26<br>days                                                                                                |                                                                                                                                                                                                                                       |                                                                                                                    | 1,12                                                                                                                                                   |                                                                                                                                                                                                         |                                              |  |
| 94. | Shea et al.,<br>2008(118)          | Medicare data<br>linkage study<br><br>USA<br><br>2003 - 2006                                                                                                                          | 5%<br>representative<br>Medicare<br>claims                                                                                                                                                                                                                 | To compare patient<br>wait times and<br>travel distances for<br>chemotherapy for<br>common cancers<br>(incl lung) before<br>and after the<br>enactment of the<br>Medicare<br>Prescription Drug,<br>Improvement, and<br>Modernization Act<br>of 2003(MMA)                             | Treatment<br>interval                                                                                                                                                   | 2003 sample:<br><br>N 1930<br><br>Latest / 2006<br>sample:<br>N 1931                                                                                                                             |                                                                                          |                    |                                                           |     |                                                                      |                                                            | 2003 sample:<br>Median 21 days<br>(IQR 9 -41)<br><br>2006 sample:<br>Median 24 days<br>(IQR 11 -47)                                            |                                                                                                                                                                                                                                       |                                                                                                                    | 3.12<br>1.18 (a)<br>1.4 (a)                                                                                                                            |                                                                                                                                                                                                         |                                              |  |
| 95. | Shin et al.,<br>2013(119)          | Cohort study<br><br>Korea<br>2006 – 2011                                                                                                                                              | Korean<br>Central<br>Cancer<br>Registry<br>(KCCR).                                                                                                                                                                                                         |                                                                                                                                                                                                                                                                                      | Treatment<br>interval                                                                                                                                                   | N 398<br>Mean age<br>63.5yrs<br>St VII 48%<br>80% male                                                                                                                                           |                                                                                          |                    |                                                           |     |                                                                      |                                                            | Median 20 (range 1<br>– 302)                                                                                                                   |                                                                                                                                                                                                                                       |                                                                                                                    | 1.15<br>1.18<br>3.5 (a)<br>1.5 (a)                                                                                                                     | Bladder cancer<br>guidelines: maximum<br>wait time of 2–4<br>weeks to surgery;<br>29% < 4 weeks                                                                                                         |                                              |  |
| 96. | Simunovic et al.,<br>2001(120)     | Ontario,<br>Canada<br>1993-2000                                                                                                                                                       | Databases of<br>the Canadian<br>Institute for<br>Health<br>Information<br>(CIHI) and the<br>Ontario Health                                                                                                                                                 | To determine how<br>long patients in<br>Ontario waited for<br>major breast,<br>colorectal, lung or<br>prostate cancer<br>surgery                                                                                                                                                     | Other:<br>LCS to Rx<br>(surgery)                                                                                                                                        | N 965                                                                                                                                                                                            |                                                                                          |                    |                                                           |     |                                                                      |                                                            |                                                                                                                                                |                                                                                                                                                                                                                                       | In 2000:<br>Median 34<br>days                                                                                      | 1.2 (a)<br>1.10                                                                                                                                        | BTS(2)                                                                                                                                                                                                  |                                              |  |

| #    | BIBLIOMETRIC<br>S                 | STUDY<br>DESIGN<br>Region, Year                                                                                                                                             | DATA<br>SOURCE                                                                                                                                                  | AIMS                                                                                                                                                                                                                                                | OUTCOME<br>MEASURES<br>OF INTEREST<br>/ DEFINITIONS                  | RESULTS:<br>Patient<br>Demographics                                                                         | Time intervals in lung cancer pathway by Olesen's definitions <sup>1</sup> or equivalent |                    |                                         |     |                                                                                          |                                                                                           |                    |                                                | SUGGESTED<br>FACTORS<br>RESPONSIBL<br>E FOR DELAY.                                   | Guidelines applied on<br>target times? | Involvement of<br>Fast Track<br>System? |
|------|-----------------------------------|-----------------------------------------------------------------------------------------------------------------------------------------------------------------------------|-----------------------------------------------------------------------------------------------------------------------------------------------------------------|-----------------------------------------------------------------------------------------------------------------------------------------------------------------------------------------------------------------------------------------------------|----------------------------------------------------------------------|-------------------------------------------------------------------------------------------------------------|------------------------------------------------------------------------------------------|--------------------|-----------------------------------------|-----|------------------------------------------------------------------------------------------|-------------------------------------------------------------------------------------------|--------------------|------------------------------------------------|--------------------------------------------------------------------------------------|----------------------------------------|-----------------------------------------|
|      |                                   |                                                                                                                                                                             |                                                                                                                                                                 |                                                                                                                                                                                                                                                     |                                                                      |                                                                                                             | GP-LCS<br>interval                                                                       | Doctor<br>Interval | System<br>Interval                      | PCI | SCI                                                                                      | Diagnosti<br>c Interval                                                                   | Treatment Interval | Total<br>interval                              | Other<br>relevant<br>intervals /<br>findings                                         |                                        |                                         |
|      |                                   |                                                                                                                                                                             | Insurance<br>Plan (OHP)                                                                                                                                         |                                                                                                                                                                                                                                                     |                                                                      |                                                                                                             |                                                                                          |                    |                                         |     |                                                                                          |                                                                                           |                    |                                                |                                                                                      |                                        |                                         |
| 97.  | Singh et al.,<br>2010(121)        | Retrospective<br>cohort design<br>Houston, USA<br>2004 - 2007                                                                                                               | Integrated<br>electronic<br>medical health<br>record                                                                                                            | To identify<br>characteristics and<br>predictors of<br>missed<br>opportunities<br>(failure to recognize<br>a predefined clinical<br>clue or failure to<br>complete care<br>procedure within 30<br>days) for earlier<br>diagnosis of lung<br>cancer. | Diagnostic<br>interval                                               | Missed<br>opportunity<br>(MO):<br>N 222<br>Age 68<br>99% male<br><br>Nil MO:<br>N 365<br>Age 68<br>98% male |                                                                                          |                    |                                         |     |                                                                                          | MO:<br>Median<br>132 days<br>(range 15<br>– 2445)<br><br>Non-MO:<br>(19, range<br>0 -870) |                    |                                                | 1.0<br>3.11 (a)<br>3.4<br>4.11<br>4.5<br>2.5<br>2.4<br>3.8<br>5.3                    |                                        |                                         |
| 98.  | Spurgeon et al.,<br>2000 (122)    | Retrospective<br>tracking study<br>1997 – 1998<br>UK                                                                                                                        | Hospital data                                                                                                                                                   | To investigate the<br>delays that British<br>cancer patients<br>face, we undertook<br>a retrospective<br>survey of patients<br>with newly<br>diagnosed cancer                                                                                       | GPLCS<br><br>Secondary<br>Care                                       | Unknown<br>sample<br>numbers for<br>urgent vs non-<br>urgent<br><br>Total 767                               | Urgent:Media<br>n 7 days (IQR<br>3 – 13)<br><br>Non-urgent:<br>med 12 (7 –<br>22)        |                    |                                         |     | Urgent<br>Median<br>39 days<br>(IQR 21<br>– 61)<br><br>Non-<br>urgent<br>47 (28 –<br>77) |                                                                                           |                    |                                                | 5.6                                                                                  | NHS (6)                                | Yes: Two<br>week wait<br>system         |
| 99.  | Thapa et al.,<br>2014(123)        | Prospective<br>cross sectional<br>observational<br>study<br><br>Manmohan<br>CardioThoraci<br>c Vascular and<br>Transplant<br>Center<br>(MCVTC),<br>Nepal<br><br>2011 - 2012 |                                                                                                                                                                 | Identify the steps<br>through which the<br>patients passed<br>before specialist<br>care and also<br>determine the time<br>lost in each step.                                                                                                        | Primary Care<br>interval<br><br>Other:<br>GP visit to LCS            | N 100<br>Mean age 63<br>yrs<br>64% male<br>93% NSCLC<br>1% St I<br>20% St IV<br>7% SCLC                     |                                                                                          |                    | 50 days<br>(range 1 –<br>372)           |     |                                                                                          |                                                                                           |                    | GP visit to<br>LCS 7 days<br>(range 1 –<br>20) | 1.18<br>2.4<br>2.3<br>3.2<br>4.5                                                     |                                        |                                         |
| 100. | Van de Vosse et<br>al., 2015(124) | Retrospective<br>chart review<br>study<br><br>BC, Canada<br><br>2010 - 2011                                                                                                 | Chart review<br>of available<br>electronic<br>medical<br>records<br>accessed via<br>Cancer<br>Agency<br>Information<br>System (CAIS)<br>software<br>(BCCA-EMR). | Examine the time<br>interval lung cancer<br>patients from the<br>interior of British<br>Columbia (BC)<br>experience while<br>undergoing<br>diagnostic<br>evaluation, biopsy,<br>staging, and<br>preparation for<br>treatment.                       | System Interval<br><br>GPLCS<br><br>Other:<br>LCS to Dx<br>LCS to Rx | N 231<br>77% NSCLC<br>29% Stage IV                                                                          | Median 10<br>(IQR 5 – 18)                                                                |                    | Median<br>65.5 (IQR<br>41.5 –<br>104.3) |     |                                                                                          |                                                                                           |                    | Median LCS<br>to Rx = 8 (1 –<br>15)            | 3.2<br>1.18 (b)<br>3.5<br>3.3 (a)<br>3.3 (c)<br>3.11 (a)<br>4.1<br>4.8<br>5.6<br>5.5 |                                        |                                         |



| #    | BIBLIOMETRIC<br>S             | STUDY<br>DESIGN<br><br>Region, Year                                                                                                                                                                           | DATA<br>SOURCE                                                                                                                       | AIMS                                                                                                                                                                                            | OUTCOME<br>MEASURES<br>OF INTEREST<br>/ DEFINITIONS                                                                | RESULTS:<br>Patient<br>Demographics                                                                                                                                                                                        | Time intervals in lung cancer pathway by Olesen's definitions <sup>1</sup> or equivalent |                    |                    |     |     |                         |                                   |                                                                                                                                                                                                                                                                                                  | SUGGESTED<br>FACTORS<br>RESPONSIBL<br>E FOR DELAY                                                     | Guidelines applied on<br>target times?                                                     | Involvement of<br>Fast Track<br>System?                                                                                                                                                                                                                         |                                              |
|------|-------------------------------|---------------------------------------------------------------------------------------------------------------------------------------------------------------------------------------------------------------|--------------------------------------------------------------------------------------------------------------------------------------|-------------------------------------------------------------------------------------------------------------------------------------------------------------------------------------------------|--------------------------------------------------------------------------------------------------------------------|----------------------------------------------------------------------------------------------------------------------------------------------------------------------------------------------------------------------------|------------------------------------------------------------------------------------------|--------------------|--------------------|-----|-----|-------------------------|-----------------------------------|--------------------------------------------------------------------------------------------------------------------------------------------------------------------------------------------------------------------------------------------------------------------------------------------------|-------------------------------------------------------------------------------------------------------|--------------------------------------------------------------------------------------------|-----------------------------------------------------------------------------------------------------------------------------------------------------------------------------------------------------------------------------------------------------------------|----------------------------------------------|
|      |                               |                                                                                                                                                                                                               |                                                                                                                                      |                                                                                                                                                                                                 |                                                                                                                    |                                                                                                                                                                                                                            | GP-LCS<br>interval                                                                       | Doctor<br>Interval | System<br>Interval | PCI | SCI | Diagnosti<br>c Interval | Treatment Interval                | Total<br>interval                                                                                                                                                                                                                                                                                |                                                                                                       |                                                                                            |                                                                                                                                                                                                                                                                 | Other<br>relevant<br>intervals /<br>findings |
| 101. | Rose et al.,<br>2015(125)     | Survey study<br>by<br>International<br>Cancer<br>Benchmarking<br>Partnership—a<br>collaboration<br>across six<br>countries<br>(Australia,<br>Canada,<br>Denmark,<br>Norway,<br>Sweden, UK)<br><br>2012 - 2013 | Online survey<br>of GPs<br>management<br>of scenarios<br>relating to the<br>diagnosis of<br>lung,<br>colorectal or<br>ovarian cancer | To GP behaviour<br>and systems<br>affecting timeliness<br>of investigating for<br>cancer and<br>international<br>survival differences.                                                          | GP-LCS<br>interval<br><br>Interval from<br>GP request of<br>CT/X-ray to<br>result                                  | N/A<br><br>N of PCP<br>responses =<br>2795<br><br>Relevant<br>responses from<br>GPs based in<br>Canada (BC,<br>Manitoba,<br>Ontario) Europe<br>(Denmark,<br>Norway,<br>Sweden) and<br>UK (England,<br>N.Ireland,<br>Wales) | Range = 4.9<br>– 19.2 days<br>(mean = 7.5)                                               |                    |                    |     |     |                         |                                   | Time from GP<br>request of<br>CT/X-ray to<br>result was > 4<br>weeks in<br>most<br>jurisdictions<br>and > 12<br>weeks in<br>some                                                                                                                                                                 | 2.4<br>5.3<br>4.5<br>2.9<br>4.4                                                                       | Nil specified                                                                              |                                                                                                                                                                                                                                                                 |                                              |
| 102. | Wai et al.,<br>2012(126)      | Case control<br>study<br><br>British<br>Colombia,<br>1990 - 2000                                                                                                                                              | Medical<br>records                                                                                                                   | To investigate if<br>delays in care may<br>decrease the<br>curability of patients<br>with stage III<br>NSCLC.                                                                                   | Other:<br>Scan to Dx<br>Dx to LCS<br>referral<br>Dx to LCS visit<br>LCS to Rx                                      | 2 unpaired<br>samples:<br>Radically<br>treated (case)<br>N 119<br>49% male<br><br><br>Palliatively<br>treated<br>(control):<br>N 238<br>53% male<br><br>100% Stage III                                                     |                                                                                          |                    |                    |     |     |                         |                                   | Median times<br>for CASES:<br>Scan to Dx =<br>27.5d<br>Dx to LCS<br>referral = 26d<br>Dx to LCS<br>visit = 31d<br>LCS to Rx =<br>29d (IQR 18<br>– 56)<br><br>CONTROLS:<br>Scan to Dx =<br>21d<br>Dx to LCS<br>referral = 28d<br>Dx to LCS<br>visit = 31.5d<br>LCS to Rx =<br>11d (IQR 4 –<br>26) | 3.3 (c)<br>3.3 (d)<br>2.7<br>1.15<br>2.2<br>1.11<br>4.5<br>3.13<br>4.8                                |                                                                                            |                                                                                                                                                                                                                                                                 |                                              |
| 103. | Yurdakul et al.,<br>2015(127) | Prospective<br>study<br><br>Turkey 2010 -<br>2011                                                                                                                                                             | Patient<br>interviews and<br>clinical records                                                                                        | To investigate<br>patient and doctor<br>delays in NSCLC<br>and factors<br>affecting such<br>delays                                                                                              | Total interval<br><br>Treatment<br>interval<br><br>Other:<br>GP visit to LCS<br>visit<br><br>LCS to Dx             | N 1016<br>91% male<br>Mean age 62<br>years                                                                                                                                                                                 |                                                                                          |                    |                    |     |     |                         | Mean 24.4 days                    |                                                                                                                                                                                                                                                                                                  | Other: Mean<br>first GP visit<br>to LCS visit<br>61.6 days<br><br>LCS to Dx<br>20.4 days              | 3.7<br>1.13<br>1.1<br>1.18 (a)<br>1.19<br>4.10<br>4.8<br>4.1<br>1.24<br>4.6<br>3.12<br>3.1 | BTS(2) and Canadian<br>guidelines (36)<br>Delay in GP visit to<br>LCS visit > 2 weeks in<br>65.1%<br><br>Delay in LCS to Dx ><br>2 weeks in 37.6%<br><br>Delay in Treatment<br>interval > 2 weeks in<br>42.8%<br><br>Total Interval Delay ><br>6 weeks in 67.3% |                                              |
| 104. | Chandra et al.,<br>2009(128)  | Retrospective<br>review<br>New Delhi,<br>India 2002 -<br>2008                                                                                                                                                 | Medical<br>records                                                                                                                   | To determine the<br>average time period<br>required at various<br>steps for<br>diagnosing lung<br>cancer from the<br>onset of symptoms<br>at a tertiary referral<br>centre in Northern<br>India | Treatment<br>interval                                                                                              | N 165<br>84% male<br>Age 57.6 years<br>86.7% NSCLC<br>13.3% SCLC<br>90% St III/IV                                                                                                                                          |                                                                                          |                    |                    |     |     |                         | Median 20 days<br>(range 1 – 380) |                                                                                                                                                                                                                                                                                                  |                                                                                                       | 4.5<br>1.8<br>1.19 (b)<br>2.12<br>1.15<br>2.2<br>2.3<br>4.1<br>3.3 (b)                     | BTS, Canadian. Only<br>4% patients had<br>treatment interval < 1<br>week but unsure what<br>guideline<br>recommends this.                                                                                                                                       |                                              |
| 105. | Yilmaz et al.,<br>2008(129)   | Prospective<br>study<br>Turkey<br>2005 - 2006                                                                                                                                                                 | Patient<br>interviews and<br>medical<br>records                                                                                      | To investigate the<br>delays from the first<br>symptom to<br>thoracotomy and to<br>examine whether<br>the delays cause<br>the stage<br>advancement in<br>lung cancer                            | Treatment<br>interval<br><br>Total interval<br><br>Other:<br>First GP visit to<br>first LCS visit<br><br>LCS to Dx | N 138<br>96% male<br>Mean age 58<br>yrs<br>2.1% St IV<br>100% NSCLC                                                                                                                                                        |                                                                                          |                    |                    |     |     |                         | Median 19 days                    | Median 56<br>days                                                                                                                                                                                                                                                                                | Median LCS<br>to Dx = 11<br>days<br><br>Median First<br>GP visit to<br>first LCS visit<br>= 20.5 days | 2.7<br>3.3 (a)<br>4.1<br>3.7                                                               | BTS, Canadian<br>All < 14 weeks<br>according to study<br>investigators<br><br>40% had GP-LCS <<br>14 d but no median<br>interval given<br><br>64% had LCS-Dx <<br>14 d<br><br>30% had Treatment<br>int <14d<br><br>26% Total interval < 6<br>weeks              |                                              |
| 106. | Perez et al.,<br>2008(130)    | Cross<br>sectional study                                                                                                                                                                                      | Medical<br>records                                                                                                                   | To analyse factors<br>impacting length of                                                                                                                                                       | Treatment<br>interval                                                                                              | N 198<br>84% male                                                                                                                                                                                                          |                                                                                          |                    |                    |     |     |                         | Median 39 days<br>(IQR 17 – 68)   |                                                                                                                                                                                                                                                                                                  |                                                                                                       | 1.13<br>3.5                                                                                | 42% < 30 days                                                                                                                                                                                                                                                   |                                              |

| # | BIBLIOMETRICS | STUDY DESIGN<br>Region, Year   | DATA SOURCE | AIMS                                                            | OUTCOME MEASURES OF INTEREST / DEFINITIONS | RESULTS: Patient Demographics | Time intervals in lung cancer pathway by Olesen's definitions <sup>1</sup> or equivalent |                 |                 |     |     |                     |                    |                | SUGGESTED FACTORS RESPONSIBLE FOR DELAY. | Guidelines applied on target times? | Involvement of Fast Track System? |
|---|---------------|--------------------------------|-------------|-----------------------------------------------------------------|--------------------------------------------|-------------------------------|------------------------------------------------------------------------------------------|-----------------|-----------------|-----|-----|---------------------|--------------------|----------------|------------------------------------------|-------------------------------------|-----------------------------------|
|   |               |                                |             |                                                                 |                                            |                               | GP-LCS interval                                                                          | Doctor Interval | System Interval | PCI | SCI | Diagnostic Interval | Treatment Interval | Total interval | Other relevant intervals / findings      |                                     |                                   |
|   |               | Catalonia Spain<br>2001 - 2002 |             | treatment interval in six commonest cancers in Catalonia, Spain |                                            | 50% St IV                     |                                                                                          |                 |                 |     |     |                     |                    |                | 3.7<br>3.12                              |                                     |                                   |

| #    | BIBLIOMETRIC<br>S               | STUDY<br>DESIGN<br><br>Region, Year                                                                 | DATA<br>SOURCE                                                                                                                                                              | AIMS                                                                                                                                                                                                                                                                                                                                                            | OUTCOME<br>MEASURES<br>OF INTEREST<br>/ DEFINITIONS          | RESULTS:<br>Patient<br>Demographics                                                                                                                                                                                                                | Time intervals in lung cancer pathway by Olesen's definitions <sup>1</sup> or equivalent |                    |                        |     |     |                         |                                      |                                                                                                                                                     | SUGGESTED<br>FACTORS<br>RESPONSIBL<br>E FOR DELAY | Guidelines applied on<br>target times?  | Involvement of<br>Fast Track<br>System?                                                                                          |                                              |  |
|------|---------------------------------|-----------------------------------------------------------------------------------------------------|-----------------------------------------------------------------------------------------------------------------------------------------------------------------------------|-----------------------------------------------------------------------------------------------------------------------------------------------------------------------------------------------------------------------------------------------------------------------------------------------------------------------------------------------------------------|--------------------------------------------------------------|----------------------------------------------------------------------------------------------------------------------------------------------------------------------------------------------------------------------------------------------------|------------------------------------------------------------------------------------------|--------------------|------------------------|-----|-----|-------------------------|--------------------------------------|-----------------------------------------------------------------------------------------------------------------------------------------------------|---------------------------------------------------|-----------------------------------------|----------------------------------------------------------------------------------------------------------------------------------|----------------------------------------------|--|
|      |                                 |                                                                                                     |                                                                                                                                                                             |                                                                                                                                                                                                                                                                                                                                                                 |                                                              |                                                                                                                                                                                                                                                    | GP-LCS<br>interval                                                                       | Doctor<br>Interval | System<br>Interval     | PCI | SCI | Diagnosti<br>c Interval | Treatment Interval                   | Total<br>interval                                                                                                                                   |                                                   |                                         |                                                                                                                                  | Other<br>relevant<br>intervals /<br>findings |  |
| 107. | Burmeister et al.,<br>2010(131) | Retrospective<br>analysis<br>Queensland<br>Australia, 2000<br>- 2004                                | Queensland<br>Cancer<br>Registry,<br>clinical<br>records,<br>Clinical<br>Pharmacy<br>Oncology<br>Management<br>System,<br>radiation<br>therapy<br>database,<br>Data linkage | To determine<br>whether lung<br>cancer radiation<br>therapy waiting<br>times in<br>Queensland public<br>hospitals are<br>associated with<br>distance of<br>residence from the<br>nearest treatment<br>facility                                                                                                                                                  | Treatment<br>interval                                        | N 1535<br>Age 69 yrs<br>71% male<br>91% NSCLC<br>6% SCLC                                                                                                                                                                                           |                                                                                          |                    |                        |     |     |                         | Median 33 days                       |                                                                                                                                                     |                                                   | 1.13<br>1.17 (a)<br>3.3 (c)             | Royal Australian and<br>NewZealand College<br>of Radiologists<br>(RANZCR) guidelines<br>for therapy and NHS:<br><50% met targets |                                              |  |
| 108. | Berthelet et al.,<br>2006(132)  | Retrospective<br>review<br><br>Quebec,<br>Canada<br><br>1991 - 1999                                 | Medical<br>records at<br>Vancouver<br>Island Centre<br>of the British<br>Columbia<br>Cancer<br>Agency<br>(BCCA).                                                            | To examine time<br>intervals between<br>diagnosis and<br>treatment of limited<br>stage small cell<br>lung cancer (L-<br>SCLC) and to<br>evaluate its effect<br>on clinical<br>outcomes.                                                                                                                                                                         | Other:<br>Scan to Dx<br>Dx to LCS<br>LCS to Rx<br>(CCXRT)    | N 166<br>Med age 68<br>years<br>44% male<br>100% SCLC                                                                                                                                                                                              |                                                                                          |                    |                        |     |     |                         |                                      | Median LCS<br>to Rx<br>(CCXRT)<br>63.5 (range 2<br>– 272<br><br>Median Scan<br>to Dx = 20 (0<br>– 160)<br><br>Median Dx to<br>LCS = 12 (-9<br>– 66) | 1.13                                              |                                         |                                                                                                                                  |                                              |  |
| 109. | Leprieur et al.,<br>2012(133)   | Retrospective<br>review<br><br>2006 – 2008<br>France                                                | Medical<br>records                                                                                                                                                          | To describe delays<br>In elderly patients<br>with lung cancer                                                                                                                                                                                                                                                                                                   | Total interval                                               | N 193<br>Age 68.5 yrs<br>70% males<br>Stage IV 60%<br>SCLC 13%<br>NSCLC 87%<br><br>Gp 1: >70 yrs:<br>N 92<br>66%male<br>Median age<br>78yrs<br>13% SCLC<br>79% NSCLC<br><br>Gp2 <70 yrs<br>N 101<br>73%male<br>Age 60 yrs<br>14% SCLC<br>82% NSCLC |                                                                                          |                    |                        |     |     |                         |                                      | Gp1:<br>Median 34<br>days / 1.1<br>months<br>(IQR 18 –<br>56)<br><br>Gp<br>2:Median<br>34d/1.1mo<br>(IQR 14 –<br>62)                                |                                                   | 1.10<br>4.1<br>4.8                      |                                                                                                                                  |                                              |  |
| 110. | Bilimoria et al.,<br>2011(134)  | Retrospective<br>review<br><br>USA<br>2003 - 2005                                                   | National<br>Cancer<br>database<br>(NCDB)                                                                                                                                    | (1) to determine<br>whether treatment<br>interval has<br>increased over<br>time; (2) to examine<br>treatment intervals<br>at National Cancer<br>Institute (NCI)<br>designated cancer<br>centers, academic<br>hospitals, Veterans'<br>Affairs (VA)<br>facilities, and<br>community<br>hospitals; and (3) to<br>assess factors<br>associated with<br>longer times | Treatment<br>interval                                        | N 54,338<br>54% male<br>Stage I 62%<br>Med age 69 yrs                                                                                                                                                                                              |                                                                                          |                    |                        |     |     |                         |                                      | Median 35 days                                                                                                                                      |                                                   |                                         | 3.5<br>1.2 (a)<br>1.13<br>1.4 (a)                                                                                                | 43% treated within 30<br>days                |  |
| 111. | Booth et al.,<br>2013(135)      | Population-<br>based,<br>retrospective<br>cohort study<br><br>Ontario,<br>Canada<br><br>2004 - 2006 | Ontario<br>Cancer<br>Registry<br>(OCR)                                                                                                                                      | Describe the<br>association<br>between time to<br>adjuvant<br>chemotherapy<br>(TTAC) and survival<br>in non-small cell<br>lung cancer<br>(NSCLC).                                                                                                                                                                                                               | Treatment<br>interval                                        | N 1032<br>Mean age 62<br>50% male<br>5% St IV<br>20% St I                                                                                                                                                                                          |                                                                                          |                    |                        |     |     |                         |                                      | Median 35 days<br>(range 0 – 161)                                                                                                                   |                                                   |                                         |                                                                                                                                  |                                              |  |
| 112. | Cheung et al.,<br>2011(136)     | Populatio n<br>based cohort<br>study<br><br>1996 – 2000<br>Manitoba<br>Canada                       | Manitoba<br>cancer registry                                                                                                                                                 | To determine the<br>wait times and<br>healthcare costs<br>around the time of<br>non-small cell lung<br>cancer (NSCLC)<br>diagnosis for a<br>large, population-<br>based cohort of<br>patients.                                                                                                                                                                  | Diagnostic<br>interval<br><br>LCS to Dx                      | N 2852<br>57% male<br>Mean age 72<br>yrs<br>40% St IV                                                                                                                                                                                              |                                                                                          |                    |                        |     |     |                         | Median<br>145 d<br>(IQR 90 –<br>170) |                                                                                                                                                     |                                                   | Median LCS<br>to Dx = 6 (1 –<br>20)     | 3.12<br>4.1<br>1.13<br>1.15                                                                                                      |                                              |  |
| 113. | Collins et al.,<br>2009(137)    | Retrospective<br>review<br><br>Dublin 2006                                                          | Medical<br>records<br><br>St. James<br>hospital                                                                                                                             | To evaluate trends<br>in waiting times                                                                                                                                                                                                                                                                                                                          | GPLCS interval<br><br>LCS to Dx<br><br>Treatment<br>interval | N 331                                                                                                                                                                                                                                              | Median 5<br>(IQR 3 – 10)                                                                 |                    |                        |     |     |                         |                                      | Median 25 (IQR 5 –<br>22)                                                                                                                           |                                                   | Median LCS<br>to Dx = 5<br>(IQR 7 – 25) | 3.3 (a)<br>4.8<br>3.12                                                                                                           | NHS for GPLCS<br>(TWW), SCI and Rx<br>Int    |  |
| 114. | Faris et al.,<br>2015(99)       | Retrospective<br>review                                                                             | Medical<br>records                                                                                                                                                          | To examine<br>presurgical                                                                                                                                                                                                                                                                                                                                       | System interval                                              | N 614<br>Age 66 yrs                                                                                                                                                                                                                                |                                                                                          |                    | Median 84<br>(IQR 43 – |     |     |                         |                                      | Median 40 (IQR 26<br>– 69)                                                                                                                          |                                                   |                                         | 4.1<br>3.3 (a)                                                                                                                   |                                              |  |

| # | BIBLIOMETRIC<br>S | STUDY<br>DESIGN<br><br>Region, Year | DATA<br>SOURCE | AIMS                                                       | OUTCOME<br>MEASURES<br>OF INTEREST<br>/ DEFINITIONS | RESULTS:<br>Patient<br>Demographics | Time intervals in lung cancer pathway by Olesen's definitions <sup>1</sup> or equivalent |                    |                    |     |     |                         |                    |                   | SUGGESTED<br>FACTORS<br>RESPONSIBL<br>E FOR DELAY. | Guidelines applied on<br>target times? | Involvement of<br>Fast Track<br>System? |
|---|-------------------|-------------------------------------|----------------|------------------------------------------------------------|-----------------------------------------------------|-------------------------------------|------------------------------------------------------------------------------------------|--------------------|--------------------|-----|-----|-------------------------|--------------------|-------------------|----------------------------------------------------|----------------------------------------|-----------------------------------------|
|   |                   |                                     |                |                                                            |                                                     |                                     | GP-LCS<br>interval                                                                       | Doctor<br>Interval | System<br>Interval | PCI | SCI | Diagnosti<br>c Interval | Treatment Interval | Total<br>interval | Other<br>relevant<br>intervals /<br>findings       |                                        |                                         |
|   |                   | 2009 – 2013,<br>USA                 |                | evaluation of lung<br>cancer patients<br>receiving surgery | Treatment<br>interval                               | 52% male<br>St IV 7%<br>St I 56%    |                                                                                          |                    | 189)               |     |     |                         |                    |                   |                                                    |                                        |                                         |

| #    | BIBLIOMETRIC<br>S              | STUDY<br>DESIGN<br><br>Region, Year                                         | DATA<br>SOURCE                                                                                                   | AIMS                                                                                                                                                                                                                                                    | OUTCOME<br>MEASURES<br>OF INTEREST<br>/ DEFINITIONS                                                                                                                                  | RESULTS:<br>Patient<br>Demographics                                   | Time intervals in lung cancer pathway by Olesen's definitions <sup>1</sup> or equivalent |                    |                    |                              |                                    |                         |                                                                |                                                                                             | SUGGESTED<br>FACTORS<br>RESPONSIBL<br>E FOR DELAY                                                                                                              | Guidelines applied on<br>target times?                                                                                                 | Involvement of<br>Fast Track<br>System?                                                              |                                              |
|------|--------------------------------|-----------------------------------------------------------------------------|------------------------------------------------------------------------------------------------------------------|---------------------------------------------------------------------------------------------------------------------------------------------------------------------------------------------------------------------------------------------------------|--------------------------------------------------------------------------------------------------------------------------------------------------------------------------------------|-----------------------------------------------------------------------|------------------------------------------------------------------------------------------|--------------------|--------------------|------------------------------|------------------------------------|-------------------------|----------------------------------------------------------------|---------------------------------------------------------------------------------------------|----------------------------------------------------------------------------------------------------------------------------------------------------------------|----------------------------------------------------------------------------------------------------------------------------------------|------------------------------------------------------------------------------------------------------|----------------------------------------------|
|      |                                |                                                                             |                                                                                                                  |                                                                                                                                                                                                                                                         |                                                                                                                                                                                      |                                                                       | GP-LCS<br>interval                                                                       | Doctor<br>Interval | System<br>Interval | PCI                          | SCI                                | Diagnosti<br>c Interval | Treatment Interval                                             | Total<br>interval                                                                           |                                                                                                                                                                |                                                                                                                                        |                                                                                                      | Other<br>relevant<br>intervals /<br>findings |
| 115. | Grinfeld et al.,<br>2009 (138) | Prospective<br>study<br><br>Ottawa 2004 -<br>2005                           | Medical<br>records, Chart<br>abstraction<br>and patient-<br>completed<br>questionnaires                          | To prospectively<br>measure peri-<br>diagnostic and<br>surgical time<br>intervals for<br>patients with<br>suspected<br>colorectal, lung, or<br>prostate cancer.                                                                                         | Treatment<br>interval<br>(Interval 5)<br><br>Secondary<br>Care interval<br>(9)<br><br>GPLCS (3)                                                                                      | N 81<br>Mean age 66<br>yrs<br>59% male                                | Median 11<br>(IQR 6 – 18)                                                                |                    |                    |                              | Median<br>45 (35 –<br>64)          |                         | Median 16 (10 –<br>28)                                         |                                                                                             | 1.15<br>1.10                                                                                                                                                   |                                                                                                                                        |                                                                                                      |                                              |
| 116. | Sood et al.,<br>2009(139)      | Retrospective<br>review<br><br>South<br>Auckland, New<br>Zealand, 2004      | Hospital<br>records                                                                                              | To determine the<br>patient<br>characteristics,<br>referral patterns<br>and delays in<br>assessment and<br>treatment of<br>patients with<br>primary lung cancer<br>in South Auckland,<br>New Zealand and<br>compare with<br>international<br>standards. | GP LCS<br>interval<br><br>Other:<br>LCS to Dx<br><br>LCS to Rx<br>(surgery)                                                                                                          | N 80<br>60%<br>Male<br>69%NSCLC<br>18% SCLC<br>Median age 69<br>yrs   | Median 18<br>days (IQR<br>13.5 – 21.5)                                                   |                    |                    |                              |                                    |                         |                                                                | Median LCS<br>to Dx = 11 (4<br>– 25)<br><br>Median LCS<br>to RX (surg)<br>= 64d (no<br>IQR) | 3.12<br>1.13<br>1.15<br>4.5<br>3.2<br>4.10<br>5.6<br>3.3 (a)<br>3.3 (b)<br>3.3 (c)                                                                             | BTS: 9% met GPLCS<br><br>16% met LCS to Rx<br>(surg)                                                                                   |                                                                                                      |                                              |
| 117. | Stevens et al.,<br>2008(140)   | Retrospective<br>review<br><br>Auckland,<br>Northland<br>2004               | Medical<br>records                                                                                               | To determine<br>Secondary Care<br>transit times for<br>lung cancer<br>patients, whether<br>these times<br>conformed to<br>international<br>guidelines and the<br>major factors which<br>influenced these<br>times.                                      | Secondary<br>Care<br><br>Treatment<br>interval<br><br>GPLCS<br><br>Other: First ref<br>to SC to Dx                                                                                   | N 565                                                                 | Median 12                                                                                |                    |                    |                              | Median<br>64 (IQR<br>38 – 93)      |                         | Median 31 (IQR 15<br>- 33)                                     |                                                                                             | Median First<br>ref to SC to<br>Dx = 22 (IQR<br>11 – 42)                                                                                                       | 1.13<br>1.15<br>4.1<br>5.6<br>1.0<br>3.1<br>1.2 (a)<br>1.10<br>1.4 (a)<br>1.17 (a)<br>3.7<br>5.11<br>1.9<br>1.6<br>3.11<br>2.11<br>3.4 | BTS:<br><br>38% within GPLCS<br>36% LCS – RadRT<br>56% LCS – PatXRT<br>40% LCS – chemo<br>60% LCS-Sx |                                              |
| 118. | Li et al.,<br>2013(141)        | Retrospective<br>population<br>level study<br><br>Alberta<br>Canada<br>2005 | Alberta<br>Cancer<br>Registr                                                                                     | to assess time<br>intervals in 3<br>common cancers<br>across cancer sites<br>to identify<br>potentially<br>important variation<br>in the timeliness of<br>cancer care                                                                                   | Treatment<br>interval                                                                                                                                                                | N 785                                                                 |                                                                                          |                    |                    |                              |                                    |                         | Overall median<br>41<br><br>(Sx = 49, XRT =<br>35, Chemo = 52) |                                                                                             | 1.18<br>1.13<br>3.3 (b)<br>3.3 (c)                                                                                                                             |                                                                                                                                        |                                                                                                      |                                              |
| 119. | Algar et al.,<br>2005(142)     | Retrospective<br>archive study<br><br>UK 1999 -<br>2000                     | Secondary<br>Patient-<br>reported data<br>from the<br><i>National<br/>Survey of NHS<br/>Patients:<br/>Cancer</i> | Describe and<br>compare the<br>components of<br>diagnostic delay<br>(patient, Primary<br>Care, referral,<br>Secondary Care)<br>for six types of<br>cancer incl lung                                                                                     | GPLCS<br>interval:<br>"Q D3" from<br>Box 1; but note<br>patients who<br>had a delay of<br>more than 1<br>year not incl in<br>analysis<br>Other: LCS-<br>Dx "Secondary<br>Care" delay | N total 4011<br><br>1061 for<br>GPLCS<br><br>N for LCS to Dx<br>= 812 | Median 11 (5<br>– 56)<br><br>Mean 34.8<br>(SD 51.4)                                      |                    |                    |                              |                                    |                         |                                                                | LCS to Dx =<br>median 0<br>(IQR 0 – 7)                                                      | 2.0                                                                                                                                                            |                                                                                                                                        |                                                                                                      |                                              |
| 120. | Rubin et al.,<br>2015(143)     | Retrospective<br>study<br><br>UK 2009 -<br>2010                             | English<br>National Audit<br>of Cancer<br>Diagnosis in<br>Primary Care,                                          | To assess whether,<br>in patients with<br>symptoms<br>suggestive of<br>cancer, primary-<br>care investigations<br>are associated with<br>less prompt referral                                                                                           | Primary Care<br>interval                                                                                                                                                             | N 1494                                                                |                                                                                          |                    |                    | Median 13<br>(IQR 3 –<br>39) |                                    |                         |                                                                |                                                                                             | 2.0<br>2.9<br>2.7<br>4.1<br>5.7 (a)<br>4.4<br>4.5<br>5.3                                                                                                       |                                                                                                                                        |                                                                                                      |                                              |
| 121. | Goffrit et al.,<br>2016(144)   | Retrospective<br>study<br><br>2007 - 2012<br>Ottawa<br>Canada               | Single centre<br>medical chart<br>review                                                                         | To study referral<br>patterns of patients<br>with advanced<br>NSCLC who are<br>admitted and<br>referred to Medical<br>Oncology                                                                                                                          | Treatment<br>interval<br><br>Secondary<br>Care<br><br>Other:<br><br>LCS to Rx<br><br>Referral to SC<br>until Med Onc<br><br>Dx to Med Onc                                            | N 223<br>Median age 65<br>48% male90%<br>St IV<br>100% NSCLC          |                                                                                          |                    |                    |                              | Median<br>40<br>(range 7<br>– 272) |                         | Median 43 (range<br>7 – 263)                                   |                                                                                             | LCS to Rx<br>(chemo)<br>= 31 (0 –<br>251)<br><br>Median<br>Referral to<br>SC until Med<br>Onc = 8<br>(range 0 -55)<br><br>Dx to Med<br>Onc = 10 (-10<br>– 126) | 1.16<br>2.3<br>4.5<br>3.12<br>4.4<br>1.14<br>2.7<br>4.10                                                                               |                                                                                                      |                                              |
| 122. | Ichinoche et al.,<br>2006(145) | Retrospective<br>review<br><br>Shizuoka,<br>Japan<br><br>1999 -2004         | Clinician<br>interviews and<br>medical<br>records                                                                | To study delays in<br>treatment of<br>Pancoast tumours                                                                                                                                                                                                  | Total interval                                                                                                                                                                       | N 48<br>88%male<br><br>Median age<br>65.5 yrs                         |                                                                                          |                    |                    |                              |                                    |                         |                                                                | Mean 108.2<br>(range 14 –<br>349)                                                           |                                                                                                                                                                | 4.4<br>4.1<br>4.2<br>4.6<br>4.7<br>1.9<br>4.5<br>4.11<br>3.7                                                                           |                                                                                                      |                                              |

| #    | BIBLIOMETRIC<br>S              | STUDY<br>DESIGN<br><br>Region, Year                                                                                                                                            | DATA<br>SOURCE                                     | AIMS                                                                                                                                                                                                              | OUTCOME<br>MEASURES<br>OF INTEREST<br>/ DEFINITIONS                                     | RESULTS:<br>Patient<br>Demographics                                                                         | Time intervals in lung cancer pathway by Olesen's definitions <sup>1</sup> or equivalent                                    |                    |                                                  |     |                                                                             |                                                                                                                                  |                                                                                                                          |                                                                                                                                                     | SUGGESTED<br>FACTORS<br>RESPONSIBL<br>E FOR DELAY                                    | Guidelines applied on<br>target times?                                                                                                                                                                       | Involvement of<br>Fast Track<br>System? |
|------|--------------------------------|--------------------------------------------------------------------------------------------------------------------------------------------------------------------------------|----------------------------------------------------|-------------------------------------------------------------------------------------------------------------------------------------------------------------------------------------------------------------------|-----------------------------------------------------------------------------------------|-------------------------------------------------------------------------------------------------------------|-----------------------------------------------------------------------------------------------------------------------------|--------------------|--------------------------------------------------|-----|-----------------------------------------------------------------------------|----------------------------------------------------------------------------------------------------------------------------------|--------------------------------------------------------------------------------------------------------------------------|-----------------------------------------------------------------------------------------------------------------------------------------------------|--------------------------------------------------------------------------------------|--------------------------------------------------------------------------------------------------------------------------------------------------------------------------------------------------------------|-----------------------------------------|
|      |                                |                                                                                                                                                                                |                                                    |                                                                                                                                                                                                                   |                                                                                         |                                                                                                             | GP-LCS<br>interval                                                                                                          | Doctor<br>Interval | System<br>Interval                               | PCI | SCI                                                                         | Diagnosti<br>c Interval                                                                                                          | Treatment Interval                                                                                                       | Total<br>interval                                                                                                                                   |                                                                                      |                                                                                                                                                                                                              |                                         |
|      |                                |                                                                                                                                                                                |                                                    |                                                                                                                                                                                                                   |                                                                                         |                                                                                                             |                                                                                                                             |                    |                                                  |     |                                                                             |                                                                                                                                  |                                                                                                                          |                                                                                                                                                     |                                                                                      |                                                                                                                                                                                                              |                                         |
| 123. | Mackillop et.,<br>1994(146)    | Retrospective<br>study<br><br>Canada 1990                                                                                                                                      | OCTRF<br>database                                  | To describe the<br>waiting times to<br>radiotherapy in<br>Ontario                                                                                                                                                 | GPLCS interval<br><br>Treatment<br>interval<br><br>Other:<br>LCS to Rx<br>(XRT)         | N1 (high dose ><br>40Gy) = 2028<br><br>N2 (Low dose<br><40Gy) = 3245                                        | Median for<br>high dose<br>group LCS to<br>Rx (XRT) = 77<br><br>Median for<br>low dose<br>group LCS to<br>Rx (XRT)<br>= ??? |                    |                                                  |     |                                                                             | Median high = 27.3<br>days<br><br>Median low = 28.5                                                                              |                                                                                                                          | Median for<br>high dose<br>group LCS to<br>Rx (XRT) =<br>20<br><br>Median for<br>low dose<br>group LCS to<br>Rx (XRT) =<br>12?                      | 2.7<br>3.3 (c)                                                                       | Canadian Association<br>of Radiation<br>Oncologists: 2 weeks<br>for GPLCS and LCS<br>to Rx (XRT) (103)<br><br>80% met GPLCS<br><br>38% met LCS to Rx                                                         |                                         |
| 124. | Mackillop et al.,<br>1995(147) | Survey study<br><br>Canada and<br>USA                                                                                                                                          | Clinician<br>interviews                            | To compared how<br>long patients wait<br>for radiotherapy in<br>Canada and USA                                                                                                                                    | GPLCS<br><br>LCS to XRT<br><br>SCI                                                      | N/A – results of<br>clinician<br>questionnaires                                                             | Canada:<br>Median 11d<br><br>USA:<br>Median 3d                                                                              |                    |                                                  |     | Canada:<br>Median<br>34d<br><br>USA:<br>Median<br>9d                        |                                                                                                                                  |                                                                                                                          | LCS to XRT:<br>Canada:<br>Median 21d<br><br>USA:<br>Median 6d                                                                                       | 3.2<br>3.3 (c)                                                                       |                                                                                                                                                                                                              |                                         |
| 125. | Kim et al.,<br>2016(148)       | Cancer<br>registry study<br><br>Alberta,<br>Canada 2004 -<br>2011                                                                                                              | Alberta cancer<br>registry,<br>billings and<br>EMR | To quantify<br>diagnostic and<br>treatment delays in<br>St I/III (potentiall<br>curable) NSCLC in<br>Alberta and factors<br>associated with<br>delays                                                             | Treatment<br>interval<br><br>System interval                                            | N 3009<br><br>Age 69yrs<br>54% male<br>St I 29%<br>St III 69%<br>100% NSCLC                                 |                                                                                                                             |                    | Median 78<br>d                                   |     |                                                                             | Median 51d (to all<br>forms)                                                                                                     |                                                                                                                          |                                                                                                                                                     | 3.3 (a)<br>1.25<br>1.15<br>3.6<br>4.7<br>5.5<br>5.1<br>5.9<br>1.18 (a)<br>4.5<br>4.1 | BTS(2), Danish Lung<br>Cancer Group(11),<br>Alberta Thoracic<br>Oncology Program<br><br>Author identified<br>delays as those<br>exceeding medians<br>but did not report %<br>exceeding delays as<br>a group. |                                         |
| 126. | Hunnibell et al.,<br>2012(149) | Prospective<br>tracking study<br><br>DVA, USA<br><br>2007 -<br>2010                                                                                                            | Medical<br>records                                 | To improve the<br>timeliness of lung<br>cancer care by<br>filling the new<br>position in 2007 of<br>cancer care<br>coordinator with an<br>advanced practice<br>nurse (APN)<br>functioning as a<br>nurse navigator | System interval<br><br>Other:<br>Scan to LCS                                            | N for 2007<br>= 57<br><br>N for 2010 = 66<br><br>No other<br>demogs given                                   |                                                                                                                             |                    | Median 40<br>in 2007<br><br>Median 45<br>in 2010 |     |                                                                             |                                                                                                                                  |                                                                                                                          | Scan to Dx:<br><br>Median 13 (n<br>37) in 2007<br><br>Median 10<br>(N 36) in<br>2010                                                                | 5.5<br>4.5                                                                           | No                                                                                                                                                                                                           | Yes; nurse<br>navigator                 |
| 127. | Lai et al.,<br>2011(150)       | Retrospective<br>comparative<br>cohort study of<br>patients<br>referred to<br>lung cancer<br>clinics for<br>investigation of<br>suspicious<br>imaging from<br>2006-2007.<br>UK | Medical<br>records                                 | To assess the<br>impact of a fast<br>track CT pathway to<br>select patients for<br>lung cancer clinics<br>on clinic efficiency,<br>diagnostic and<br>treatment delays,<br>and patient<br>satisfaction.            | SCI<br><br>Other:<br>Referral to<br>Decision to<br>treat                                | Samples:<br>N 2006 = 124<br>Mean age 66<br>yrs, 57% male<br><br>N 2007 = 86<br>Mean age 68<br>yrs, 60% male |                                                                                                                             |                    |                                                  |     | For<br>2006:<br>median<br>(IQR) =<br>55 (36)<br><br>For<br>2007: 49<br>(36) |                                                                                                                                  | Other<br>(Referral to<br>decision to<br>treat)<br><br>For 2006:<br>median (IQR)<br>= 42 (30)<br><br>For 2007: 35<br>(23) | 5.6<br>4.2 (a)<br>4.5                                                                                                                               |                                                                                      |                                                                                                                                                                                                              |                                         |
| 128. | Aasebo et al.,<br>2011(151)    | Retrospective<br>study<br><br>University<br>Hospital of<br>North Norway<br><br>2006 - 2009                                                                                     | Medical<br>Records                                 | To improve quality<br>and shorten the<br>workup time for<br>patients with lung<br>cancer using the<br>Lean quality<br>improvement<br>process to improve<br>patient flow                                           | Treatment<br>interval to<br>surgery<br><br>Other: scan to<br>diagnosis<br><br>CXR to CT | N before Lean<br>in 2006 – 2008<br>= 40<br><br>N after Lean<br>(2009) = 33                                  |                                                                                                                             |                    |                                                  |     |                                                                             | Median before lean<br>for<br>surgery/chemo/XR<br>T = 26.5/6/5.5<br><br>Median to surgery<br>in 14 eligible<br>patients = 15 days |                                                                                                                          | Median scan to<br>diagnosis<br>before lean =<br>64<br><br>Median after<br>= 16 days<br><br>Median CXR<br>to CT before<br>= 10<br>And after =<br>5.5 | 4.8<br>4.11<br>4.1                                                                   | Study goal was that<br>85% of patients<br>should have scan to<br>Dx < 28 days...final<br>result was that 82%<br>had < 28d                                                                                    |                                         |

### APPENDIX 3: Comparison of median time intervals (days) by region and local guidelines

| Time Interval                            | Total number of studies reporting median<br>(N / 128) | Median of median (days)<br><br>[range of medians] | Median time intervals (days) by region |                       |                      |                 |                           |             |               |        |
|------------------------------------------|-------------------------------------------------------|---------------------------------------------------|----------------------------------------|-----------------------|----------------------|-----------------|---------------------------|-------------|---------------|--------|
|                                          |                                                       |                                                   | Minimum – Maximum *                    |                       |                      |                 |                           |             |               |        |
|                                          |                                                       |                                                   | [Number of studies]                    |                       |                      |                 |                           |             |               |        |
|                                          |                                                       |                                                   | UK                                     | Europe (excluding UK) | USA                  | Canada          | Australia and New Zealand | Asia        | South America | Africa |
| GP – LCS <sup>1</sup>                    | 28                                                    | 7<br>[0 - 33]                                     | 1 – 12<br>[n=12]                       | 1 - 33<br>[n=5]       | 1– 5<br>[n=3]        | 4 – 17<br>[n=4] | 0 – 18<br>[n=4]           | -           | -             | -      |
| Local maximum guideline timeframe (days) |                                                       |                                                   | 7(2) - 14(6)                           | 7(2) - 14(6)          | 1 (if ‘urgent’)(152) | n/a             | 14(153)                   | n/a         |               |        |
| Doctor <sup>2</sup>                      | 5                                                     | 15<br>[0 – 71]                                    | -                                      | 0 – 24<br>[n=2]       | 15 - 71<br>[n=2]     | -               | -                         | 13<br>[n=1] | -             | -      |
| Local guideline timeframe target (days)  |                                                       |                                                   | n/a                                    | 28(154)               | n/a                  |                 |                           |             |               |        |
| Primary Care <sub>3</sub>                | 17                                                    | 16<br>[7 – 52]                                    | 11 – 52<br>[n=4]                       | 7 – 33<br>[n=7]       | 9.5 – 14<br>[n=2]    | 27<br>[n=1]     | 8.4 - 9<br>[n=2]          | 50<br>[n=1] | -             | -      |
| Local maximum guideline timeframe (days) |                                                       |                                                   | n/a                                    |                       |                      |                 |                           |             |               |        |

| Time Interval                            | Total number of studies reporting median (N / 128) | Median of median (days) [range of medians] | Median time intervals (days) by region |                                |                 |                      |                           |               |               |        |
|------------------------------------------|----------------------------------------------------|--------------------------------------------|----------------------------------------|--------------------------------|-----------------|----------------------|---------------------------|---------------|---------------|--------|
|                                          |                                                    |                                            | Minimum – Maximum *                    |                                |                 |                      |                           |               |               |        |
|                                          |                                                    |                                            | [Number of studies]                    |                                |                 |                      |                           |               |               |        |
|                                          |                                                    |                                            | UK                                     | Europe (excluding UK)          | USA             | Canada               | Australia and New Zealand | Asia          | South America | Africa |
| Secondary Care <sup>4</sup>              | 22                                                 | 41 [9 – 75]                                | 34 – 75 [n=10]                         | 29 – 58 [n=4]                  | 9 – 59 [n=3]    | 34 – 45 [n=3]        | 53 – 64 [n=2]             | -             | -             | -      |
| Local maximum guideline timeframe (days) |                                                    |                                            | 49(155) - 62(6, 86)                    | 42 in 85% patients(11)         | n/a             |                      | 42(153)                   | n/a           |               |        |
| Diagnostic <sup>5</sup>                  | 21                                                 | 47 [8 – 187]                               | 35 – 121 [n=6]                         | 8 – 62 [n=7]                   | 19 – 187 [n=5]  | 145 [n=1]            | 19 - 20 [n=1]             | -             | 18 [n=1]      | -      |
| Local maximum guideline timeframe (days) |                                                    |                                            | n/a                                    |                                |                 | 28(36)               | n/a                       |               |               |        |
| Treatment <sup>6</sup>                   | 46                                                 | 27 [6 – 80]                                | 8 – 35 [n=4]                           | 6 – 39 [n=12]                  | 15 – 57 [n=13]  | 16 – 80 [n=10]       | 30 – 33 [n=3]             | 20 – 25 [n=3] | 20 [n=1]      | -      |
| Local maximum guideline timeframe (days) |                                                    |                                            | 14(6)- 42(6, 26, 155)                  | 14(11, 35, 112) - 42(101, 154) | n/a             | 14 until surgery(36) | 14(10)                    | n/a           |               |        |
| System <sup>7</sup>                      | 9                                                  | 66 [36.5 – 107]                            | -                                      | 62 – 69 [n=2]                  | 36.5 – 84 [n=5] | 65.5 – 107 [n=2]     | -                         | -             | -             | -      |
| Local maximum guideline timeframe (days) |                                                    |                                            | 98(26)                                 | 14(154) - 42(35, 112)          | n/a             |                      |                           |               |               |        |



| Time Interval                            | Total number of studies reporting median (N / 128) | Median of median (days) [range of medians] | Median time intervals (days) by region                                       |                                             |               |                |                           |          |               |        |
|------------------------------------------|----------------------------------------------------|--------------------------------------------|------------------------------------------------------------------------------|---------------------------------------------|---------------|----------------|---------------------------|----------|---------------|--------|
|                                          |                                                    |                                            | Minimum – Maximum *                                                          |                                             |               |                |                           |          |               |        |
|                                          |                                                    |                                            | [Number of studies]                                                          |                                             |               |                |                           |          |               |        |
|                                          |                                                    |                                            | UK                                                                           | Europe (excluding UK)                       | USA           | Canada         | Australia and New Zealand | Asia     | South America | Africa |
| Total <sup>8</sup>                       | 14                                                 | 54 [21 – 109]                              | 21 – 70 [n=2]                                                                | 30 – 108 [n=7]                              | 50 – 52 [n=2] | 51 – 109 [n=2] | -                         | 74 [n=1] | -             | -      |
| Local maximum guideline timeframe (days) |                                                    |                                            | 56 days to surgery(56)                                                       |                                             |               |                |                           |          |               |        |
| Other: LCS to Diagnosis <sup>9</sup>     | 27                                                 | 15 [0 – 70]                                | 0 – 57 [n=9]                                                                 | 2 – 21 [n=8]                                | 8 – 70 [n=4]  | 6 – 21 [n=2]   | 7 – 20 [n=3]              | -        | 18 [n=1]      | -      |
| Local maximum guideline timeframe (days) |                                                    |                                            | 17(6, 156)                                                                   | 21(101) – 28 days for 80% patients(35, 112) | n/a           |                |                           |          |               |        |
| Other: LCS to Treatment <sup>10</sup>    | 30                                                 | 34 [6 – 104]                               | 13 – 94 [n=7]                                                                | 25 – 94 [n=4]                               | 6 – 104 [n=4] | 7 – 82 [n=13]  | 64 [n=1]                  | 34 [n=1] | -             | -      |
| Local maximum guideline timeframe (days) |                                                    |                                            | 2/14/28 and 56 days to urgent/ palliative / definitive radiation therapy and | 35(101)                                     |               |                |                           |          |               |        |

| Time Interval | Total number of studies reporting median<br><br>(N / 128) | Median of median (days)<br><br>[range of medians] | Median time intervals (days) by region |                       |     |        |                           |      |               |        |
|---------------|-----------------------------------------------------------|---------------------------------------------------|----------------------------------------|-----------------------|-----|--------|---------------------------|------|---------------|--------|
|               |                                                           |                                                   | Minimum – Maximum <sup>‡</sup>         |                       |     |        |                           |      |               |        |
|               |                                                           |                                                   | <i>[Number of studies]</i>             |                       |     |        |                           |      |               |        |
|               |                                                           |                                                   | UK                                     | Europe (excluding UK) | USA | Canada | Australia and New Zealand | Asia | South America | Africa |
|               |                                                           |                                                   | thoracotomy, respectively (2, 48)      |                       |     |        |                           |      |               |        |

\*Or median time interval reported when only one available study. <sup>1</sup> GP-LCS interval: GP referral to Secondary Care to first LCS appointment; <sup>2</sup> Doctor interval: First presentation to first suspicious investigation result; <sup>3</sup> Primary Care interval: First presentation to first GP referral to Secondary Care; <sup>4</sup> Secondary Care interval: First GP referral to Secondary Care to treatment commencement; <sup>5</sup> Diagnostic interval: First presentation to confirmed diagnosis; <sup>6</sup> Treatment interval: Confirmed diagnosis to treatment start; <sup>7</sup> System interval: First suspicious investigation result to treatment commencement; <sup>8</sup> Total interval: First presentation to treatment commencement; <sup>9</sup> LCS to Diagnosis interval: first LCS appointment to confirmed diagnosis; <sup>10</sup> LCS to Treatment interval: first LCS appointment to treatment commencement.

ABBREVIATIONS: GP: General Practitioner; LCS: Lung Cancer Specialist; UK: United Kingdom, USA: United States of America; n/a: not available

#### APPENDIX 4: General Practitioner to Lung Cancer Specialist intervals and adherence with timeframes

| Study                  | Sample size for interval | Year(s) conducted | Region         | Median GP-LCS interval (days)* | IQR         | % Patients within recommended timeframe | Origin of timeframe; maximum wait (days) |
|------------------------|--------------------------|-------------------|----------------|--------------------------------|-------------|-----------------------------------------|------------------------------------------|
| Sood et al.(139)       | 33                       | 2004              | New Zealand    | 18                             | 13.5 – 21.5 | 9                                       | BTS(2); ≤ 7                              |
| Lovgren et al.(111)    | 308                      | 2003              | Sweden         | 16                             | -           | 27                                      | SLCG(112); ≤ 7 days                      |
| Stevens et al.(157)    | 160                      | 2004              | New Zealand    | 12                             | 0 - 30      | 38                                      | BTS(2); ≤ 7                              |
| Neal et al.(52)        | 313                      | 2000 - 2001       | United Kingdom | 10                             | 4 - 17      | 57                                      | NHS(6); ≤ 14                             |
| Forrest et al.(156)    | 14507                    | 2006 - 2010       | United Kingdom | 10                             | 6 - 17      | 70                                      | NHS(6); ≤ 14                             |
| Rolke et al.(158)      | 463                      | 2005 - 2007       | Norway         | 1                              | 0 - 7       | 71                                      | BTS(2), SLCG(35); ≤ 7                    |
| Mackillop et al. (146) | 2028                     | 1990              | Canada         | 7                              | -           | 80                                      | CARO(103); ≤ 14                          |
| Neal et al.(52)        | 96                       | 2000 - 2001       | United Kingdom | 10                             | 6 - 13      | 89                                      | NHS(6); ≤ 14                             |

ABBREVIATIONS: GP: General Practitioner; LCS: Lung Cancer Specialist; IQR: Interquartile Range; BTS: British Thoracic Society; SLCG: Swedish Lung Cancer Group; NHS: National Health Service; CARO: Canadian Association of Radiation Oncologists.

\*unless stated otherwise

## APPENDIX 5: Treatment intervals and adherence with timeframes

| Study                        |  | Sample size for interval | Year(s) conducted | Region         | Median Treatment interval (days)* | IQR*          | Treatment modality | % Patients within recommended timeframe | Origin of timeframe; maximum wait (days) |
|------------------------------|--|--------------------------|-------------------|----------------|-----------------------------------|---------------|--------------------|-----------------------------------------|------------------------------------------|
| <b>Melling et al.(57)</b>    |  | 148                      | 1993              | United Kingdom | 28                                | -             | All                | 23                                      | SIGN(49), SMAC(56); ≤ 56                 |
| <b>Shin et al.(119)</b>      |  | 398                      | 2006 – 2011       | Korea          | 20                                | Range 1 – 302 | Surgery            | 29                                      | Fradet et al.(159); between 14 – 28      |
| <b>Knorst et al.(106)</b>    |  | 69                       | 1990 – 1998       | Brazil         | 20                                | 0 – 36        | Surgery            | 30                                      | N/S; ≤ 30                                |
| <b>Yilmaz et al.(129)</b>    |  | 138                      | 2005 – 2006       | Turkey         | 19                                | -             | Surgery            | 30                                      | BTS(2), Canadian(36); ≤ 14               |
| <b>Perez et al.(160)</b>     |  | 198                      | 2001 – 2002       | Spain          | 39                                | 17 – 66       | All                | 42                                      | N/S; ≤ 30                                |
| <b>Bilimoria et al.(134)</b> |  | 54,338                   | 2003 – 2005       | USA            | 35                                | • -           | Surgery            | 43                                      | N/S; ≤ 30                                |
| <b>Forrest et al.(156)</b>   |  | 14962                    | 2006 - 2010       | United Kingdom | 35                                | 21 - 55       | All                | 43                                      | NHS(6); ≤ 31                             |
| <b>Largey et al.(9)</b>      |  | 75                       | 2013              | Australia      | Mean 30                           | -             | All                | 45                                      | VLCCR(10), DLCCG(11); ≤ 14               |
| <b>Sulu et al.(34)</b>       |  | 101                      | 2009              | Turkey         | 21                                | -             | All                | 43.6                                    | SLCCG(112), Canadian(36); ≤ 14           |
| <b>Salomaa et al.(39)</b>    |  | 111                      | 2005              | Finland        | 15                                | -             | All                | 49                                      | SLCCG(112); ≤ 14                         |
| <b>Brocken</b>               |  | 215                      | 1999 -            | Netherlands    | 19                                | 6.5 –         | All                | 52.5                                    | BTS(2),Dutch(161);                       |

|                             |  |        |             |           |         |               |     |                          |                                                               |
|-----------------------------|--|--------|-------------|-----------|---------|---------------|-----|--------------------------|---------------------------------------------------------------|
| <b>et al.(100)</b>          |  |        | 2009        |           |         | 27            |     |                          | ≤ 14                                                          |
| <b>Yerdakul et al.(127)</b> |  | 750    | 2010 – 2011 | Turkey    | Mean 24 |               | All | 57                       | BTS(2), Canadian(36); ≤ 14                                    |
| <b>Gomez et al.(70)</b>     |  | 10,554 | 2004 - 2007 | USA       | 27      | -             | All | 63                       | USA(71); ≤ 35                                                 |
| <b>Schultz et al.(116)</b>  |  | 1910   | 2002 – 2006 | USA       | 27      | 10 – 48       | All | 63                       | RAND(26); ≤ 42                                                |
| <b>Akash et al.(94)</b>     |  | 139    | 2012 - 2014 | Singapore | 35      | Range 1 - 150 | All | (1)25<br>(2) 51<br>(3)71 | (1) SLCG(112); ≤ 14<br>(2) NHS(6); ≤ 31<br>(3) RAND(26); ≤ 42 |
| <b>Vidaver et al.(30)</b>   |  | 227    | 2012 - 2014 | USA       | 15      | 0 - 180       | All | 79                       | BTS(2)≤ 56 for surgical patients ,<br>RAND(26); ≤ 42          |

\*unless specified otherwise

ABBREVIATIONS: IQR: Interquartile Range; SIGN: Scottish Intercollegiate Guidelines Network; SMAC: Standing Medical Advisory Committee; BTS: British Thoracic Society; NHS: National Health Service; VLCR: Victorian Lung Cancer Registry; DLCR: Danish Lung Cancer Registry; SLCG: Swedish Lung Cancer Group; USA: United States of America; RAND: Research and Development; N/S: Not Specified.

## APPENDIX 6: Coding System of factors implicated in inappropriate delays

|   | 1. Patient factors                                                                                                                                      | 2. Primary Care                                                                                               | 3. Secondary Care                                                                                                                  | 4. Diagnostic tests                                                                             | 5. Other                                                                                  |
|---|---------------------------------------------------------------------------------------------------------------------------------------------------------|---------------------------------------------------------------------------------------------------------------|------------------------------------------------------------------------------------------------------------------------------------|-------------------------------------------------------------------------------------------------|-------------------------------------------------------------------------------------------|
| 1 | 1.1 Lower educational level<br>a. Elementary school                                                                                                     | 2.1 Lack of follow up appointments made                                                                       | 3.1 Delays in Secondary Care as a whole / resources                                                                                | 4.1 Waiting times                                                                               | 5.1 Lack of centralised secondary / tertiary care facilities                              |
| 2 | 1.2 Age<br>a. Older<br>b. Younger                                                                                                                       | 2.2 A defeatist attitude preventing referral                                                                  | 3.2 Limited access to specialists                                                                                                  | 4.2 High false negative rates with investigation                                                | 5.2 Lack of communication between ED and Primary Care provider                            |
| 3 | 1.3 Insurance type<br>a. No health insurance<br>b. Private health insurance<br>c. National Medicare or local equivalent<br>d. Regional/county insurance | 2.3 Index of suspicion not high enough to meet threshold for referral for diagnostic testing / Secondary Care | 3.3 Delays in treatment appointment<br>a. Surgery<br>b. Chemotherapy<br>c. Radiotherapy<br>d. Chemoradiation e. Palliative service | 4.3 Delay in return of results                                                                  | 5.3 No regulated referral system between primary and secondary/tertiary care              |
| 4 | 1.4 Race<br>a. Non-white                                                                                                                                | 2.4 Poor awareness of symptoms of high PPV                                                                    | 3.4 Hospital type<br>a. Public<br>b. Private<br>c. Teaching<br>d. Non-academic hospital                                            | 4.4 Access to investigations of high diagnostic yield                                           | 5.4 Introduction of regulated referral system between primary and secondary/tertiary care |
| 5 | 1.5 Household income / socioeconomic position (SEP)<br>a. Low<br>b. Middle<br>c. High                                                                   | 2.5 Lack of communication/information with Secondary Care providers                                           | 3.5 Referral to surgeon for opinion on operability                                                                                 | 4.5 Multiple attempts (at invasive procedures) to establish diagnosis or operability of patient | 5.5 Lack of a cancer care co-ordinator                                                    |
| 6 | 1.6 Missing / declining / delaying follow up appointments                                                                                               | 2.6 Delay in referral to Secondary Care                                                                       | 3.6 Need for multiple specialists' consultations                                                                                   | 4.6 Delay to staging                                                                            | 5.6 Lack of rapid / multidisciplinary assessment clinic                                   |
| 7 | 1.7 Gender<br>a. female<br>b. male                                                                                                                      | 2.7 Absence of Primary Care physician                                                                         | 3.7 Index of suspicion not high enough for further investigation                                                                   | 4.7 Delays in obtaining results of molecular studies                                            | 5.7 Higher number of visits prior to diagnosis                                            |

|    |                                                                                                                             |                                                                                 |                                                                        |  |                                                 |
|----|-----------------------------------------------------------------------------------------------------------------------------|---------------------------------------------------------------------------------|------------------------------------------------------------------------|--|-------------------------------------------------|
| 8  | 1.8 Medical comorbidities<br>a. Chronic respiratory condition (asthma, COPD)<br>b. Condition other than chronic respiratory | 2.8 Lack of knowledge of efficiency of diagnostic tests                         | 3.8 Lack of communication with Primary Care provider regarding results |  | 5.8 Information overload on referral guidelines |
| 9  | 1.9 Born overseas                                                                                                           | 2.9 Passive and/or unstructured history taking of potentially high risk patient | 3.9 No protocol to follow up with patients regarding:                  |  | 5.9 Referral guidelines not accessible          |
| 10 | 1.10 Early Stage                                                                                                            | 2.10 Delay due to PCP giving symptomatic treatment                              | 3.10 Waiting time for hospital bed / longer time for outpatients       |  | 5.10 MDT involvement (i.e. opposite to 5.6)     |
| 11 | 1.11 Lack of symptoms (pt reported or clinically recognised) / “sicker quicker” / lack of high acuity presentation          |                                                                                 | 3.11 Nihilism about treatment options                                  |  |                                                 |
| 12 | 1.12 Tumour type<br>a. NSCLC                                                                                                |                                                                                 |                                                                        |  |                                                 |
| 13 | 1.13 Patient proximity to hospital<br>a. Rural<br>b. Non-rural                                                              |                                                                                 |                                                                        |  |                                                 |
| 14 | 1.14 Plausible alternative diagnosis                                                                                        |                                                                                 |                                                                        |  |                                                 |
| 15 | 1.15 Marital status<br>a. Divorced / separated                                                                              |                                                                                 |                                                                        |  |                                                 |
| 16 | 1.16 Area of profession<br>a. Education                                                                                     |                                                                                 |                                                                        |  |                                                 |
| 17 | 1.17 “Physician shopping” delaying progress in diagnostic                                                                   |                                                                                 |                                                                        |  |                                                 |

|    |                                        |  |  |  |  |
|----|----------------------------------------|--|--|--|--|
|    | workup / delayed treatment<br>decision |  |  |  |  |
| 18 | 1.18 Advanced stage                    |  |  |  |  |



## APPENDIX 7: Coding tally

|       | Frequency | Updated Valid Percent |
|-------|-----------|-----------------------|
| 1     | 8         | 1.1                   |
| 1.1   | 24        | 3.3                   |
| 1.10a | 1         | 0.1                   |
| 1.10b | 1         | 0.1                   |
| 1.10c | 3         | 0.4                   |
| 1.10d | 1         | 0.1                   |
| 1.11  | 8         | 1.1                   |
| 1.11a | 1         | 0.1                   |
| 1.12  | 2         | 0.3                   |
| 1.13  | 35        | 4.8                   |
| 1.14  | 7         | 1.0                   |
| 1.15  | 41        | 5.6                   |
| 1.16  | 5         | 0.7                   |
| 1.17a | 8         | 1.1                   |
| 1.18  | 4         | 0.5                   |
| 1.18a | 7         | 1.0                   |
| 1.18b | 5         | 0.7                   |
| 1.19  | 1         | 0.1                   |
| 1.19a | 1         | 0.1                   |
| 1.19b | 4         | 0.5                   |
| 1.1a  | 1         | 0.1                   |
| 1.2   | 4         | 0.5                   |
| 1.21  | 1         | 0.1                   |
| 1.22a | 1         | 0.1                   |
| 1.23a | 1         | 0.1                   |
| 1.24  | 2         | 0.3                   |
| 1.25  | 1         | 0.1                   |
| 1.2a  | 15        | 2.0                   |

Lack of symptoms  
 Early stage  
 Lower educational level  
 Older age  
 Deferring medical appointments  
 Low index of suspicion  
 Delay in referral to Secondary Care  
 Poor awareness of alarm symptoms  
 Delays in Primary Care as a whole  
 No follow up arranged by clinician  
 Delay to surgical treatment  
 Multiple specialists consulted  
 Delays in Secondary Care as a whole  
 Delays to radiation therapy  
 Waiting time to see LCS  
 Waiting time to diagnostics  
 Access to investigations of high diagnostic yield  
 Multiple attempts to establish diagnosis / operability  
 Delay in staging procedures  
 Delay in return of results  
 Lack of rapid / multidisciplinary assessment clinic  
 No regulated referral system  
 Lack of centralised care  
 Lack of a cancer care co-ordinator  
 Referral guidelines not accessible

| top 5 | Freq | %   |
|-------|------|-----|
| 1.15  | 41   | 5.6 |
| 1.13  | 35   | 4.8 |
| 1.1   | 24   | 3.3 |
| 1.2a  | 15   | 2.0 |
| 1.9   | 10   | 1.4 |
| 2.3   | 27   | 3.7 |
| 2.7   | 17   | 2.3 |
| 2.4   | 15   | 2.0 |
| 2     | 7    | 1.0 |
| 2.1   | 6    | 0.8 |
| 3.3a  | 27   | 3.7 |
| 3.7   | 23   | 3.1 |
| 3.1   | 22   | 3.0 |
| 3.3c  | 14   | 1.9 |
| 3.4   | 13   | 1.8 |
| 4.1   | 41   | 5.6 |
| 4.5   | 24   | 3.3 |
| 4.7   | 19   | 2.6 |
| 4.8   | 15   | 2.0 |
| 4.4   | 12   | 1.6 |
| 5.6   | 26   | 3.6 |
| 5.3   | 16   | 2.2 |
| 5.1   | 12   | 1.6 |
| 5.5   | 6    | 0.8 |
| 5.9   | 5    | 0.7 |

|       |    |     |
|-------|----|-----|
| 1.2b  | 2  | 0.3 |
| 1.3   | 2  | 0.3 |
| 1.3c  | 1  | 0.1 |
| 1.3d  | 1  | 0.1 |
| 1.4   | 1  | 0.1 |
| 1.4a  | 5  | 0.7 |
| 1.5a  | 5  | 0.7 |
| 1.5b  | 2  | 0.3 |
| 1.5c  | 1  | 0.1 |
| 1.6   | 8  | 1.1 |
| 1.6a  | 4  | 0.5 |
| 1.6b  | 2  | 0.3 |
| 1.7a  | 5  | 0.7 |
| 1.7b  | 3  | 0.4 |
| 1.8   | 5  | 0.7 |
| 1.9   | 10 | 1.4 |
| 2     | 7  | 1.0 |
| 2.1   | 6  | 0.8 |
| 2.11  | 5  | 0.7 |
| 2.12  | 4  | 0.5 |
| 2.2   | 5  | 0.7 |
| 2.3   | 27 | 3.7 |
| 2.4   | 15 | 2.0 |
| 2.5   | 4  | 0.5 |
| 2.5a  | 5  | 0.7 |
| 2.5b  | 1  | 0.1 |
| 2.6   | 1  | 0.1 |
| 2.7   | 17 | 2.3 |
| 2.8   | 4  | 0.5 |
| 2.9   | 3  | 0.4 |
| 3.1   | 22 | 3.0 |
| 3.10a | 1  | 0.1 |

|       |    |     |
|-------|----|-----|
| 3.10b | 1  | 0.1 |
| 3.11  | 1  | 0.1 |
| 3.11a | 4  | 0.5 |
| 3.11b | 1  | 0.1 |
| 3.12  | 11 | 1.5 |
| 3.13  | 1  | 0.1 |
| 3.2   | 12 | 1.6 |
| 3.2a  | 1  | 0.1 |
| 3.3   | 2  | 0.3 |
| 3.3a  | 27 | 3.7 |
| 3.3b  | 4  | 0.5 |
| 3.3c  | 14 | 1.9 |
| 3.3d  | 5  | 0.7 |
| 3.3e  | 1  | 0.1 |
| 3.4   | 13 | 1.8 |
| 3.5   | 6  | 0.8 |
| 3.5a  | 4  | 0.5 |
| 3.5c  | 1  | 0.1 |
| 3.5d  | 1  | 0.1 |
| 3.6   | 7  | 1.0 |
| 3.7   | 23 | 3.1 |
| 3.8   | 7  | 1.0 |
| 3.9   | 1  | 0.1 |
| 4.1   | 41 | 5.6 |
| 4.11  | 2  | 0.3 |
| 4.2   | 5  | 0.7 |
| 4.2a  | 4  | 0.5 |
| 4.3   | 1  | 0.1 |
| 4.4   | 12 | 1.6 |
| 4.5   | 24 | 3.3 |
| 4.6   | 9  | 1.2 |
| 4.7   | 19 | 2.6 |

|      |    |     |
|------|----|-----|
| 4.8  | 15 | 2.0 |
| 4.9  | 1  | 0.1 |
| 5.1  | 12 | 1.6 |
| 5.11 | 1  | 0.1 |
| 5.2  | 1  | 0.1 |
| 5.3  | 16 | 2.2 |
| 5.4  | 2  | 0.3 |
| 5.5  | 6  | 0.8 |
| 5.6  | 26 | 3.5 |
| 5.7a | 5  | 0.7 |
| 5.7b | 1  | 0.1 |
| 5.9  | 5  | 0.7 |

|                                  |       |
|----------------------------------|-------|
| Updated<br>Total                 | 733   |
| Updated<br>Cumulative<br>Percent | 100.0 |

## REFERENCES

1. Zivkovic D. Effect of delays on survival in patients with lung carcinoma in Montenegro. *Acta Clin Croat*. 2014;53(4):390-8.
2. BTS recommendations to respiratory physicians for organising the care of patients with lung cancer. The Lung Cancer Working Party of the British Thoracic Society Standards of Care Committee. *Thorax*. 1998;53 Suppl 1:S1-8.
3. Prades J, Espinas JA, Font R, Argimon JM, Borrás JM. Implementing a Cancer Fast-track Programme between primary and specialised care in Catalonia (Spain): a mixed methods study. *British Journal of Cancer*. 2011;105(6):753-9.
4. Murphy DR, Wu L, Thomas EJ, Forjuoh SN, Meyer AN, Singh H. Electronic Trigger-Based Intervention to Reduce Delays in Diagnostic Evaluation for Cancer: A Cluster Randomized Controlled Trial. *Journal of Clinical Oncology*. 2015;33(31):3560-7.
5. Mitchell ED, Rubin G, Macleod U. Understanding diagnosis of lung cancer in primary care: Qualitative synthesis of significant event audit reports. *British Journal of General Practice*. 2013;63(606):e37-e46.
6. The NHS Cancer Plan: a plan for investment, a plan for reform. London, United Kingdom: Department of Health, 2000.
7. Mansson J, Bengtsson C. Pulmonary cancer from the general practitioner's point of view. Experience from the health centre area of Kungsbacka, Sweden. *Scandinavian Journal of Primary Health Care*. 1994;12(1):39-43.
8. Leiro-Fernandez V, Botana-Rial M, Tilve-Gomez A, Represas-Represas C, Pallares-Sanmartin A, Fernandez-Villar A. Effectiveness of a protocolized system to alert pulmonologists of lung cancer radiological suspicion. *Clin Transl Oncol*. 2014;16(1):64-8.
9. Largey G, Ristevski E, Chambers H, Davis H, Briggs P. Lung cancer interval times from point of referral to the acute health sector to the start of first treatment. *Aust Health Rev*. 2016.
10. Stirling RG, Evans SM, McLaughlin P, Senthuren M, Millar J, Gooi J, et al. The Victorian Lung Cancer Registry pilot: improving the quality of lung cancer care through the use of a disease quality registry. *Lung*. 2014;192(5):749-58.
11. Jakobsen E, Green A, Oesterlind K, Rasmussen TR, Iachina M, Palshof T. Nationwide quality improvement in lung cancer care: the role of the Danish Lung Cancer Group and Registry. *J Thorac Oncol*. 2013;8(10):1238-47.
12. Kaergaard Starr L, Osler M, Steding-Jessen M, Lidegaard Frederiksen B, Jakobsen E, Osterlind K, et al. Socioeconomic position and surgery for early-stage non-small-cell lung cancer: A population-based study in Denmark. *Lung Cancer*. 2013;79(3):262-9.
13. Jiwa M, Reid J, Handley C, Grimwood J, Ward S, Turner K, et al. Less haste more speed: Factors that prolong the interval from presentation to diagnosis in some cancers. *Family Practice*. 2004;21(3):299-303.
14. Hsieh VC, Wu TN, Liu SH, Shieh SH. Referral-free health care and delay in diagnosis for lung cancer patients. *Jpn J Clin Oncol*. 2012;42(10):934-9.
15. Hall SE, Holman CD, Threlfall T, Sheiner H, Phillips M, Katriss P, et al. Lung cancer: an exploration of patient and general practitioner perspectives on the realities of care in rural Western Australia. *Aust J Rural Health*. 2008;16(6):355-62.
16. Billing JS, Wells FC. Delays in the diagnosis and surgical treatment of lung cancer. *Thorax*. 1996;51(9):903-6.
17. Dalton SO, Frederiksen BL, Jacobsen E, Steding-Jessen M, Østerlind K, Schüz J, et al. Socioeconomic position, stage of lung cancer and time between referral and diagnosis in Denmark, 2001-2008. *British Journal of Cancer*. 2011;105(7):1042-8.
18. Iachina M, Jakobsen E, Fallesen AK, Green A. Transfer between hospitals as a predictor of delay in diagnosis and treatment of patients with Non-Small Cell Lung Cancer - a register based cohort-study. *BMC Health Serv Res*. 2017;17(1):267.

19. Ringbaek T, Borgeskov S, Lange P, Viskum K. Diagnostic and therapeutic process and prognosis in suspected lung cancer. *Scand Cardiovasc J*. 1999;33(6):337-43.
20. Cattaneo SM, Geronimo MCM, Putscher TMJ, Brady-Copertino C, Meisenberg BR. Improved coordination of care for patients with abnormal chest imaging: The rapid access chest and lung assessment program. *Journal of Clinical Outcomes Management*. 2014;21(10):453-8.
21. Yoshida R, Arakawa H, Kaji Y. Lung cancer in chronic interstitial pneumonia: Early manifestation from serial CT observations. *American Journal of Roentgenology*. 2012;199(1):85-90.
22. Bowen EF, Rayner CFJ. Patient and GP led delays in the recognition of symptoms suggestive of lung cancer [1]. *Lung Cancer-J Iaslc*. 2002;37(2):227-8.
23. Referral guidelines for suspected cancer., (2000).
24. Yorio JT, Xie Y, Yan J, Gerber DE. Lung cancer diagnostic and treatment intervals in the United States: a health care disparity? *Journal of Thoracic Oncology: Official Publication of the International Association for the Study of Lung Cancer*. 2009;4(11):1322-30.
25. Shershneva MB, Vidaver, R. M., Campbell, T.C., Ji-Hye Kim, M.S., Osley, E., Oettel, M.D. Timeliness of Lung cancer care: Assessing the needs and Measuring outcomes using Patient Interviews. *CE Measure*. 2013;7:81 - 5.
26. Reifel J. RAND Cooperation Quality of Care for Oncologic Conditions and HIV: A Review of the Literature and Quality Indicators. . *Lung Cancer-J Iaslc*. Santa Monica, California, USA2000. p. 133 - 71.
27. Winget M, Turner D, Tonita J, King C, Nugent Z, Alvi R, et al. Across-province standardization and comparative analysis of time-to-care intervals for cancer. *BMC Cancer*. 2007;7:186.
28. 10 Steps to a Common Framework for Reporting on Wait Times. Health Council of Canada, 2005.
29. Wang L, Correa CR, Hayman JA, Zhao L, Cease K, Brenner D, et al. Time to treatment in patients with stage III non-small cell lung cancer. *Int J Radiat Oncol Biol Phys*. 2009;74(3):790-5.
30. Vidaver RM, Shershneva MB, Hetzel SJ, Holden TR, Campbell TC. Typical Time to Treatment of Patients With Lung Cancer in a Multisite, US-Based Study. *J Oncol Pract*. 2016;12(6):e643-53.
31. Evans SM, Earnest A, Bower W, Senthuren M, McLaughlin P, Stirling R. Timeliness of lung cancer care in Victoria: a retrospective cohort study. *Med J Aust*. 2016;204(2):75 e1-9.
32. England N. Everyone counts: planning for patients 2014/15 to 2018/19 Leeds2013 [Available from: <https://www.england.nhs.uk/wp-content/uploads/2013/12/5yr-strat-plann-guid-wa.pdf>].
33. Topping ML, Frydenberg M, Hansen RP, Olesen F, Vedsted P. Evidence of increasing mortality with longer diagnostic intervals for five common cancers: a cohort study in primary care. *Eur J Cancer*. 2013;49(9):2187-98.
34. Sulu E, Tasolar O, Berk Takir H, Yagci Tuncer L, Karakurt Z, Yilmaz A. Delays in the diagnosis and treatment of non-small-cell lung cancer. *Tumori*. 2011;97(6):693-7.
35. Myrdal G, Lambe M, Hillerdal G, Lamberg K, Agustsson T, Stahle E. Effect of delays on prognosis in patients with non-small cell lung cancer. *Thorax*. 2004;59(1):45-9.
36. Simunovic M, Gagliardi A, McCready D, Coates A, Levine M, DePetrillo D. A snapshot of waiting times for cancer surgery provided by surgeons affiliated with regional cancer centres in Ontario. *Canadian Society of Surgical Oncology. CMAJ*. 2001;165(4):421-5.
37. Smith MW, Davis Giardina T, Murphy DR, Laxmisan A, Singh H. Resilient actions in the diagnostic process and system performance. *BMJ Qual Saf*. 2013;22(12):1006-13.
38. Sawicki M, Szczurek M, Krawczyk P, Rybojad P, Jablonka A, Milanowski J. Reasons for delay in diagnosis and treatment of lung cancer among patients in Lublin Voivodeship who were consulted in Thoracic Surgery Department. *Ann Agric Environ Med*. 2013;20(1):72-6.

39. Salomaa ER, Sallinen S, Hiekkanen H, Liippo K. Delays in the diagnosis and treatment of lung cancer. *Chest*. 2005;128(4):2282-8.
40. Rolke HB, Bakke PS, Gallefoss F. Delays in the diagnostic pathways for primary pulmonary carcinoma in Southern Norway. *Respir Med*. 2007;101(6):1251-7.
41. Redaniel MT, Martin RM, Ridd MJ, Wade J, Jeffreys M. Diagnostic intervals and its association with breast, prostate, lung and colorectal cancer survival in England: Historical cohort study using the Clinical Practice Research Datalink. *PLoS ONE*. 2015;10 (5) (no pagination)(e0126608).
42. Radzikowska E, Roszkowski-Sliz K, Chabowski M, Glaz P. Influence of delays in diagnosis and treatment on survival in small cell lung cancer patients. *Adv Exp Med Biol*. 2013;788:355-62.
43. Buccheri G, Ferrigno D. Lung cancer: clinical presentation and specialist referral time. *Eur Respir J*. 2004;24(6):898-904.
44. Ost DE, Jim Yeung SC, Tanoue LT, Gould MK. Clinical and organizational factors in the initial evaluation of patients with lung cancer: Diagnosis and management of lung cancer, 3rd ed: American College of Chest Physicians evidence-based clinical practice guidelines. *Chest*. 2013;143(5 Suppl):e121S-e41S.
45. Powell AA, Schultz EM, Ordin DL, Enderle MA, Graham BA, Partin MR, et al. Timeliness across the continuum of care in veterans with lung cancer. *J Thorac Oncol*. 2008;3(9):951-7.
46. Ozlu T, Bulbul Y, Oztuna F, Can G. Time course from first symptom to the treatment of lung cancer in the Eastern Black Sea Region of Turkey. *Med Princ Pract*. 2004;13(4):211-4.
47. O'Rourke N, Edwards R. Lung cancer treatment waiting times and tumour growth. *Clin Oncol (R Coll Radiol)*. 2000;12(3):141-4.
48. Reducing delays in cancer treatment: some targets. London: Joint Council for Clinical Oncology, Royal College of Physicians, 1993.
49. Scottish Intercollegiate Guidelines Network: lung cancer (SIGN), (1998).
50. Neal RD, Din NU, Hamilton W, O.C GB, Carter B, Stapley S, et al. Comparison of cancer diagnostic intervals before and after implementation of NICE guidelines: Analysis of data from the GBR General Practice Research Database. *British Journal of Cancer*. 2014;110(3):584-92.
51. Referral guidelines for suspected cancer. London, UK: National Institute for Health and Clinical Excellence (NICE), 2005.
52. Neal RD, Allgar VL, Ali N, Leese B, Heywood P, Proctor G, et al. Stage, survival and delays in lung, colorectal, prostate and ovarian cancer: comparison between diagnostic routes. *Br J Gen Pract*. 2007;57(536):212-9.
53. Din NU, Ukoumunne OC, Rubin G, Hamilton W, Carter B, Stapley S, et al. Age and Gender Variations in Cancer Diagnostic Intervals in 15 Cancers: Analysis of Data from the UK Clinical Practice Research Datalink. *PLoS One*. 2015;10(5):e0127717.
54. Nadpara P, Madhavan SS, Tworek C. Guideline-concordant timely lung cancer care and prognosis among elderly patients in the United States: A population-based study. *Cancer Epidemiol*. 2015;39(6):1136-44.
55. Murray PV, O'Brien ME, Sayer R, Cooke N, Knowles G, Miller AC, et al. The pathway study: results of a pilot feasibility study in patients suspected of having lung carcinoma investigated in a conventional chest clinic setting compared to a centralised two-stop pathway. *Lung Cancer*. 2003;42(3):283-90.
56. Whitehouse J. Management of lung cancer: current clinical practices (Whitehouse report). Standing Medical Advisory Committee (SMAC): 1994.
57. Melling PP, Hatfield AC, Muers MF, Peake MD, Storer CJ, Round CE, et al. Lung cancer referral patterns in the former Yorkshire region of the UK. *British Journal of Cancer*. 2002;86(1):36-42.
58. Lo DS, Zeldin RA, Skrastins R, Fraser IM, Newman H, Monavvari A, et al. Time to treat: a system redesign focusing on decreasing the time from suspicion of lung cancer to diagnosis. *J Thorac Oncol*. 2007;2(11):1001-6.

59. The Ontario Provincial Wait Time Strategy 2007 (2007).
60. Lewis NR, Le Jeune I, Baldwin DR. Under utilisation of the 2-week wait initiative for lung cancer by primary care and its effect on the urgent referral pathway. *Br J Cancer*. 2005;93(8):905-8.
61. Larsen MB, Hansen RP, Hansen DG, Olesen F, Vedsted P. Secondary care intervals before and after the introduction of urgent referral guidelines for suspected cancer in Denmark: a comparative before-after study. *BMC Health Serv Res*. 2013;13:348.
62. Largey G, Chakraborty S, Tobias T, Briggs P, Mazza D. Audit of referral pathways in the diagnosis of lung cancer: a pilot study. *Aust J Prim Health*. 2015;21(1):106-10.
63. Krishnasamy M, Wilkie E, Haviland J. Lung cancer health care needs assessment: patients' and informal carers' responses to a national mail questionnaire survey. *Palliat Med*. 2001;15(3):213-27.
64. Recommended standards for improved lung cancer care: the interface between primary care and hospital practice. Recommendations from an interactive regional meeting between General Practitioners and hospital specialists. , (1995).
65. Koyi H, Hillerdal G, Branden E. Patient's and doctors' delays in the diagnosis of chest tumors. *Lung Cancer-J Int Assoc*. 2002;35(1):53-7.
66. Jiwa M, Maujean E, Spilsbury K, Threlfall T. The trajectory of lung cancer patients in Western Australia--a data linkage study: still a grim tale. *Lung Cancer-J Int Assoc*. 2010;70(1):22-7.
67. Hansen RP, Vedsted P, Sokolowski I, Sondergaard J, Olesen F. Time intervals from first symptom to treatment of cancer: a cohort study of 2,212 newly diagnosed cancer patients. *BMC Health Serv Res*. 2011;11:284.
68. Gonzalez-Barcala FJ, Falagan JA, Garcia-Prim JM, Valdes L, Carreira JM, Puga A, et al. Timeliness of care and prognosis in patients with lung cancer. *Ir J Med Sci*. 2014;183(3):383-90.
69. González JM, De Castro FJ, Barrueco M, Cordovilla R, Fernández JL, Gómez FP, et al. Delays in the Diagnosis of Lung Cancer. *Archivos de Bronconeumologia*. 2003;39(10):437-41.
70. Gomez DR, Liao KP, Swisher SG, Blumenschein GR, Erasmus JJ, Jr., Buchholz TA, et al. Time to treatment as a quality metric in lung cancer: Staging studies, time to treatment, and patient survival. *Radiother Oncol*. 2015;115(2):257-63.
71. Lennes IT, Lynch, T.J. Quality indicators in cancer care: development and implementation for improved health outcomes in Non-Small Cell Lung Cancer. . *Clinical Lung Cancer*. 2009;10:341 - 6.
72. Forrest LF, Adams J, Rubin G, White M. The role of receipt and timeliness of treatment in socioeconomic inequalities in lung cancer survival: population-based, data-linkage study. *Thorax*. 2015;70(2):138-45.
73. Fernandez de la Vega JF, Perez H, Samper JA. Lung cancer diagnostic delay in a Havana hospital. *MEDICC Rev*. 2015;17(1):55-8.
74. Emery JD, Walter FM, Gray V, Sinclair C, Howting D, Bulsara M, et al. Diagnosing cancer in the bush: a mixed methods study of GP and specialist diagnostic intervals in rural Western Australia. *Fam Pract*. 2013;30(5):541-50.
75. Ellis PM, Vandermeer R. Delays in the diagnosis of lung cancer. *J Thorac Dis*. 2011;3(3):183-8.
76. Dregan A, Moller H, Charlton J, Gulliford MC. Are alarm symptoms predictive of cancer survival?: population-based cohort study. *Br J Gen Pract*. 2013;63(617):e807-12.
77. Devbhandari MP, Quennell P, Krysiak P, Shah R, Jones MT. Implications of a negative bronchoscopy on waiting times to treatment for lung cancer patients: results of a prospective tracking study. *Eur J Cardiothorac Surg*. 2008;34(3):479-83.
78. Devbhandari MP, Bittar MN, Quennell P, Barber P, Krysiak P, Shah R, et al. Are we achieving the current waiting time targets in lung cancer treatment? Result of a prospective study from a large United Kingdom teaching hospital. *J Thorac Oncol*. 2007;2(7):590-2.
79. Corner J, Hopkinson J, Fitzsimmons D, Barclay S, Muers M. Is late diagnosis of lung cancer inevitable? Interview study of patients' recollections of symptoms before diagnosis. *Thorax*. 2005;60(4):314-9.



80. Comber H, Cronin DP, Deady S, Lorcain PO, Riordan P. Delays in treatment in the cancer services: impact on cancer stage and survival. *Ir Med J.* 2005;98(8):238-9.
81. Campbell N. *British Journal of Cancer* 2002;87(6):585-90.
82. Bozcuk H, Martin C. Does treatment delay affect survival in non-small cell lung cancer? A retrospective analysis from a single UK centre. *Lung Cancer.* 2001;34(2):243-52.
83. Bjerager M, Palshof T, Dahl R, Vedsted P, Olesen F. Delay in diagnosis of lung cancer in general practice. *British Journal of General Practice.* 2006;56(532):863-8.
84. Baughan P, O'Neill B, Fletcher E. Auditing the diagnosis of cancer in primary care: the experience in Scotland. *British Journal of Cancer.* 2009;101 Suppl 2:S87-91.
85. The New NHS, Modern, Dependable., (1997).
86. Cancer in Scotland: Action for Change. Edinburgh, Scotland: Scottish Executive Health Department (SEHD), 2001.
87. Barrett J, Hamilton W. Pathways to the diagnosis of lung cancer in the UK: A cohort study. *BMC Family Practice.* 2008;9 (no pagination)(31).
88. Clinical Guideline 24: The diagnosis and treatment of lung cancer. National Institute for Health and Clinical Excellence (NICE), 2005 September 2006. Report No.
89. Aragonese FG, Moreno N, Leon P, Fontan EG, Folque E, Bronchogenic Carcinoma Cooperative Group of the Spanish Society of P, et al. Influence of delays on survival in the surgical treatment of bronchogenic carcinoma. *Lung Cancer-J Iaslc.* 2002;36(1):59-63.
90. Dische S, Gibson, D., Parmar, M., Saunders, M.I. Time course from first symptom to treatment in patients with non-small cell lung cancer referred for radiotherapy: a report by the CHART Steering Committee. *Thorax* 1996;51(1):262- 5.
91. Alsamarai S, Yao X, Cain HC, Chang BW, Chao HH, Connery DM, et al. The Effect of a Lung Cancer Care Coordination Program on Timeliness of Care. *Clinical Lung Cancer.* 2013;14(5):527-34.
92. Guldbrandt LM. The effect of direct referral for fast CT scan in early lung cancer detection in general practice. A clinical, cluster-randomised trial. *Dan Med J.* 2015;62(3).
93. Guldbrandt LM, Fenger-Gron M, Rasmussen TR, Jensen H, Vedsted P. The role of general practice in routes to diagnosis of lung cancer in Denmark: a population-based study of general practice involvement, diagnostic activity and diagnostic intervals. *BMC Health Serv Res.* 2015;15:21.
94. Verma AC, A., Lim, A.Y.H., Dessmon, Y.H., Goh, S.K., Kor, A.C., Ho, B., Basheer, D., Lee, Y.W., Abisheganaden, J. Timeliness of In-Hospital Journey of Suspected Lung Cancer Patients: From First Presentation-to-Start of Therapy. *Int J Cancer Research and Molecular Mechanisms* 2015;1(1).
95. Annakkaya AN, Arbak, P., Balbay, O., Bilgin, C., Erbas, M. and Bulut, I. Effect of symptom-to-treatment interval on prognosis in lung cancer. *Tumori.* 2007;93:61 -7.
96. Bardell T, Belliveau P, Kong W, Mackillop WJ. Waiting times for cancer surgery in Ontario: 1984-2000. *Clin Oncol (R Coll Radiol).* 2006;18(5):401-9.
97. Diaconescu R, Lafond, C., Whittom, R. Treatment Delays in Non-small Cell Lung Cancer and Their Prognostic Implications. *J Thorac Oncol.* 2011;6(7).
98. Dransfield MT, Lock BJ, Garver RI, Jr. Improving the lung cancer resection rate in the US Department of Veterans Affairs Health System. *Clin Lung Cancer.* 2006;7(4):268-72.

99. Faris N, Yu X, Sareen S, Signore RS, McHugh LM, Roark K, et al. Preoperative Evaluation of Lung Cancer in a Community Health Care Setting. *Ann Thorac Surg.* 2015;100(2):394-400.
100. Brocken P, Kiers BAB, Looijen-Salamon MG, Dekhuijzen PNR, Smits-Van der Graaf C, Peters-Bax L, et al. Timeliness of lung cancer diagnosis and treatment in a rapid outpatient diagnostic program with combined 18FDG-PET and contrast enhanced CT scanning. *Lung Cancer-J Iaslc.* 2012;75(3):336-41.
101. Non-Small Cell Lung Cancer guideline: Staging and Treatment. Dutch Association of Physicians for Pulmonary Disease and Tuberculosis, 2004.
102. Johnston GM, MacGarvie VL, Elliott D, Dewar RAD, MacIntyre MM, Nolan MC. Radiotherapy wait times for patients with a diagnosis of invasive cancer, 1992-2000. *Clin Invest Med.* 2004;27(3):142-56.
103. Manpower and Standards of Care Committee in Radiation Oncology Committee: Definition of Radiotherapy waiting times, (1999).
104. Jones RVH, Dudgeon, T.A. Time between presentation and treatment of six common cancer: a study in Devon. *British Journal of General Practice.* 1992;42:419 - 22.
105. Kesson E, Bucknall CE, McAlpine LG, Milroy R, Hole D, Vernon DR, et al. Lung cancer--management and outcome in Glasgow, 1991-92. *Br J Cancer.* 1998;78(10):1391-5.
106. Knorst MM, Dienstmann, R., Pankowski, F. Delay in the diagnosis and surgical treatment of lung cancer. *Jornal de Pneumologia.* 2003;29(6).
107. Laroche C, Wells F, Coulden R, Stewart S, Goddard M, Lowry E, et al. Improving surgical resection rate in lung cancer. *Thorax.* 1998;53(6):445-9.
108. Lee J, Marchbank A, Goldstraw P. Implementation of the British Thoracic Society recommendations for organising the care of patients with lung cancer: the surgeon's perspective. *Ann R Coll Surg Engl.* 2002;84(5):304-8.
109. Liberman M, Liberman D, Sampalis JS, Mulder DS. Delays to surgery in non-small-cell lung cancer. *Canadian Journal of Surgery.* 2006;49(1):31-6.
110. Loh LC, Chan LY, Tan RY, Govindaraju S, Ratnavelu K, Kumar S, et al. Time delay and its effect on survival in Malaysian patients with non-small cell lung carcinoma. *Malays J Med Sci.* 2006;13(1):37-42.
111. Lovgren M, Levealahti H, Tishelman C, Runesdotter S, Hamberg K. Time spans from first symptom to treatment in patients with lung cancer--the influence of symptoms and demographic characteristics. *Acta Oncol.* 2008;47(3):397-405.
112. Hillerdal G. Recommendations from the Swedish Lung Cancer Study Group: Shorter waiting times are demanded for quality in diagnostic work-ups for lung care. *Swedish Medical Journal.* 1999;96.
113. Porta M, Gallen, M., Malats, N.m Planas, J. Influence of "diagnostic delay" upon cancer survival: an analysis of five tumour sites. *Journal of Epidemiology and Community Health.* 1991;45(225 - 230).
114. Riedel RF, Wang X, McCormack M, Toloza E, Montana GS, Schreiber G, et al. Impact of a multidisciplinary thoracic oncology clinic on the timeliness of care. *J Thorac Oncol.* 2006;1(7):692-6.
115. Saint-Jacques N, Rayson D, Al-Fayea T, Virik K, Morzycki W, Younis T. Waiting times in early-stage non-small cell lung cancer (NSCLC). *J Thorac Oncol.* 2008;3(8):865-70.
116. Schultz EM, Powell AA, McMillan A, Olsson JK, Enderle MA, Graham BA, et al. Hospital characteristics associated with timeliness of care in veterans with lung cancer. *Am J Respir Crit Care Med.* 2009;179(7):595-600.
117. Finlay GA, Joseph B, Rodrigues CR, Griffith J, White AC. Advanced presentation of lung cancer in Asian immigrants: a case-control study. *Chest.* 2002;122(6):1938-43.

118. Shea AM, Curtis LH, Hammill BG, DiMartino LD, Abernethy AP, Schulman KA. Association between the medicare modernization act of 2003 and patient wait times and travel distance for chemotherapy. *JAMA - Journal of the American Medical Association*. 2008;300(2):189-96.
119. Shin DW, Cho J, Kim SY, Guallar E, Hwang SS, Cho B, et al. Delay to curative surgery greater than 12 weeks is associated with increased mortality in patients with colorectal and breast cancer but not lung or thyroid cancer. *Ann Surg Oncol*. 2013;20(8):2468-76.
120. Simunovic M, Gagliardi A, McCready D, Coates A, Levine M, DePetrillo D. A snapshot of waiting times for cancer surgery provided by surgeons affiliated with regional cancer centres in Ontario. *CMAJ*. 2001;165(4):421-5.
121. Singh H, Hirani K, Kadiyala H, Rudomiotov O, Davis T, Khan MM, et al. Characteristics and predictors of missed opportunities in lung cancer diagnosis: An electronic health record-based study. *Journal of Clinical Oncology*. 2010;28(20):3307-15.
122. Spurgeon P, Barwell F, Kerr D. Waiting times for cancer patients in England after general practitioners' referrals: retrospective national survey. *BMJ*. 2000;320(7238):838-9.
123. Thapa B, Sayami P. Low lung cancer resection rates in a tertiary level thoracic center in Nepal--where lies our problem? *Asian Pacific Journal of Cancer Prevention: Apjcp*. 2014;15(1):175-8.
124. Van de Vosse D, Chowdhury R, Boyce A, Halperin R. Wait Times Experienced by Lung Cancer Patients in the BC Southern Interior to Obtain Oncologic Care: Exploration of the Intervals from First Abnormal Imaging to Oncologic Treatment. *Cureus*. 2015;7(9):e330.
125. Rose PW, Rubin G, Perera-Salazar R, Almberg SS, Barisic A, Dawes M, et al. Explaining variation in cancer survival between 11 jurisdictions in the International Cancer Benchmarking Partnership: a primary care vignette survey. *BMJ open*. 2015;5(5):e007212.
126. Wai ES, Mackinnon M, Hooker R, Moccia P, Perry KR, Truong PT. Wait times in diagnostic evaluation and treatment for patients with stage III non-small cell lung cancer in British Columbia. *American Journal of Clinical Oncology*. 2012;35(4):373-7.
127. Yurdakul AS, Kocaturk C, Bayiz H, Gursoy S, Bircan A, Ozcan A, et al. Patient and physician delay in the diagnosis and treatment of non-small cell lung cancer in Turkey. *Cancer Epidemiol*. 2015;39(2):216-21.
128. Chandra S, Mohan A, Guleria R, Singh V, Yadav P. Delays during the diagnostic evaluation and treatment of lung cancer. *Asian Pac J Cancer Prev*. 2009;10(3):453-6.
129. Yilmaz A, Damadoglu E, Salturk C, Okur E, Tuncer LY, Halezeroglu S. Delays in the diagnosis and treatment of primary lung cancer: are longer delays associated with advanced pathological stage? *Ups J Med Sci*. 2008;113(3):287-96.
130. Perez G, Porta M, Borrell C, Casamitjana M, Bonfill X, Bolibar I, et al. Interval from diagnosis to treatment onset for six major cancers in Catalonia, Spain. *Cancer Detect Prev*. 2008;32(3):267-75.
131. Burmeister BH, Zarate DD, Burmeister EA, Harden HE, Colquist SP, Cossio DL, et al. Lung cancer patients in Queensland suffer delays in receiving radiation therapy--but not as a result of distance. *Intern Med J*. 2010;40(2):126-32.
132. Berthelet E, Truong, P.T., Lesperance, M., Lim, J.T.W., Wai, E.S., MacNeil, M.V., Liu, M., Joe, H., Olivotto, I.A. Examining Time Intervals Between Diagnosis and Treatment in the Management of Patients With Limited Stage Small Cell Lung Cancer. *American Journal of Clinical Oncology*. 2006;29:21 - 6.
133. Giroux Leprieur E, Labrune S, Giraud V, Gendry T, Cobarzan D, Chinet T. Delay between the initial symptoms, the diagnosis and the onset of specific treatment in elderly patients with lung cancer. *Clin Lung Cancer*. 2012;13(5):363-8.
134. Bilimoria KY, Ko CY, Tomlinson JS, Stewart AK, Talamonti MS, Hynes DL, et al. Wait times for cancer surgery in the United States: Trends and predictors of delays. *Annals of Surgery*. 2011;253(4):779-85.
135. Booth CM, Shepherd FA, Peng Y, Darling G, Li G, Kong W, et al. Time to adjuvant chemotherapy and survival in non-small cell lung cancer: A population-based study. *Cancer*. 2013;119(6):1243-50.

136. Cheung WY, Butler JR, Kliwer EV, Demers AA, Musto G, Welch S, et al. Analysis of Wait Times and Costs During the Peri-Diagnostic Period for Non-Small Cell Lung Cancer. *Lung Cancer*. 2011;72(1):125-31.
137. Collins I, Naidoo J, Rowley S, Reynolds JV, Kennedy MJ. Waiting times for access, diagnosis and treatment in a cancer centre. *Ir Med J*. 2009;102(9).
138. Grunfeld E, Watters JM, Urquhart R, O'Rourke K, Jaffey J, Maziak DE, et al. A prospective study of peri-diagnostic and surgical wait times for patients with presumptive colorectal, lung, or prostate cancer. *British Journal of Cancer*. 2009;100(1):56-62.
139. Sood JD, Wong C, Bevan R, Veale A, Sivakumaran P. Delays in the assessment and management of primary lung cancers in South Auckland. *New Zealand Medical Journal*. 2009;122(1294):42-50.
140. Stevens W, Stevens G, Kolbe J, Cox B. Varied routes of entry into secondary care and delays in the management of lung cancer in New Zealand. *Asia-Pac J Clin Oncol*. 2008;4(2):98-106.
141. Li X, Scarfe A, King K, Fenton D, Butts C, Winget M. Timeliness of cancer care from diagnosis to treatment: A comparison between patients with breast, colon, rectal or lung cancer. *Int J Qual Health Care*. 2013;25(2):197-204.
142. Allgar VL, Neal RD. Delays in the diagnosis of six cancers: Analysis of data from the National Survey of NHS Patients: Cancer. *British Journal of Cancer*. 2005;92(11):1959-70.
143. Rubin GP, Saunders CL, Abel GA, McPhail S, Lyratzopoulos G, Neal RD. Impact of investigations in general practice on timeliness of referral for patients subsequently diagnosed with cancer: Analysis of national primary care audit data. *British Journal of Cancer*. 2015;112(4):676-87.
144. Gotfrit J, Zhang T, Zanon-Heacock S, Wheatley-Price P. Patients With Advanced Non-Small Cell Lung Cancer Requiring Inpatient Medical Oncology Consultation: Characteristics, Referral Patterns, and Outcomes. *Clin Lung Cancer*. 2016;17(4):292-300.
145. Ichinohe K, Takahashi M, Tooyama N. Delay by patients and doctors in treatment of Pancoast tumor. *Wiener Klinische Wochenschrift*. 2006;118(13-14):405-10.
146. Mackillop WJ, Fu H, Quirt CF, Dixon P, Brundage M, Zhou Y. Waiting for radiotherapy in Ontario. *International Journal of Radiation Oncology, Biology, Physics*. 1994;30(1):221-8.
147. Mackillop WJ, Zhou Y, Quirt CF. A comparison of delays in the treatment of cancer with radiation in Canada and the United States. *International Journal of Radiation Oncology, Biology, Physics*. 1995;32(2):531-9.
148. Kim JO, Davis F, Butts C, Winget M. Waiting Time Intervals for Non-small Cell Lung Cancer Diagnosis and Treatment in Alberta: Quantification of Intervals and Identification of Risk Factors Associated with Delays. *Clinical Oncology (Royal College of Radiologists)*. 2016;28(12):750-9.
149. Hunnibell LS, Rose MG, Connery DM, Grens CE, Hampel JM, Rosa M, et al. Using nurse navigation to improve timeliness of lung cancer care at a veterans hospital. *Clin J Oncol Nurs*. 2012;16(1):29-36.
150. Lal AP, S.; Russell, C.; Woolhouse, I. The novel use of fast track CT to select patients for lung cancer clinics: effect on clinic efficiency, waiting times, and patient satisfaction. *Postgraduate Medical Journal*. 2011;87:264 - 8.
151. Aasebo US, HH; Postmyr, M. The Lean method as a clinical pathway facilitator in patients with lung cancer. *The Clinical Respiratory Journal*. 2011;6(3):169 - 74.
152. Transforming Health Care Scheduling and Access: Getting to Now. Washington D. C. : Institute of Medicine (IOM), 2015.
153. Optimal care pathway for people with lung cancer. Australia: Cancer Council Australia and Cancer Australia (Australian Government), 2016.
154. National Cancer Care pathways. Denmark: Danish National Board of Health, 2009.

155. National Optimal Lung Cancer Pathway and Implementation Guide. United Kingdom: Lung Cancer Clinical Expert Group, 2017 August 2017. Report No.
156. Forrest LF, Adams J, White M, Rubin G. Factors associated with timeliness of post-primary care referral, diagnosis and treatment for lung cancer: population-based, data-linkage study. *Br J Cancer*. 2014;111(9):1843-51.
157. Stevens W, Stevens G, Kolbe J, Cox B. Ethnic differences in the management of lung cancer in New Zealand. *Journal of Thoracic Oncology*. 2008;3(3):237-44.
158. Rolke HB, Bakke PS, Gallefoss F. Delays in the diagnostic pathways for primary pulmonary carcinoma in Southern Norway. *Respiratory Medicine*. 2007;101(6):1251-7.
159. Fradet Y AA, Dranitsaris G, Siemens R, Tsihlias J, Fleshner N. Fradet Y, Aprikian A, Dranitsaris G, Siemens R, Tsihlias J, Fleshner N. *Canadian Journal of Urology*. 2006;13(Supplement 3):37 - 47.
160. Perez G, Porta M, Borrell C, Casamitjana M, Bonfill X, Bolibar I, et al. Interval from diagnosis to treatment onset for six major cancers in Catalonia, Spain. *Cancer Detection & Prevention*. 2008;32(3):267-75.
161. Non-small cell lung cancer guideline: staging and treatment, (2004).
